# Supplementary material for: Proteomic Alterations in Follicular Fluid of Human Small Antral Follicles Collected from Polycystic Ovaries—A Pilot Study
Source: Life (Basel). 2022 Mar 8;12(3):391. doi: 10.3390/life12030391 (PMC8954146; doi:10.3390/life12030391)
Supplement: Supplementary file 1 [file life-12-00391-s001.zip › Supplementary tables S1-S5.xlsx]

## Sheet: Table S1
Table S1. List of identified proteins				Valid values
No.	Accession	Gene symbol	Description	non-PCOS	PCOS
1	P02768	ALB	Serum albumin OS=Homo sapiens OX=9606 GN=ALB PE=1 SV=2	10	10
2	P01024	C3	Complement C3 OS=Homo sapiens OX=9606 GN=C3 PE=1 SV=2	10	10
3	P01009	SERPINA1	Alpha-1-antitrypsin OS=Homo sapiens OX=9606 GN=SERPINA1 PE=1 SV=3	10	10
4	P02787	TF	Serotransferrin OS=Homo sapiens OX=9606 GN=TF PE=1 SV=3	10	10
5	P0C0L5	C4B	Complement C4-B OS=Homo sapiens OX=9606 GN=C4B PE=1 SV=2	10	10
6	P0C0L4	C4A	Complement C4-A OS=Homo sapiens OX=9606 GN=C4A PE=1 SV=2	10	10
7	P02647	APOA1	Apolipoprotein A-I OS=Homo sapiens OX=9606 GN=APOA1 PE=1 SV=1	10	10
8	P98160	HSPG2	Basement membrane-specific heparan sulfate proteoglycan core protein OS=Homo sapiens OX=9606 GN=HSPG2 PE=1 SV=4	10	10
9	P0DOX5	N/A	Immunoglobulin gamma-1 heavy chain OS=Homo sapiens OX=9606 PE=1 SV=2	10	10
10	P00450	CP	Ceruloplasmin OS=Homo sapiens OX=9606 GN=CP PE=1 SV=1	10	10
11	P02790	HPX	Hemopexin OS=Homo sapiens OX=9606 GN=HPX PE=1 SV=2	10	10
12	P01008	SERPINC1	Antithrombin-III OS=Homo sapiens OX=9606 GN=SERPINC1 PE=1 SV=1	10	10
13	P02774	GC	Vitamin D-binding protein OS=Homo sapiens OX=9606 GN=GC PE=1 SV=2	10	10
14	P01011	SERPINA3	Alpha-1-antichymotrypsin OS=Homo sapiens OX=9606 GN=SERPINA3 PE=1 SV=2	10	10
15	Q14624	ITIH4	Inter-alpha-trypsin inhibitor heavy chain H4 OS=Homo sapiens OX=9606 GN=ITIH4 PE=1 SV=4	10	10
16	Q14624-2	ITIH4-2	Isoform 2 of Inter-alpha-trypsin inhibitor heavy chain H4 OS=Homo sapiens OX=9606 GN=ITIH4	10	10
17	P08603	CFH	Complement factor H OS=Homo sapiens OX=9606 GN=CFH PE=1 SV=4	10	10
18	P00738	HP	Haptoglobin OS=Homo sapiens OX=9606 GN=HP PE=1 SV=1	10	10
19	P00747	PLG	Plasminogen OS=Homo sapiens OX=9606 GN=PLG PE=1 SV=2	10	10
20	P01023	A2M	Alpha-2-macroglobulin OS=Homo sapiens OX=9606 GN=A2M PE=1 SV=3	10	10
21	P01834	IGKC	Immunoglobulin kappa constant OS=Homo sapiens OX=9606 GN=IGKC PE=1 SV=2	10	10
22	P01859	IGHG2	Immunoglobulin heavy constant gamma 2 OS=Homo sapiens OX=9606 GN=IGHG2 PE=1 SV=2	10	10
23	P01031	C5	Complement C5 OS=Homo sapiens OX=9606 GN=C5 PE=1 SV=4	10	10
24	P06727	APOA4	Apolipoprotein A-IV OS=Homo sapiens OX=9606 GN=APOA4 PE=1 SV=3	10	10
25	P02751-1	FN1-1	Isoform 1 of Fibronectin OS=Homo sapiens OX=9606 GN=FN1	10	10
26	P19823	ITIH2	Inter-alpha-trypsin inhibitor heavy chain H2 OS=Homo sapiens OX=9606 GN=ITIH2 PE=1 SV=2	10	10
27	P02751	FN1	Fibronectin OS=Homo sapiens OX=9606 GN=FN1 PE=1 SV=5	10	10
28	P0DOX7	N/A	Immunoglobulin kappa light chain OS=Homo sapiens OX=9606 PE=1 SV=1	10	10
29	P01860	IGHG3	Immunoglobulin heavy constant gamma 3 OS=Homo sapiens OX=9606 GN=IGHG3 PE=1 SV=2	10	10
30	P00751	CFB	Complement factor B OS=Homo sapiens OX=9606 GN=CFB PE=1 SV=2	10	10
31	P02671	FGA	Fibrinogen alpha chain OS=Homo sapiens OX=9606 GN=FGA PE=1 SV=2	10	10
32	P19827	ITIH1	Inter-alpha-trypsin inhibitor heavy chain H1 OS=Homo sapiens OX=9606 GN=ITIH1 PE=1 SV=3	10	10
33	P01042	KNG1	Kininogen-1 OS=Homo sapiens OX=9606 GN=KNG1 PE=1 SV=2	10	10
34	P01042-2	KNG1-2	Isoform LMW of Kininogen-1 OS=Homo sapiens OX=9606 GN=KNG1	10	10
35	P02675	FGB	Fibrinogen beta chain OS=Homo sapiens OX=9606 GN=FGB PE=1 SV=2	10	10
36	P01876	IGHA1	Immunoglobulin heavy constant alpha 1 OS=Homo sapiens OX=9606 GN=IGHA1 PE=1 SV=2	10	10
37	P01861	IGHG4	Immunoglobulin heavy constant gamma 4 OS=Homo sapiens OX=9606 GN=IGHG4 PE=1 SV=1	10	10
38	Q969T7	NT5C3B	7-methylguanosine phosphate-specific 5'-nucleotidase OS=Homo sapiens OX=9606 GN=NT5C3B PE=1 SV=4	10	10
39	P05155	SERPING1	Plasma protease C1 inhibitor OS=Homo sapiens OX=9606 GN=SERPING1 PE=1 SV=2	10	10
40	P02765	AHSG	Alpha-2-HS-glycoprotein OS=Homo sapiens OX=9606 GN=AHSG PE=1 SV=2	10	10
41	P06396	GSN	Gelsolin OS=Homo sapiens OX=9606 GN=GSN PE=1 SV=1	10	10
42	P06396-2	GSN-2	Isoform 2 of Gelsolin OS=Homo sapiens OX=9606 GN=GSN	10	10
43	P00734	F2	Prothrombin OS=Homo sapiens OX=9606 GN=F2 PE=1 SV=2	10	10
44	P43652	AFM	Afamin OS=Homo sapiens OX=9606 GN=AFM PE=1 SV=1	10	10
45	P04217	A1BG	Alpha-1B-glycoprotein OS=Homo sapiens OX=9606 GN=A1BG PE=1 SV=4	10	10
46	P00739	HPR	Haptoglobin-related protein OS=Homo sapiens OX=9606 GN=HPR PE=2 SV=2	10	10
47	P05546	SERPIND1	Heparin cofactor 2 OS=Homo sapiens OX=9606 GN=SERPIND1 PE=1 SV=3	10	10
48	P02679	FGG	Fibrinogen gamma chain OS=Homo sapiens OX=9606 GN=FGG PE=1 SV=3	10	10
49	P0DOX8	N/A	Immunoglobulin lambda-1 light chain OS=Homo sapiens OX=9606 PE=1 SV=1	10	10
50	P19827-2	ITIH1-2	Isoform 2 of Inter-alpha-trypsin inhibitor heavy chain H1 OS=Homo sapiens OX=9606 GN=ITIH1	10	10
51	P02749	APOH	Beta-2-glycoprotein 1 OS=Homo sapiens OX=9606 GN=APOH PE=1 SV=3	10	10
52	P10909-6	CLU	Isoform 6 of Clusterin OS=Homo sapiens OX=9606 GN=CLU	10	10
53	P0DOY2	IGLC2	Immunoglobulin lambda constant 2 OS=Homo sapiens OX=9606 GN=IGLC2 PE=1 SV=1	10	10
54	P02748	C9	Complement component C9 OS=Homo sapiens OX=9606 GN=C9 PE=1 SV=2	10	10
55	P04196	HRG	Histidine-rich glycoprotein OS=Homo sapiens OX=9606 GN=HRG PE=1 SV=1	10	10
56	P0DOX2	N/A	Immunoglobulin alpha-2 heavy chain OS=Homo sapiens OX=9606 PE=1 SV=2	10	10
57	P10643	C7	Complement component C7 OS=Homo sapiens OX=9606 GN=C7 PE=1 SV=2	10	10
58	P13671	C6	Complement component C6 OS=Homo sapiens OX=9606 GN=C6 PE=1 SV=3	10	10
59	P02652	APOA2	Apolipoprotein A-II OS=Homo sapiens OX=9606 GN=APOA2 PE=1 SV=1	10	10
60	P08697	SERPINF2	Alpha-2-antiplasmin OS=Homo sapiens OX=9606 GN=SERPINF2 PE=1 SV=3	10	10
61	P04004	VTN	Vitronectin OS=Homo sapiens OX=9606 GN=VTN PE=1 SV=1	10	10
62	P04217-2	A1BG-2	Isoform 2 of Alpha-1B-glycoprotein OS=Homo sapiens OX=9606 GN=A1BG	10	10
63	P04114	APOB	Apolipoprotein B-100 OS=Homo sapiens OX=9606 GN=APOB PE=1 SV=2	10	10
64	P25311	AZGP1	Zinc-alpha-2-glycoprotein OS=Homo sapiens OX=9606 GN=AZGP1 PE=1 SV=2	10	10
65	P29622	SERPINA4	Kallistatin OS=Homo sapiens OX=9606 GN=SERPINA4 PE=1 SV=3	10	10
66	P07358	C8B	Complement component C8 beta chain OS=Homo sapiens OX=9606 GN=C8B PE=1 SV=3	10	10
67	P02766	TTR	Transthyretin OS=Homo sapiens OX=9606 GN=TTR PE=1 SV=1	10	10
68	P01019	AGT	Angiotensinogen OS=Homo sapiens OX=9606 GN=AGT PE=1 SV=1	10	10
69	P06681	C2	Complement C2 OS=Homo sapiens OX=9606 GN=C2 PE=1 SV=2	10	10
70	P35858	IGFALS	Insulin-like growth factor-binding protein complex acid labile subunit OS=Homo sapiens OX=9606 GN=IGFALS PE=1 SV=1	10	10
71	P03952	KLKB1	Plasma kallikrein OS=Homo sapiens OX=9606 GN=KLKB1 PE=1 SV=1	10	10
72	Q06033	ITIH3	Inter-alpha-trypsin inhibitor heavy chain H3 OS=Homo sapiens OX=9606 GN=ITIH3 PE=1 SV=2	10	10
73	P05156	CFI	Complement factor I OS=Homo sapiens OX=9606 GN=CFI PE=1 SV=2	10	10
74	P02753	RBP4	Retinol-binding protein 4 OS=Homo sapiens OX=9606 GN=RBP4 PE=1 SV=3	10	10
75	P13611	VCAN	Versican core protein OS=Homo sapiens OX=9606 GN=VCAN PE=1 SV=3	10	10
76	P13611-2	VCAN-2	Isoform V1 of Versican core protein OS=Homo sapiens OX=9606 GN=VCAN	10	10
77	P20742	PZP	Pregnancy zone protein OS=Homo sapiens OX=9606 GN=PZP PE=1 SV=4	10	10
78	P00748	F12	Coagulation factor XII OS=Homo sapiens OX=9606 GN=F12 PE=1 SV=3	10	10
79	P36955	SERPINF1	Pigment epithelium-derived factor OS=Homo sapiens OX=9606 GN=SERPINF1 PE=1 SV=4	10	10
80	A0M8Q6	IGLC7	Immunoglobulin lambda constant 7 OS=Homo sapiens OX=9606 GN=IGLC7 PE=1 SV=3	10	10
81	P05543	SERPINA7	Thyroxine-binding globulin OS=Homo sapiens OX=9606 GN=SERPINA7 PE=1 SV=2	10	10
82	Q96PD5	PGLYRP2	N-acetylmuramoyl-L-alanine amidase OS=Homo sapiens OX=9606 GN=PGLYRP2 PE=1 SV=1	10	10
83	P02763	ORM1	Alpha-1-acid glycoprotein 1 OS=Homo sapiens OX=9606 GN=ORM1 PE=1 SV=1	10	10
84	P07357	C8A	Complement component C8 alpha chain OS=Homo sapiens OX=9606 GN=C8A PE=1 SV=2	10	10
85	P02760	AMBP	Protein AMBP OS=Homo sapiens OX=9606 GN=AMBP PE=1 SV=1	10	10
86	P60709	ACTB	Actin, cytoplasmic 1 OS=Homo sapiens OX=9606 GN=ACTB PE=1 SV=1	10	10
87	P02649	APOE	Apolipoprotein E OS=Homo sapiens OX=9606 GN=APOE PE=1 SV=1	10	10
88	P02750	LRG1	Leucine-rich alpha-2-glycoprotein OS=Homo sapiens OX=9606 GN=LRG1 PE=1 SV=2	10	10
89	P08185	SERPINA6	Corticosteroid-binding globulin OS=Homo sapiens OX=9606 GN=SERPINA6 PE=1 SV=1	10	10
90	Q03591	CFHR1	Complement factor H-related protein 1 OS=Homo sapiens OX=9606 GN=CFHR1 PE=1 SV=2	10	10
91	Q9H3U1	UNC45A	Protein unc-45 homolog A OS=Homo sapiens OX=9606 GN=UNC45A PE=1 SV=1	10	10
92	Q16610	ECM1	Extracellular matrix protein 1 OS=Homo sapiens OX=9606 GN=ECM1 PE=1 SV=2	10	10
93	Q14520	HABP2	Hyaluronan-binding protein 2 OS=Homo sapiens OX=9606 GN=HABP2 PE=1 SV=1	10	10
94	O75882	ATRN	Attractin OS=Homo sapiens OX=9606 GN=ATRN PE=1 SV=2	10	10
95	P27169	PON1	Serum paraoxonase/arylesterase 1 OS=Homo sapiens OX=9606 GN=PON1 PE=1 SV=3	10	10
96	P19652	ORM2	Alpha-1-acid glycoprotein 2 OS=Homo sapiens OX=9606 GN=ORM2 PE=1 SV=2	10	10
97	P22792	CPN2	Carboxypeptidase N subunit 2 OS=Homo sapiens OX=9606 GN=CPN2 PE=1 SV=3	10	10
98	P02654	APOC1	Apolipoprotein C-I OS=Homo sapiens OX=9606 GN=APOC1 PE=1 SV=1	10	10
99	Q96IY4	CPB2	Carboxypeptidase B2 OS=Homo sapiens OX=9606 GN=CPB2 PE=1 SV=2	10	10
100	P01619	IGKV3-20	Immunoglobulin kappa variable 3-20 OS=Homo sapiens OX=9606 GN=IGKV3-20 PE=1 SV=2	10	10
101	P62736	ACTA2	Actin, aortic smooth muscle OS=Homo sapiens OX=9606 GN=ACTA2 PE=1 SV=1	10	10
102	P04003	C4BPA	C4b-binding protein alpha chain OS=Homo sapiens OX=9606 GN=C4BPA PE=1 SV=2	10	10
103	P04278	SHBG	Sex hormone-binding globulin OS=Homo sapiens OX=9606 GN=SHBG PE=1 SV=2	10	10
104	P51884	LUM	Lumican OS=Homo sapiens OX=9606 GN=LUM PE=1 SV=2	10	10
105	P05090	APOD	Apolipoprotein D OS=Homo sapiens OX=9606 GN=APOD PE=1 SV=1	10	10
106	P07360	C8G	Complement component C8 gamma chain OS=Homo sapiens OX=9606 GN=C8G PE=1 SV=3	10	10
107	Q08380	LGALS3BP	Galectin-3-binding protein OS=Homo sapiens OX=9606 GN=LGALS3BP PE=1 SV=1	10	10
108	P07093-3	SERPINE2-3	Isoform 3 of Glia-derived nexin OS=Homo sapiens OX=9606 GN=SERPINE2	10	10
109	P07093	SERPINE2	Glia-derived nexin OS=Homo sapiens OX=9606 GN=SERPINE2 PE=1 SV=1	10	10
110	P07225	PROS1	Vitamin K-dependent protein S OS=Homo sapiens OX=9606 GN=PROS1 PE=1 SV=1	10	10
111	A0A0C4DH25	IGKV3D-20	Immunoglobulin kappa variable 3D-20 OS=Homo sapiens OX=9606 GN=IGKV3D-20 PE=3 SV=1	10	10
112	P00740	F9	Coagulation factor IX OS=Homo sapiens OX=9606 GN=F9 PE=1 SV=2	10	10
113	P0DOX6	N/A	Immunoglobulin mu heavy chain OS=Homo sapiens OX=9606 PE=1 SV=2	10	10
114	P01871	IGHM	Immunoglobulin heavy constant mu OS=Homo sapiens OX=9606 GN=IGHM PE=1 SV=4	10	10
115	P26927	MST1	Hepatocyte growth factor-like protein OS=Homo sapiens OX=9606 GN=MST1 PE=1 SV=2	10	10
116	P80108	GPLD1	Phosphatidylinositol-glycan-specific phospholipase D OS=Homo sapiens OX=9606 GN=GPLD1 PE=1 SV=3	10	10
117	P09871	C1S	Complement C1s subcomponent OS=Homo sapiens OX=9606 GN=C1S PE=1 SV=1	10	10
118	O14791	APOL1	Apolipoprotein L1 OS=Homo sapiens OX=9606 GN=APOL1 PE=1 SV=5	10	10
119	P23142-4	FBLN1-4	Isoform C of Fibulin-1 OS=Homo sapiens OX=9606 GN=FBLN1	10	10
120	P05452	CLEC3B	Tetranectin OS=Homo sapiens OX=9606 GN=CLEC3B PE=1 SV=3	10	10
121	Q96KN2	CNDP1	Beta-Ala-His dipeptidase OS=Homo sapiens OX=9606 GN=CNDP1 PE=1 SV=4	10	10
122	P12111	COL6A3	Collagen alpha-3(VI) chain OS=Homo sapiens OX=9606 GN=COL6A3 PE=1 SV=5	10	10
123	P12111-4	COL6A3-4	Isoform 4 of Collagen alpha-3(VI) chain OS=Homo sapiens OX=9606 GN=COL6A3	10	10
124	O00391	QSOX1	Sulfhydryl oxidase 1 OS=Homo sapiens OX=9606 GN=QSOX1 PE=1 SV=3	10	10
125	P00736	C1R	Complement C1r subcomponent OS=Homo sapiens OX=9606 GN=C1R PE=1 SV=2	10	10
126	P05154	SERPINA5	Plasma serine protease inhibitor OS=Homo sapiens OX=9606 GN=SERPINA5 PE=1 SV=3	10	10
127	P23142	FBLN1	Fibulin-1 OS=Homo sapiens OX=9606 GN=FBLN1 PE=1 SV=4	10	10
128	P16112	ACAN	Aggrecan core protein OS=Homo sapiens OX=9606 GN=ACAN PE=1 SV=3	10	10
129	P00742	F10	Coagulation factor X OS=Homo sapiens OX=9606 GN=F10 PE=1 SV=2	10	10
130	Q15582	TGFBI	Transforming growth factor-beta-induced protein ig-h3 OS=Homo sapiens OX=9606 GN=TGFBI PE=1 SV=1	10	10
131	P15169	CPN1	Carboxypeptidase N catalytic chain OS=Homo sapiens OX=9606 GN=CPN1 PE=1 SV=1	10	10
132	P0DOX3	N/A	Immunoglobulin delta heavy chain OS=Homo sapiens OX=9606 PE=1 SV=1	10	10
133	P03951	F11	Coagulation factor XI OS=Homo sapiens OX=9606 GN=F11 PE=1 SV=1	10	10
134	P00746	CFD	Complement factor D OS=Homo sapiens OX=9606 GN=CFD PE=1 SV=5	10	10
135	P68871	HBB	Hemoglobin subunit beta OS=Homo sapiens OX=9606 GN=HBB PE=1 SV=2	10	10
136	P04432	IGKV1D-39	Immunoglobulin kappa variable 1D-39 OS=Homo sapiens OX=9606 GN=IGKV1D-39 PE=3 SV=2	10	10
137	P36980	CFHR2	Complement factor H-related protein 2 OS=Homo sapiens OX=9606 GN=CFHR2 PE=1 SV=1	10	10
138	Q04756	HGFAC	Hepatocyte growth factor activator OS=Homo sapiens OX=9606 GN=HGFAC PE=1 SV=1	10	10
139	P05160	F13B	Coagulation factor XIII B chain OS=Homo sapiens OX=9606 GN=F13B PE=1 SV=3	10	10
140	A0A0C4DH73	IGKV1-12	Immunoglobulin kappa variable 1-12 OS=Homo sapiens OX=9606 GN=IGKV1-12 PE=3 SV=1	10	10
141	P01880	IGHD	Immunoglobulin heavy constant delta OS=Homo sapiens OX=9606 GN=IGHD PE=1 SV=3	10	10
142	P02656	APOC3	Apolipoprotein C-III OS=Homo sapiens OX=9606 GN=APOC3 PE=1 SV=1	10	10
143	P01780	IGHV3-7	Immunoglobulin heavy variable 3-7 OS=Homo sapiens OX=9606 GN=IGHV3-7 PE=1 SV=2	10	10
144	P22105-1	TNXB	Isoform 3 of Tenascin-X OS=Homo sapiens OX=9606 GN=TNXB	10	10
145	P06331	IGHV4-34	Immunoglobulin heavy variable 4-34 OS=Homo sapiens OX=9606 GN=IGHV4-34 PE=1 SV=2	10	10
146	P08571	CD14	Monocyte differentiation antigen CD14 OS=Homo sapiens OX=9606 GN=CD14 PE=1 SV=2	10	10
147	P12109	COL6A1	Collagen alpha-1(VI) chain OS=Homo sapiens OX=9606 GN=COL6A1 PE=1 SV=3	10	10
148	P04070	PROC	Vitamin K-dependent protein C OS=Homo sapiens OX=9606 GN=PROC PE=1 SV=1	10	10
149	P0DP08	IGHV4-38-2	Immunoglobulin heavy variable 4-38-2 OS=Homo sapiens OX=9606 GN=IGHV4-38-2 PE=3 SV=1	10	10
150	P01825	IGHV4-59	Immunoglobulin heavy variable 4-59 OS=Homo sapiens OX=9606 GN=IGHV4-59 PE=1 SV=2	10	10
151	A0A075B6K4	IGLV3-10	Immunoglobulin lambda variable 3-10 OS=Homo sapiens OX=9606 GN=IGLV3-10 PE=3 SV=2	10	10
152	P01717	IGLV3-25	Immunoglobulin lambda variable 3-25 OS=Homo sapiens OX=9606 GN=IGLV3-25 PE=1 SV=2	10	10
153	Q9UK55	SERPINA10	Protein Z-dependent protease inhibitor OS=Homo sapiens OX=9606 GN=SERPINA10 PE=1 SV=1	10	10
154	P06312	IGKV4-1	Immunoglobulin kappa variable 4-1 OS=Homo sapiens OX=9606 GN=IGKV4-1 PE=1 SV=1	10	10
155	P04264	KRT1	Keratin, type II cytoskeletal 1 OS=Homo sapiens OX=9606 GN=KRT1 PE=1 SV=6	10	10
156	Q2TV78	MST1L	Putative macrophage stimulating 1-like protein OS=Homo sapiens OX=9606 GN=MST1L PE=2 SV=2	10	10
157	A0A075B6R2	IGHV4-4	Immunoglobulin heavy variable 4-4 OS=Homo sapiens OX=9606 GN=IGHV4-4 PE=3 SV=2	10	10
158	P68363	TUBA1B	Tubulin alpha-1B chain OS=Homo sapiens OX=9606 GN=TUBA1B PE=1 SV=1	10	10
159	P06276	BCHE	Cholinesterase OS=Homo sapiens OX=9606 GN=BCHE PE=1 SV=1	10	10
160	P35542	SAA4	Serum amyloid A-4 protein OS=Homo sapiens OX=9606 GN=SAA4 PE=1 SV=2	10	10
161	P35908	KRT2	Keratin, type II cytoskeletal 2 epidermal OS=Homo sapiens OX=9606 GN=KRT2 PE=1 SV=2	10	10
162	Q02985	CFHR3	Complement factor H-related protein 3 OS=Homo sapiens OX=9606 GN=CFHR3 PE=1 SV=2	10	10
163	P80748	IGLV3-21	Immunoglobulin lambda variable 3-21 OS=Homo sapiens OX=9606 GN=IGLV3-21 PE=1 SV=2	10	10
164	P55058	PLTP	Phospholipid transfer protein OS=Homo sapiens OX=9606 GN=PLTP PE=1 SV=1	10	10
165	P33151	CDH5	Cadherin-5 OS=Homo sapiens OX=9606 GN=CDH5 PE=1 SV=5	10	10
166	P17936	IGFBP3	Insulin-like growth factor-binding protein 3 OS=Homo sapiens OX=9606 GN=IGFBP3 PE=1 SV=2	10	10
167	A0A075B6K5	IGLV3-9	Immunoglobulin lambda variable 3-9 OS=Homo sapiens OX=9606 GN=IGLV3-9 PE=3 SV=1	10	10
168	P07996	THBS1	Thrombospondin-1 OS=Homo sapiens OX=9606 GN=THBS1 PE=1 SV=2	10	10
169	Q71U36	TUBA1A	Tubulin alpha-1A chain OS=Homo sapiens OX=9606 GN=TUBA1A PE=1 SV=1	10	10
170	O95445	APOM	Apolipoprotein M OS=Homo sapiens OX=9606 GN=APOM PE=1 SV=2	10	10
171	P13796	LCP1	Plastin-2 OS=Homo sapiens OX=9606 GN=LCP1 PE=1 SV=6	10	10
172	A0A087WSY6	IGKV3D-15	Immunoglobulin kappa variable 3D-15 OS=Homo sapiens OX=9606 GN=IGKV3D-15 PE=3 SV=6	10	10
173	Q9BXR6	CFHR5	Complement factor H-related protein 5 OS=Homo sapiens OX=9606 GN=CFHR5 PE=1 SV=1	10	10
174	P43251	BTD	Biotinidase OS=Homo sapiens OX=9606 GN=BTD PE=1 SV=2	10	10
175	P21333	FLNA	Filamin-A OS=Homo sapiens OX=9606 GN=FLNA PE=1 SV=4	10	10
176	P01768	IGHV3-30	Immunoglobulin heavy variable 3-30 OS=Homo sapiens OX=9606 GN=IGHV3-30 PE=1 SV=2	10	10
177	P27918	CFP	Properdin OS=Homo sapiens OX=9606 GN=CFP PE=1 SV=2	10	10
178	Q9HCB6	SPON1	Spondin-1 OS=Homo sapiens OX=9606 GN=SPON1 PE=1 SV=2	10	10
179	A2NJV5	IGKV2-29	Immunoglobulin kappa variable 2-29 OS=Homo sapiens OX=9606 GN=IGKV2-29 PE=3 SV=2	10	10
180	Q9NZP8	C1RL	Complement C1r subcomponent-like protein OS=Homo sapiens OX=9606 GN=C1RL PE=1 SV=2	10	10
181	P62805	HIST1H4A	Histone H4 OS=Homo sapiens OX=9606 GN=H4C1 PE=1 SV=2	10	10
182	P22352	GPX3	Glutathione peroxidase 3 OS=Homo sapiens OX=9606 GN=GPX3 PE=1 SV=2	10	10
183	P18065	IGFBP2	Insulin-like growth factor-binding protein 2 OS=Homo sapiens OX=9606 GN=IGFBP2 PE=1 SV=2	10	10
184	P08670	VIM	Vimentin OS=Homo sapiens OX=9606 GN=VIM PE=1 SV=4	10	10
185	P07900	HSP90AA1	Heat shock protein HSP 90-alpha OS=Homo sapiens OX=9606 GN=HSP90AA1 PE=1 SV=5	10	10
186	P18428	LBP	Lipopolysaccharide-binding protein OS=Homo sapiens OX=9606 GN=LBP PE=1 SV=3	10	10
187	P14151	SELL	L-selectin OS=Homo sapiens OX=9606 GN=SELL PE=1 SV=2	10	10
188	P02042	HBD	Hemoglobin subunit delta OS=Homo sapiens OX=9606 GN=HBD PE=1 SV=2	10	10
189	P06733	ENO1	Alpha-enolase OS=Homo sapiens OX=9606 GN=ENO1 PE=1 SV=2	10	10
190	P13645	KRT10	Keratin, type I cytoskeletal 10 OS=Homo sapiens OX=9606 GN=KRT10 PE=1 SV=6	10	10
191	P69905	HBA1	Hemoglobin subunit alpha OS=Homo sapiens OX=9606 GN=HBA1 PE=1 SV=2	10	10
192	P02747	C1QC	Complement C1q subcomponent subunit C OS=Homo sapiens OX=9606 GN=C1QC PE=1 SV=3	10	10
193	Q9UGM5	FETUB	Fetuin-B OS=Homo sapiens OX=9606 GN=FETUB PE=1 SV=2	10	10
194	A0A0C4DH69	IGKV1-9	Immunoglobulin kappa variable 1-9 OS=Homo sapiens OX=9606 GN=IGKV1-9 PE=3 SV=1	10	10
195	P22891	PROZ	Vitamin K-dependent protein Z OS=Homo sapiens OX=9606 GN=PROZ PE=1 SV=2	10	10
196	A0A075B6S5	IGKV1-27	Immunoglobulin kappa variable 1-27 OS=Homo sapiens OX=9606 GN=IGKV1-27 PE=3 SV=1	10	10
197	P49908	SEPP1	Selenoprotein P OS=Homo sapiens OX=9606 GN=SELENOP PE=1 SV=3	10	10
198	Q14533	KRT81	Keratin, type II cuticular Hb1 OS=Homo sapiens OX=9606 GN=KRT81 PE=1 SV=3	10	10
199	P01718	IGLV3-27	Immunoglobulin lambda variable 3-27 OS=Homo sapiens OX=9606 GN=IGLV3-27 PE=1 SV=2	10	10
200	P08238	HSP90AB1	Heat shock protein HSP 90-beta OS=Homo sapiens OX=9606 GN=HSP90AB1 PE=1 SV=4	10	10
201	P02655	APOC2	Apolipoprotein C-II OS=Homo sapiens OX=9606 GN=APOC2 PE=1 SV=1	10	10
202	P11142	HSPA8	Heat shock cognate 71 kDa protein OS=Homo sapiens OX=9606 GN=HSPA8 PE=1 SV=1	10	10
203	P02743	APCS	Serum amyloid P-component OS=Homo sapiens OX=9606 GN=APCS PE=1 SV=2	10	10
204	P35527	KRT9	Keratin, type I cytoskeletal 9 OS=Homo sapiens OX=9606 GN=KRT9 PE=1 SV=3	10	10
205	P33908	MAN1A1	Mannosyl-oligosaccharide 1,2-alpha-mannosidase IA OS=Homo sapiens OX=9606 GN=MAN1A1 PE=1 SV=3	10	10
206	P01593	IGKV1D-33	Immunoglobulin kappa variable 1D-33 OS=Homo sapiens OX=9606 GN=IGKV1D-33 PE=1 SV=2	10	10
207	P00488	F13A1	Coagulation factor XIII A chain OS=Homo sapiens OX=9606 GN=F13A1 PE=1 SV=4	10	10
208	P01743	IGHV1-46	Immunoglobulin heavy variable 1-46 OS=Homo sapiens OX=9606 GN=IGHV1-46 PE=1 SV=2	10	10
209	P04433	IGKV3-11	Immunoglobulin kappa variable 3-11 OS=Homo sapiens OX=9606 GN=IGKV3-11 PE=1 SV=1	10	10
210	P01742	IGHV1-69	Immunoglobulin heavy variable 1-69 OS=Homo sapiens OX=9606 GN=IGHV1-69 PE=1 SV=2	10	10
211	A0A0C4DH38	IGHV5-51	Immunoglobulin heavy variable 5-51 OS=Homo sapiens OX=9606 GN=IGHV5-51 PE=3 SV=1	10	10
212	A0A075B6K0	IGLV3-16	Immunoglobulin lambda variable 3-16 OS=Homo sapiens OX=9606 GN=IGLV3-16 PE=3 SV=2	10	10
213	P09486	SPARC	SPARC OS=Homo sapiens OX=9606 GN=SPARC PE=1 SV=1	10	10
214	Q12805	EFEMP1	EGF-containing fibulin-like extracellular matrix protein 1 OS=Homo sapiens OX=9606 GN=EFEMP1 PE=1 SV=2	10	10
215	P04406	GAPDH	Glyceraldehyde-3-phosphate dehydrogenase OS=Homo sapiens OX=9606 GN=GAPDH PE=1 SV=3	10	10
216	P15814	IGLL1	Immunoglobulin lambda-like polypeptide 1 OS=Homo sapiens OX=9606 GN=IGLL1 PE=1 SV=1	10	10
217	P07437	TUBB	Tubulin beta chain OS=Homo sapiens OX=9606 GN=TUBB PE=1 SV=2	10	10
218	P61769	B2M	Beta-2-microglobulin OS=Homo sapiens OX=9606 GN=B2M PE=1 SV=1	10	10
219	P01602	IGKV1-5	Immunoglobulin kappa variable 1-5 OS=Homo sapiens OX=9606 GN=IGKV1-5 PE=1 SV=2	10	10
220	P04075	ALDOA	Fructose-bisphosphate aldolase A OS=Homo sapiens OX=9606 GN=ALDOA PE=1 SV=2	10	10
221	A0A075B6P5	IGKV2-28	Immunoglobulin kappa variable 2-28 OS=Homo sapiens OX=9606 GN=IGKV2-28 PE=3 SV=1	10	10
222	A0A087WW87	IGKV2-40	Immunoglobulin kappa variable 2-40 OS=Homo sapiens OX=9606 GN=IGKV2-40 PE=3 SV=2	10	10
223	O43866	CD5L	CD5 antigen-like OS=Homo sapiens OX=9606 GN=CD5L PE=1 SV=1	10	10
224	P08263	GSTA1	Glutathione S-transferase A1 OS=Homo sapiens OX=9606 GN=GSTA1 PE=1 SV=3	10	10
225	P06310	IGKV2-30	Immunoglobulin kappa variable 2-30 OS=Homo sapiens OX=9606 GN=IGKV2-30 PE=3 SV=2	10	10
226	P09455	RBP1	Retinol-binding protein 1 OS=Homo sapiens OX=9606 GN=RBP1 PE=1 SV=2	10	10
227	Q92743	HTRA1	Serine protease HTRA1 OS=Homo sapiens OX=9606 GN=HTRA1 PE=1 SV=1	10	10
228	A0A0B4J1X5	IGHV3-74	Immunoglobulin heavy variable 3-74 OS=Homo sapiens OX=9606 GN=IGHV3-74 PE=3 SV=1	10	10
229	P04180	LCAT	Phosphatidylcholine-sterol acyltransferase OS=Homo sapiens OX=9606 GN=LCAT PE=1 SV=1	10	10
230	P0DP01	IGHV1-8	Immunoglobulin heavy variable 1-8 OS=Homo sapiens OX=9606 GN=IGHV1-8 PE=3 SV=1	10	10
231	P01782	IGHV3-9	Immunoglobulin heavy variable 3-9 OS=Homo sapiens OX=9606 GN=IGHV3-9 PE=1 SV=2	10	10
232	P09172	DBH	Dopamine beta-hydroxylase OS=Homo sapiens OX=9606 GN=DBH PE=1 SV=3	9	9
233	A0A0C4DH29	IGHV1-3	Immunoglobulin heavy variable 1-3 OS=Homo sapiens OX=9606 GN=IGHV1-3 PE=3 SV=1	10	10
234	P0DJI8	SAA1	Serum amyloid A-1 protein OS=Homo sapiens OX=9606 GN=SAA1 PE=1 SV=1	10	10
235	P68371	TUBB4B	Tubulin beta-4B chain OS=Homo sapiens OX=9606 GN=TUBB4B PE=1 SV=1	10	10
236	Q14515	SPARCL1	SPARC-like protein 1 OS=Homo sapiens OX=9606 GN=SPARCL1 PE=1 SV=2	10	10
237	P01599	IGKV1-17	Immunoglobulin kappa variable 1-17 OS=Homo sapiens OX=9606 GN=IGKV1-17 PE=1 SV=2	10	10
238	P07195	LDHB	L-lactate dehydrogenase B chain OS=Homo sapiens OX=9606 GN=LDHB PE=1 SV=2	10	10
239	A0A075B6K2	IGLV3-12	Immunoglobulin lambda variable 3-12 OS=Homo sapiens OX=9606 GN=IGLV3-12 PE=3 SV=2	10	10
240	Q2KHM9	KIAA0753	Protein moonraker OS=Homo sapiens OX=9606 GN=KIAA0753 PE=1 SV=3	10	10
241	P11021	HSPA5	Endoplasmic reticulum chaperone BiP OS=Homo sapiens OX=9606 GN=HSPA5 PE=1 SV=2	10	10
242	P18206	VCL	Vinculin OS=Homo sapiens OX=9606 GN=VCL PE=1 SV=4	10	10
243	P01714	IGLV3-19	Immunoglobulin lambda variable 3-19 OS=Homo sapiens OX=9606 GN=IGLV3-19 PE=1 SV=2	10	10
244	P08253	MMP2	72 kDa type IV collagenase OS=Homo sapiens OX=9606 GN=MMP2 PE=1 SV=2	10	10
245	P15144	ANPEP	Aminopeptidase N OS=Homo sapiens OX=9606 GN=ANPEP PE=1 SV=4	10	10
246	Q9NPH3	IL1RAP	Interleukin-1 receptor accessory protein OS=Homo sapiens OX=9606 GN=IL1RAP PE=1 SV=2	10	10
247	P60174-1	TPI1	Isoform 2 of Triosephosphate isomerase OS=Homo sapiens OX=9606 GN=TPI1	10	10
248	Q12840	KIF5A	Kinesin heavy chain isoform 5A OS=Homo sapiens OX=9606 GN=KIF5A PE=1 SV=2	10	10
249	P02746	C1QB	Complement C1q subcomponent subunit B OS=Homo sapiens OX=9606 GN=C1QB PE=1 SV=3	10	10
250	Q16658	FSCN1	Fascin OS=Homo sapiens OX=9606 GN=FSCN1 PE=1 SV=3	10	10
251	Q15113	PCOLCE	Procollagen C-endopeptidase enhancer 1 OS=Homo sapiens OX=9606 GN=PCOLCE PE=1 SV=2	10	10
252	A0A0C4DH42	IGHV3-66	Immunoglobulin heavy variable 3-66 OS=Homo sapiens OX=9606 GN=IGHV3-66 PE=3 SV=1	10	10
253	Q14112	NID2	Nidogen-2 OS=Homo sapiens OX=9606 GN=NID2 PE=1 SV=3	10	10
254	P14618	PKM	Pyruvate kinase PKM OS=Homo sapiens OX=9606 GN=PKM PE=1 SV=4	10	10
255	P02745	C1QA	Complement C1q subcomponent subunit A OS=Homo sapiens OX=9606 GN=C1QA PE=1 SV=2	10	10
256	P61626	LYZ	Lysozyme C OS=Homo sapiens OX=9606 GN=LYZ PE=1 SV=1	10	10
257	Q6EMK4	VASN	Vasorin OS=Homo sapiens OX=9606 GN=VASN PE=1 SV=1	10	10
258	O43707	ACTN4	Alpha-actinin-4 OS=Homo sapiens OX=9606 GN=ACTN4 PE=1 SV=2	10	8
259	Q9UHG3	PCYOX1	Prenylcysteine oxidase 1 OS=Homo sapiens OX=9606 GN=PCYOX1 PE=1 SV=3	10	10
260	Q99459	CDC5L	Cell division cycle 5-like protein OS=Homo sapiens OX=9606 GN=CDC5L PE=1 SV=2	10	10
261	P01591	JCHAIN	Immunoglobulin J chain OS=Homo sapiens OX=9606 GN=JCHAIN PE=1 SV=4	10	10
262	P03971	AMH	Muellerian-inhibiting factor OS=Homo sapiens OX=9606 GN=AMH PE=1 SV=3	10	10
263	P62258	YWHAE	14-3-3 protein epsilon OS=Homo sapiens OX=9606 GN=YWHAE PE=1 SV=1	10	9
264	P01700	IGLV1-47	Immunoglobulin lambda variable 1-47 OS=Homo sapiens OX=9606 GN=IGLV1-47 PE=1 SV=2	10	10
265	P01715	IGLV3-1	Immunoglobulin lambda variable 3-1 OS=Homo sapiens OX=9606 GN=IGLV3-1 PE=1 SV=2	10	10
266	P08133	ANXA6	Annexin A6 OS=Homo sapiens OX=9606 GN=ANXA6 PE=1 SV=3	10	10
267	P00338	LDHA	L-lactate dehydrogenase A chain OS=Homo sapiens OX=9606 GN=LDHA PE=1 SV=2	10	10
268	P02452	COL1A1	Collagen alpha-1(I) chain OS=Homo sapiens OX=9606 GN=COL1A1 PE=1 SV=5	10	10
269	A0A0B4J1Y9	IGHV3-72	Immunoglobulin heavy variable 3-72 OS=Homo sapiens OX=9606 GN=IGHV3-72 PE=3 SV=1	10	10
270	P26038	MSN	Moesin OS=Homo sapiens OX=9606 GN=MSN PE=1 SV=3	10	10
271	P14625	HSP90B1	Endoplasmin OS=Homo sapiens OX=9606 GN=HSP90B1 PE=1 SV=1	10	10
272	P01764	IGHV3-23	Immunoglobulin heavy variable 3-23 OS=Homo sapiens OX=9606 GN=IGHV3-23 PE=1 SV=2	10	10
273	Q16270	IGFBP7	Insulin-like growth factor-binding protein 7 OS=Homo sapiens OX=9606 GN=IGFBP7 PE=1 SV=1	10	10
274	P48740	MASP1	Mannan-binding lectin serine protease 1 OS=Homo sapiens OX=9606 GN=MASP1 PE=1 SV=3	10	10
275	P68104	EEF1A1	Elongation factor 1-alpha 1 OS=Homo sapiens OX=9606 GN=EEF1A1 PE=1 SV=1	10	10
276	P08637	FCGR3A	Low affinity immunoglobulin gamma Fc region receptor III-A OS=Homo sapiens OX=9606 GN=FCGR3A PE=1 SV=2	10	10
277	P35443	THBS4	Thrombospondin-4 OS=Homo sapiens OX=9606 GN=THBS4 PE=1 SV=2	10	10
278	Q92820	GGH	Gamma-glutamyl hydrolase OS=Homo sapiens OX=9606 GN=GGH PE=1 SV=2	10	10
279	P13647	KRT5	Keratin, type II cytoskeletal 5 OS=Homo sapiens OX=9606 GN=KRT5 PE=1 SV=3	10	10
280	A0A0A0MS15	IGHV3-49	Immunoglobulin heavy variable 3-49 OS=Homo sapiens OX=9606 GN=IGHV3-49 PE=3 SV=1	10	10
281	P62937	PPIA	Peptidyl-prolyl cis-trans isomerase A OS=Homo sapiens OX=9606 GN=PPIA PE=1 SV=2	10	10
282	P11597	CETP	Cholesteryl ester transfer protein OS=Homo sapiens OX=9606 GN=CETP PE=1 SV=2	10	10
283	O94985	CLSTN1	Calsyntenin-1 OS=Homo sapiens OX=9606 GN=CLSTN1 PE=1 SV=1	10	10
284	P13639	EEF2	Elongation factor 2 OS=Homo sapiens OX=9606 GN=EEF2 PE=1 SV=4	10	10
285	P01701	IGLV1-51	Immunoglobulin lambda variable 1-51 OS=Homo sapiens OX=9606 GN=IGLV1-51 PE=1 SV=2	10	10
286	A0A075B6R9	IGKV2D-24	Probable non-functional immunoglobulin kappa variable 2D-24 OS=Homo sapiens OX=9606 GN=IGKV2D-24 PE=5 SV=1	10	10
287	Q147U7	SMCO1	Single-pass membrane and coiled-coil domain-containing protein 1 OS=Homo sapiens OX=9606 GN=SMCO1 PE=2 SV=2	10	10
288	Q16777	HIST2H2AC	Histone H2A type 2-C OS=Homo sapiens OX=9606 GN=HIST2H2AC PE=1 SV=4	9	10
289	Q15166	PON3	Serum paraoxonase/lactonase 3 OS=Homo sapiens OX=9606 GN=PON3 PE=1 SV=3	10	10
290	A0A0J9YXX1	IGHV5-10-1	Immunoglobulin heavy variable 5-10-1 OS=Homo sapiens OX=9606 GN=IGHV5-10-1 PE=3 SV=1	10	10
291	P19320	VCAM1	Vascular cell adhesion protein 1 OS=Homo sapiens OX=9606 GN=VCAM1 PE=1 SV=1	10	10
292	P63104	YWHAZ	14-3-3 protein zeta/delta OS=Homo sapiens OX=9606 GN=YWHAZ PE=1 SV=1	10	10
293	A0A0C4DH31	IGHV1-18	Immunoglobulin heavy variable 1-18 OS=Homo sapiens OX=9606 GN=IGHV1-18 PE=3 SV=1	10	10
294	A0A075B6I9	IGLV7-46	Immunoglobulin lambda variable 7-46 OS=Homo sapiens OX=9606 GN=IGLV7-46 PE=3 SV=4	10	10
295	Q6UXB8	PI16	Peptidase inhibitor 16 OS=Homo sapiens OX=9606 GN=PI16 PE=1 SV=1	10	10
296	P02741	CRP	C-reactive protein OS=Homo sapiens OX=9606 GN=CRP PE=1 SV=1	7	9
297	P04211	IGLV7-43	Immunoglobulin lambda variable 7-43 OS=Homo sapiens OX=9606 GN=IGLV7-43 PE=3 SV=2	10	10
298	P12259	F5	Coagulation factor V OS=Homo sapiens OX=9606 GN=F5 PE=1 SV=4	10	10
299	P23083	IGHV1-2	Immunoglobulin heavy variable 1-2 OS=Homo sapiens OX=9606 GN=IGHV1-2 PE=1 SV=2	10	10
300	O75874	IDH1	Isocitrate dehydrogenase [NADP] cytoplasmic OS=Homo sapiens OX=9606 GN=IDH1 PE=1 SV=2	9	10
301	Q9Y5Y7	LYVE1	Lymphatic vessel endothelial hyaluronic acid receptor 1 OS=Homo sapiens OX=9606 GN=LYVE1 PE=1 SV=2	10	10
302	P11226	MBL2	Mannose-binding protein C OS=Homo sapiens OX=9606 GN=MBL2 PE=1 SV=2	10	10
303	Q86UD1	OAF	Out at first protein homolog OS=Homo sapiens OX=9606 GN=OAF PE=2 SV=1	10	10
304	P15311	EZR	Ezrin OS=Homo sapiens OX=9606 GN=EZR PE=1 SV=4	10	10
305	P0DJI9	SAA2	Serum amyloid A-2 protein OS=Homo sapiens OX=9606 GN=SAA2 PE=1 SV=1	10	10
306	P19883	FST	Follistatin OS=Homo sapiens OX=9606 GN=FST PE=1 SV=2	10	10
307	P35579	MYH9	Myosin-9 OS=Homo sapiens OX=9606 GN=MYH9 PE=1 SV=4	10	10
308	Q13103	SPP2	Secreted phosphoprotein 24 OS=Homo sapiens OX=9606 GN=SPP2 PE=1 SV=1	10	10
309	P78539	SRPX	Sushi repeat-containing protein SRPX OS=Homo sapiens OX=9606 GN=SRPX PE=1 SV=1	10	10
310	P02786	TFRC	Transferrin receptor protein 1 OS=Homo sapiens OX=9606 GN=TFRC PE=1 SV=2	9	10
311	P22626	HNRNPA2B1	Heterogeneous nuclear ribonucleoproteins A2/B1 OS=Homo sapiens OX=9606 GN=HNRNPA2B1 PE=1 SV=2	10	10
312	Q9NQ79	CRTAC1	Cartilage acidic protein 1 OS=Homo sapiens OX=9606 GN=CRTAC1 PE=1 SV=2	10	10
313	O75636	FCN3	Ficolin-3 OS=Homo sapiens OX=9606 GN=FCN3 PE=1 SV=2	10	10
314	A0A0B4J1X8	IGHV3-43	Immunoglobulin heavy variable 3-43 OS=Homo sapiens OX=9606 GN=IGHV3-43 PE=3 SV=1	10	10
315	P00558	PGK1	Phosphoglycerate kinase 1 OS=Homo sapiens OX=9606 GN=PGK1 PE=1 SV=3	10	10
316	Q68DL7	C18orf63	Uncharacterized protein C18orf63 OS=Homo sapiens OX=9606 GN=C18orf63 PE=2 SV=2	10	10
317	P02538	KRT6A	Keratin, type II cytoskeletal 6A OS=Homo sapiens OX=9606 GN=KRT6A PE=1 SV=3	10	10
318	O00533	CHL1	Neural cell adhesion molecule L1-like protein OS=Homo sapiens OX=9606 GN=CHL1 PE=1 SV=4	10	10
319	P36871	PGM1	Phosphoglucomutase-1 OS=Homo sapiens OX=9606 GN=PGM1 PE=1 SV=3	10	10
320	P01034	CST3	Cystatin-C OS=Homo sapiens OX=9606 GN=CST3 PE=1 SV=1	10	10
321	P01766	IGHV3-13	Immunoglobulin heavy variable 3-13 OS=Homo sapiens OX=9606 GN=IGHV3-13 PE=1 SV=2	10	10
322	P01344	IGF2	Insulin-like growth factor II OS=Homo sapiens OX=9606 GN=IGF2 PE=1 SV=1	10	10
323	P13797	PLS3	Plastin-3 OS=Homo sapiens OX=9606 GN=PLS3 PE=1 SV=4	10	10
324	Q9HDC9	APMAP	Adipocyte plasma membrane-associated protein OS=Homo sapiens OX=9606 GN=APMAP PE=1 SV=2	10	10
325	P51512	MMP16	Matrix metalloproteinase-16 OS=Homo sapiens OX=9606 GN=MMP16 PE=1 SV=2	10	10
326	Q02818	NUCB1	Nucleobindin-1 OS=Homo sapiens OX=9606 GN=NUCB1 PE=1 SV=4	10	10
327	P30086	PEBP1	Phosphatidylethanolamine-binding protein 1 OS=Homo sapiens OX=9606 GN=PEBP1 PE=1 SV=3	10	9
328	Q5QNW6	HIST2H2BF	Histone H2B type 2-F OS=Homo sapiens OX=9606 GN=HIST2H2BF PE=1 SV=3	10	9
329	P16949	STMN1	Stathmin OS=Homo sapiens OX=9606 GN=STMN1 PE=1 SV=3	10	10
330	P03950	ANG	Angiogenin OS=Homo sapiens OX=9606 GN=ANG PE=1 SV=1	10	10
331	P09211	GSTP1	Glutathione S-transferase P OS=Homo sapiens OX=9606 GN=GSTP1 PE=1 SV=2	10	10
332	P02533	KRT14	Keratin, type I cytoskeletal 14 OS=Homo sapiens OX=9606 GN=KRT14 PE=1 SV=4	10	10
333	P32119	PRDX2	Peroxiredoxin-2 OS=Homo sapiens OX=9606 GN=PRDX2 PE=1 SV=5	10	10
334	Q99969	RARRES2	Retinoic acid receptor responder protein 2 OS=Homo sapiens OX=9606 GN=RARRES2 PE=1 SV=1	10	10
335	P49747	COMP	Cartilage oligomeric matrix protein OS=Homo sapiens OX=9606 GN=COMP PE=1 SV=2	10	10
336	A0A0C4DH34	IGHV4-28	Immunoglobulin heavy variable 4-28 OS=Homo sapiens OX=9606 GN=IGHV4-28 PE=3 SV=1	10	10
337	A0A0A0MT36	IGKV6D-21	Immunoglobulin kappa variable 6D-21 OS=Homo sapiens OX=9606 GN=IGKV6D-21 PE=3 SV=1	10	10
338	O75015	FCGR3B	Low affinity immunoglobulin gamma Fc region receptor III-B OS=Homo sapiens OX=9606 GN=FCGR3B PE=1 SV=2	10	10
339	Q06830	PRDX1	Peroxiredoxin-1 OS=Homo sapiens OX=9606 GN=PRDX1 PE=1 SV=1	10	10
340	P02545	LMNA	Prelamin-A/C OS=Homo sapiens OX=9606 GN=LMNA PE=1 SV=1	10	10
341	Q12841	FSTL1	Follistatin-related protein 1 OS=Homo sapiens OX=9606 GN=FSTL1 PE=1 SV=1	10	10
342	P01601	IGKV1D-16	Immunoglobulin kappa variable 1D-16 OS=Homo sapiens OX=9606 GN=IGKV1D-16 PE=3 SV=2	10	10
343	P01721	IGLV6-57	Immunoglobulin lambda variable 6-57 OS=Homo sapiens OX=9606 GN=IGLV6-57 PE=1 SV=2	10	10
344	P62328	TMSB4X	Thymosin beta-4 OS=Homo sapiens OX=9606 GN=TMSB4X PE=1 SV=2	10	10
345	P16070	CD44	CD44 antigen OS=Homo sapiens OX=9606 GN=CD44 PE=1 SV=3	10	10
346	A0A0B4J1U7	IGHV6-1	Immunoglobulin heavy variable 6-1 OS=Homo sapiens OX=9606 GN=IGHV6-1 PE=3 SV=1	10	10
347	P09529	INHBB	Inhibin beta B chain OS=Homo sapiens OX=9606 GN=INHBB PE=1 SV=2	10	10
348	P22692	IGFBP4	Insulin-like growth factor-binding protein 4 OS=Homo sapiens OX=9606 GN=IGFBP4 PE=1 SV=2	10	10
349	O00187	MASP2	Mannan-binding lectin serine protease 2 OS=Homo sapiens OX=9606 GN=MASP2 PE=1 SV=4	10	10
350	O95497	VNN1	Pantetheinase OS=Homo sapiens OX=9606 GN=VNN1 PE=1 SV=2	10	10
351	P27797	CALR	Calreticulin OS=Homo sapiens OX=9606 GN=CALR PE=1 SV=1	10	10
352	P54108	CRISP3	Cysteine-rich secretory protein 3 OS=Homo sapiens OX=9606 GN=CRISP3 PE=1 SV=1	10	10
353	A0A0B4J1Y8	IGLV9-49	Immunoglobulin lambda variable 9-49 OS=Homo sapiens OX=9606 GN=IGLV9-49 PE=1 SV=1	10	10
354	Q99715	COL12A1	Collagen alpha-1(XII) chain OS=Homo sapiens OX=9606 GN=COL12A1 PE=1 SV=2	10	10
355	Q96D03	DDIT4L	DNA damage-inducible transcript 4-like protein OS=Homo sapiens OX=9606 GN=DDIT4L PE=1 SV=1	10	10
356	Q9UNW1	MINPP1	Multiple inositol polyphosphate phosphatase 1 OS=Homo sapiens OX=9606 GN=MINPP1 PE=1 SV=1	10	10
357	P07359	GP1BA	Platelet glycoprotein Ib alpha chain OS=Homo sapiens OX=9606 GN=GP1BA PE=1 SV=2	10	10
358	Q6UX71	PLXDC2	Plexin domain-containing protein 2 OS=Homo sapiens OX=9606 GN=PLXDC2 PE=1 SV=1	10	10
359	P29401	TKT	Transketolase OS=Homo sapiens OX=9606 GN=TKT PE=1 SV=3	8	10
360	P55287	CDH11	Cadherin-11 OS=Homo sapiens OX=9606 GN=CDH11 PE=1 SV=2	10	10
361	A0A0C4DH35	IGHV3-35	Probable non-functional immunoglobulin heavy variable 3-35 OS=Homo sapiens OX=9606 GN=IGHV3-35 PE=5 SV=1	10	10
362	P50395	GDI2	Rab GDP dissociation inhibitor beta OS=Homo sapiens OX=9606 GN=GDI2 PE=1 SV=2	10	7
363	P55072	VCP	Transitional endoplasmic reticulum ATPase OS=Homo sapiens OX=9606 GN=VCP PE=1 SV=4	8	9
364	P04275	VWF	von Willebrand factor OS=Homo sapiens OX=9606 GN=VWF PE=1 SV=4	10	10
365	P31946	YWHAB	14-3-3 protein beta/alpha OS=Homo sapiens OX=9606 GN=YWHAB PE=1 SV=3	10	10
366	A0A087WSX0	IGLV5-45	Immunoglobulin lambda variable 5-45 OS=Homo sapiens OX=9606 GN=IGLV5-45 PE=3 SV=1	10	10
367	Q9H853	TUBA4B	Putative tubulin-like protein alpha-4B OS=Homo sapiens OX=9606 GN=TUBA4B PE=5 SV=2	10	10
368	P67936	TPM4	Tropomyosin alpha-4 chain OS=Homo sapiens OX=9606 GN=TPM4 PE=1 SV=3	10	10
369	P22314	UBA1	Ubiquitin-like modifier-activating enzyme 1 OS=Homo sapiens OX=9606 GN=UBA1 PE=1 SV=3	10	10
370	P12955	PEPD	Xaa-Pro dipeptidase OS=Homo sapiens OX=9606 GN=PEPD PE=1 SV=3	10	10
371	P82930	MRPS34	28S ribosomal protein S34, mitochondrial OS=Homo sapiens OX=9606 GN=MRPS34 PE=1 SV=2	10	10
372	A0A0B4J1V0	IGHV3-15	Immunoglobulin heavy variable 3-15 OS=Homo sapiens OX=9606 GN=IGHV3-15 PE=3 SV=1	10	10
373	P08779	KRT16	Keratin, type I cytoskeletal 16 OS=Homo sapiens OX=9606 GN=KRT16 PE=1 SV=4	10	10
374	P34096	RNASE4	Ribonuclease 4 OS=Homo sapiens OX=9606 GN=RNASE4 PE=1 SV=3	10	10
375	P13591-1	NCAM1	Isoform 2 of Neural cell adhesion molecule 1 OS=Homo sapiens OX=9606 GN=NCAM1	9	10
376	P02788	LTF	Lactotransferrin OS=Homo sapiens OX=9606 GN=LTF PE=1 SV=6	10	10
377	P0DMV9	HSPA1B	Heat shock 70 kDa protein 1B OS=Homo sapiens OX=9606 GN=HSPA1B PE=1 SV=1	10	10
378	A0A075B6I0	IGLV8-61	Immunoglobulin lambda variable 8-61 OS=Homo sapiens OX=9606 GN=IGLV8-61 PE=3 SV=7	10	10
379	P07951-2	TPM2	Isoform 2 of Tropomyosin beta chain OS=Homo sapiens OX=9606 GN=TPM2	10	10
380	P22392-2	NME2	Isoform 3 of Nucleoside diphosphate kinase B OS=Homo sapiens OX=9606 GN=NME2	10	10
381	P0DSN7	IGKV1D-37	Probable non-functional immunoglobulinn kappa variable 1D-37 OS=Homo sapiens OX=9606 GN=IGKV1D-37 PE=5 SV=1	10	10
382	Q01995	TAGLN	Transgelin OS=Homo sapiens OX=9606 GN=TAGLN PE=1 SV=4	10	10
383	Q16778	HIST2H2BE	Histone H2B type 2-E OS=Homo sapiens OX=9606 GN=HIST2H2BE PE=1 SV=3	10	9
384	P01699	IGLV1-44	Immunoglobulin lambda variable 1-44 OS=Homo sapiens OX=9606 GN=IGLV1-44 PE=1 SV=2	10	10
385	P21741	MDK	Midkine OS=Homo sapiens OX=9606 GN=MDK PE=1 SV=1	10	10
386	A0A0G2JS06	IGLV5-39	Immunoglobulin lambda variable 5-39 OS=Homo sapiens OX=9606 GN=IGLV5-39 PE=3 SV=1	10	10
387	P30101	PDIA3	Protein disulfide-isomerase A3 OS=Homo sapiens OX=9606 GN=PDIA3 PE=1 SV=4	10	9
388	P35241	RDX	Radixin OS=Homo sapiens OX=9606 GN=RDX PE=1 SV=1	10	10
389	Q8N474	SFRP1	Secreted frizzled-related protein 1 OS=Homo sapiens OX=9606 GN=SFRP1 PE=1 SV=1	10	10
390	P27348	YWHAQ	14-3-3 protein theta OS=Homo sapiens OX=9606 GN=YWHAQ PE=1 SV=1	10	9
391	P39060	COL18A1	Collagen alpha-1(XVIII) chain OS=Homo sapiens OX=9606 GN=COL18A1 PE=1 SV=5	10	10
392	P34932	HSPA4	Heat shock 70 kDa protein 4 OS=Homo sapiens OX=9606 GN=HSPA4 PE=1 SV=4	10	10
393	Q96QV6	HIST1H2AA	Histone H2A type 1-A OS=Homo sapiens OX=9606 GN=HIST1H2AA PE=1 SV=3	9	10
394	A0A0B4J1V2	IGHV2-26	Immunoglobulin heavy variable 2-26 OS=Homo sapiens OX=9606 GN=IGHV2-26 PE=3 SV=1	10	10
395	A0A0C4DH43	IGHV2-70D	Immunoglobulin heavy variable 2-70D OS=Homo sapiens OX=9606 GN=IGHV2-70D PE=3 SV=1	10	9
396	P06753-2	TPM3	Isoform 2 of Tropomyosin alpha-3 chain OS=Homo sapiens OX=9606 GN=TPM3	10	10
397	Q14195-2	DPYSL3	Isoform LCRMP-4 of Dihydropyrimidinase-related protein 3 OS=Homo sapiens OX=9606 GN=DPYSL3	10	10
398	O94819	KBTBD11	Kelch repeat and BTB domain-containing protein 11 OS=Homo sapiens OX=9606 GN=KBTBD11 PE=1 SV=1	10	10
399	P20774	OGN	Mimecan OS=Homo sapiens OX=9606 GN=OGN PE=1 SV=1	9	10
400	Q66K66	TMEM198	Transmembrane protein 198 OS=Homo sapiens OX=9606 GN=TMEM198 PE=1 SV=1	10	10
401	P61981	YWHAG	14-3-3 protein gamma OS=Homo sapiens OX=9606 GN=YWHAG PE=1 SV=2	10	9
402	Q14118	DAG1	Dystroglycan OS=Homo sapiens OX=9606 GN=DAG1 PE=1 SV=2	10	10
403	Q13822	ENPP2	Ectonucleotide pyrophosphatase/phosphodiesterase family member 2 OS=Homo sapiens OX=9606 GN=ENPP2 PE=1 SV=3	10	10
404	O95479	H6PD	GDH/6PGL endoplasmic bifunctional protein OS=Homo sapiens OX=9606 GN=H6PD PE=1 SV=2	9	10
405	P61978	HNRNPK	Heterogeneous nuclear ribonucleoprotein K OS=Homo sapiens OX=9606 GN=HNRNPK PE=1 SV=1	10	10
406	Q9Y4L1	HYOU1	Hypoxia up-regulated protein 1 OS=Homo sapiens OX=9606 GN=HYOU1 PE=1 SV=1	10	10
407	O14786	NRP1	Neuropilin-1 OS=Homo sapiens OX=9606 GN=NRP1 PE=1 SV=3	10	10
408	P00915	CA1	Carbonic anhydrase 1 OS=Homo sapiens OX=9606 GN=CA1 PE=1 SV=2	8	8
409	P04040	CAT	Catalase OS=Homo sapiens OX=9606 GN=CAT PE=1 SV=3	10	10
410	P23528	CFL1	Cofilin-1 OS=Homo sapiens OX=9606 GN=CFL1 PE=1 SV=3	10	10
411	Q01459	CTBS	Di-N-acetylchitobiase OS=Homo sapiens OX=9606 GN=CTBS PE=1 SV=1	10	10
412	A0A0C4DH24	IGKV6-21	Immunoglobulin kappa variable 6-21 OS=Homo sapiens OX=9606 GN=IGKV6-21 PE=3 SV=1	10	10
413	P01703	IGLV1-40	Immunoglobulin lambda variable 1-40 OS=Homo sapiens OX=9606 GN=IGLV1-40 PE=1 SV=2	10	10
414	P01706	IGLV2-11	Immunoglobulin lambda variable 2-11 OS=Homo sapiens OX=9606 GN=IGLV2-11 PE=1 SV=2	10	10
415	P05062	ALDOB	Fructose-bisphosphate aldolase B OS=Homo sapiens OX=9606 GN=ALDOB PE=1 SV=2	10	10
416	Q86YZ3	HRNR	Hornerin OS=Homo sapiens OX=9606 GN=HRNR PE=1 SV=2	10	10
417	P05362	ICAM1	Intercellular adhesion molecule 1 OS=Homo sapiens OX=9606 GN=ICAM1 PE=1 SV=2	10	10
418	P09493-8	TPM1	Isoform 8 of Tropomyosin alpha-1 chain OS=Homo sapiens OX=9606 GN=TPM1	10	10
419	P07237	P4HB	Protein disulfide-isomerase OS=Homo sapiens OX=9606 GN=P4HB PE=1 SV=3	10	10
420	P63313	TMSB10	Thymosin beta-10 OS=Homo sapiens OX=9606 GN=TMSB10 PE=1 SV=2	10	10
421	Q86XI8	C19orf68	Uncharacterized protein ZSWIM9 OS=Homo sapiens OX=9606 GN=ZSWIM9 PE=1 SV=2	10	10
422	P08709	F7	Coagulation factor VII OS=Homo sapiens OX=9606 GN=F7 PE=1 SV=1	10	10
423	Q14126	DSG2	Desmoglein-2 OS=Homo sapiens OX=9606 GN=DSG2 PE=1 SV=2	10	10
424	P09651	HNRNPA1	Heterogeneous nuclear ribonucleoprotein A1 OS=Homo sapiens OX=9606 GN=HNRNPA1 PE=1 SV=5	10	10
425	A0A0B4J1V6	IGHV3-73	Immunoglobulin heavy variable 3-73 OS=Homo sapiens OX=9606 GN=IGHV3-73 PE=3 SV=1	10	10
426	Q12906	ILF3	Interleukin enhancer-binding factor 3 OS=Homo sapiens OX=9606 GN=ILF3 PE=1 SV=3	9	6
427	P30041	PRDX6	Peroxiredoxin-6 OS=Homo sapiens OX=9606 GN=PRDX6 PE=1 SV=3	10	8
428	P18669	PGAM1	Phosphoglycerate mutase 1 OS=Homo sapiens OX=9606 GN=PGAM1 PE=1 SV=2	9	10
429	P15151	PVR	Poliovirus receptor OS=Homo sapiens OX=9606 GN=PVR PE=1 SV=2	10	10
430	A0A075B6H7	IGKV3-7	Probable non-functional immunoglobulin kappa variable 3-7 OS=Homo sapiens OX=9606 GN=IGKV3-7 PE=5 SV=1	10	10
431	Q8IV36	HID1	Protein HID1 OS=Homo sapiens OX=9606 GN=HID1 PE=1 SV=1	10	10
432	O75326	SEMA7A	Semaphorin-7A OS=Homo sapiens OX=9606 GN=SEMA7A PE=1 SV=1	10	10
433	Q12860	CNTN1	Contactin-1 OS=Homo sapiens OX=9606 GN=CNTN1 PE=1 SV=1	7	9
434	O75369	FLNB	Filamin-B OS=Homo sapiens OX=9606 GN=FLNB PE=1 SV=2	10	10
435	Q9NRN5	OLFML3	Olfactomedin-like protein 3 OS=Homo sapiens OX=9606 GN=OLFML3 PE=2 SV=1	10	10
436	P19022	CDH2	Cadherin-2 OS=Homo sapiens OX=9606 GN=CDH2 PE=1 SV=4	10	9
437	Q92496	CFHR4	Complement factor H-related protein 4 OS=Homo sapiens OX=9606 GN=CFHR4 PE=1 SV=3	10	10
438	P06744	GPI	Glucose-6-phosphate isomerase OS=Homo sapiens OX=9606 GN=GPI PE=1 SV=4	6	8
439	P00390	GSR	Glutathione reductase, mitochondrial OS=Homo sapiens OX=9606 GN=GSR PE=1 SV=2	9	9
440	P05019	IGF1	Insulin-like growth factor I OS=Homo sapiens OX=9606 GN=IGF1 PE=1 SV=1	10	10
441	P55268	LAMB2	Laminin subunit beta-2 OS=Homo sapiens OX=9606 GN=LAMB2 PE=1 SV=2	10	9
442	P07737	PFN1	Profilin-1 OS=Homo sapiens OX=9606 GN=PFN1 PE=1 SV=2	10	10
443	Q12884	FAP	Prolyl endopeptidase FAP OS=Homo sapiens OX=9606 GN=FAP PE=1 SV=5	10	10
444	P31150	GDI1	Rab GDP dissociation inhibitor alpha OS=Homo sapiens OX=9606 GN=GDI1 PE=1 SV=2	9	6
445	P12814	ACTN1	Alpha-actinin-1 OS=Homo sapiens OX=9606 GN=ACTN1 PE=1 SV=2	10	10
446	Q13790	APOF	Apolipoprotein F OS=Homo sapiens OX=9606 GN=APOF PE=1 SV=2	10	10
447	P13929	ENO3	Beta-enolase OS=Homo sapiens OX=9606 GN=ENO3 PE=1 SV=5	10	10
448	P55290	CDH13	Cadherin-13 OS=Homo sapiens OX=9606 GN=CDH13 PE=1 SV=1	8	10
449	P19012	KRT15	Keratin, type I cytoskeletal 15 OS=Homo sapiens OX=9606 GN=KRT15 PE=1 SV=3	8	6
450	P08294	SOD3	Extracellular superoxide dismutase [Cu-Zn] OS=Homo sapiens OX=9606 GN=SOD3 PE=1 SV=2	9	10
451	A0A075B6H9	IGLV4-69	Immunoglobulin lambda variable 4-69 OS=Homo sapiens OX=9606 GN=IGLV4-69 PE=1 SV=1	10	10
452	P09960	LTA4H	Leukotriene A-4 hydrolase OS=Homo sapiens OX=9606 GN=LTA4H PE=1 SV=2	4	4
453	P13473	LAMP2	Lysosome-associated membrane glycoprotein 2 OS=Homo sapiens OX=9606 GN=LAMP2 PE=1 SV=2	10	10
454	P07333	CSF1R	Macrophage colony-stimulating factor 1 receptor OS=Homo sapiens OX=9606 GN=CSF1R PE=1 SV=2	10	10
455	Q96SM3	CPXM1	Probable carboxypeptidase X1 OS=Homo sapiens OX=9606 GN=CPXM1 PE=2 SV=2	10	9
456	P00441	SOD1	Superoxide dismutase [Cu-Zn] OS=Homo sapiens OX=9606 GN=SOD1 PE=1 SV=2	10	10
457	P09104	ENO2	Gamma-enolase OS=Homo sapiens OX=9606 GN=ENO2 PE=1 SV=3	10	10
458	P09493-5	TPM1	Isoform 5 of Tropomyosin alpha-1 chain OS=Homo sapiens OX=9606 GN=TPM1	10	10
459	Q496Y0	LONRF3	LON peptidase N-terminal domain and RING finger protein 3 OS=Homo sapiens OX=9606 GN=LONRF3 PE=1 SV=1	10	10
460	P37837	TALDO1	Transaldolase OS=Homo sapiens OX=9606 GN=TALDO1 PE=1 SV=2	10	10
461	Q13387	MAPK8IP2	C-Jun-amino-terminal kinase-interacting protein 2 OS=Homo sapiens OX=9606 GN=MAPK8IP2 PE=1 SV=2	10	10
462	P20908	COL5A1	Collagen alpha-1(V) chain OS=Homo sapiens OX=9606 GN=COL5A1 PE=1 SV=3	10	10
463	Q9BWP8	COLEC11	Collectin-11 OS=Homo sapiens OX=9606 GN=COLEC11 PE=1 SV=1	10	10
464	P12277	CKB	Creatine kinase B-type OS=Homo sapiens OX=9606 GN=CKB PE=1 SV=1	9	7
465	Q96F07	CYFIP2	Cytoplasmic FMR1-interacting protein 2 OS=Homo sapiens OX=9606 GN=CYFIP2 PE=1 SV=2	10	10
466	P02794	FTH1	Ferritin heavy chain OS=Homo sapiens OX=9606 GN=FTH1 PE=1 SV=2	9	7
467	Q04695	KRT17	Keratin, type I cytoskeletal 17 OS=Homo sapiens OX=9606 GN=KRT17 PE=1 SV=2	6	5
468	P15531	NME1	Nucleoside diphosphate kinase A OS=Homo sapiens OX=9606 GN=NME1 PE=1 SV=1	7	8
469	P12956	XRCC6	X-ray repair cross-complementing protein 6 OS=Homo sapiens OX=9606 GN=XRCC6 PE=1 SV=2	8	9
470	P48637	GSS	Glutathione synthetase OS=Homo sapiens OX=9606 GN=GSS PE=1 SV=1	3	5
471	P04430	IGKV1-16	Immunoglobulin kappa variable 1-16 OS=Homo sapiens OX=9606 GN=IGKV1-16 PE=1 SV=2	10	10
472	P25391	LAMA1	Laminin subunit alpha-1 OS=Homo sapiens OX=9606 GN=LAMA1 PE=1 SV=2	10	9
473	P47972	NPTX2	Neuronal pentraxin-2 OS=Homo sapiens OX=9606 GN=NPTX2 PE=1 SV=2	10	10
474	P17174	GOT1	Aspartate aminotransferase, cytoplasmic OS=Homo sapiens OX=9606 GN=GOT1 PE=1 SV=3	9	10
475	Q9NP78	ABCB9	ATP-binding cassette sub-family B member 9 OS=Homo sapiens OX=9606 GN=ABCB9 PE=1 SV=1	10	10
476	P06732	CKM	Creatine kinase M-type OS=Homo sapiens OX=9606 GN=CKM PE=1 SV=2	8	9
477	P28838	LAP3	Cytosol aminopeptidase OS=Homo sapiens OX=9606 GN=LAP3 PE=1 SV=3	10	10
478	Q14103	HNRNPD	Heterogeneous nuclear ribonucleoprotein D0 OS=Homo sapiens OX=9606 GN=HNRNPD PE=1 SV=1	7	10
479	P06454	PTMA	Prothymosin alpha OS=Homo sapiens OX=9606 GN=PTMA PE=1 SV=2	9	7
480	P23470	PTPRG	Receptor-type tyrosine-protein phosphatase gamma OS=Homo sapiens OX=9606 GN=PTPRG PE=1 SV=4	8	8
481	P05060	CHGB	Secretogranin-1 OS=Homo sapiens OX=9606 GN=CHGB PE=1 SV=2	7	7
482	P13010	XRCC5	X-ray repair cross-complementing protein 5 OS=Homo sapiens OX=9606 GN=XRCC5 PE=1 SV=3	9	9
483	Q04917	YWHAH	14-3-3 protein eta OS=Homo sapiens OX=9606 GN=YWHAH PE=1 SV=4	10	9
484	Q76LX8	ADAMTS13	A disintegrin and metalloproteinase with thrombospondin motifs 13 OS=Homo sapiens OX=9606 GN=ADAMTS13 PE=1 SV=1	10	10
485	Q10588	BST1	ADP-ribosyl cyclase/cyclic ADP-ribose hydrolase 2 OS=Homo sapiens OX=9606 GN=BST1 PE=1 SV=2	10	10
486	Q13939	CCIN	Calicin OS=Homo sapiens OX=9606 GN=CCIN PE=2 SV=3	10	10
487	P22676	CALB2	Calretinin OS=Homo sapiens OX=9606 GN=CALB2 PE=2 SV=2	10	8
488	P08572	COL4A2	Collagen alpha-2(IV) chain OS=Homo sapiens OX=9606 GN=COL4A2 PE=1 SV=4	10	10
489	P01033	TIMP1	Metalloproteinase inhibitor 1 OS=Homo sapiens OX=9606 GN=TIMP1 PE=1 SV=1	10	10
490	Q92859	NEO1	Neogenin OS=Homo sapiens OX=9606 GN=NEO1 PE=1 SV=2	10	10
491	Q8IWY4	SCUBE1	Signal peptide, CUB and EGF-like domain-containing protein 1 OS=Homo sapiens OX=9606 GN=SCUBE1 PE=1 SV=3	10	10
492	Q15848	ADIPOQ	Adiponectin OS=Homo sapiens OX=9606 GN=ADIPOQ PE=1 SV=1	10	7
493	Q16706	MAN2A1	Alpha-mannosidase 2 OS=Homo sapiens OX=9606 GN=MAN2A1 PE=1 SV=2	3	8
494	A0A0A0MT89	IGKJ1	Immunoglobulin kappa joining 1 OS=Homo sapiens OX=9606 GN=IGKJ1 PE=4 SV=2	10	10
495	A0A0B4J2D9	IGKV1D-13	Immunoglobulin kappa variable 1D-13 OS=Homo sapiens OX=9606 GN=IGKV1D-13 PE=3 SV=1	10	9
496	P13598	ICAM2	Intercellular adhesion molecule 2 OS=Homo sapiens OX=9606 GN=ICAM2 PE=1 SV=2	10	10
497	Q15063-5	POSTN	Isoform 5 of Periostin OS=Homo sapiens OX=9606 GN=POSTN	9	9
498	P06858	LPL	Lipoprotein lipase OS=Homo sapiens OX=9606 GN=LPL PE=1 SV=1	10	10
499	Q13228	SELENBP1	Methanethiol oxidase OS=Homo sapiens OX=9606 GN=SELENBP1 PE=1 SV=2	2	2
500	Q99784	OLFM1	Noelin OS=Homo sapiens OX=9606 GN=OLFM1 PE=1 SV=4	9	9
501	P25786	PSMA1	Proteasome subunit alpha type-1 OS=Homo sapiens OX=9606 GN=PSMA1 PE=1 SV=1	8	6
502	P31947	SFN	14-3-3 protein sigma OS=Homo sapiens OX=9606 GN=SFN PE=1 SV=1	10	10
503	P23526	AHCY	Adenosylhomocysteinase OS=Homo sapiens OX=9606 GN=AHCY PE=1 SV=4	7	8
504	P07339	CTSD	Cathepsin D OS=Homo sapiens OX=9606 GN=CTSD PE=1 SV=1	8	9
505	P05413	FABP3	Fatty acid-binding protein, heart OS=Homo sapiens OX=9606 GN=FABP3 PE=1 SV=4	10	9
506	P84243	H3F3A	Histone H3.3 OS=Homo sapiens OX=9606 GN=H3-3A PE=1 SV=2	10	10
507	P14543	NID1	Nidogen-1 OS=Homo sapiens OX=9606 GN=NID1 PE=1 SV=3	9	10
508	P20962	PTMS	Parathymosin OS=Homo sapiens OX=9606 GN=PTMS PE=1 SV=2	5	6
509	O60664	PLIN3	Perilipin-3 OS=Homo sapiens OX=9606 GN=PLIN3 PE=1 SV=3	10	10
510	Q92626	PXDN	Peroxidasin homolog OS=Homo sapiens OX=9606 GN=PXDN PE=1 SV=2	5	9
511	Q96G03	PGM2	Phosphoglucomutase-2 OS=Homo sapiens OX=9606 GN=PGM2 PE=1 SV=4	10	9
512	P41222	PTGDS	Prostaglandin-H2 D-isomerase OS=Homo sapiens OX=9606 GN=PTGDS PE=1 SV=1	10	10
513	O14818	PSMA7	Proteasome subunit alpha type-7 OS=Homo sapiens OX=9606 GN=PSMA7 PE=1 SV=1	9	10
514	P06702	S100A9	Protein S100-A9 OS=Homo sapiens OX=9606 GN=S100A9 PE=1 SV=1	10	10
515	Q92954	PRG4	Proteoglycan 4 OS=Homo sapiens OX=9606 GN=PRG4 PE=1 SV=3	9	10
516	Q13838	DDX39B	Spliceosome RNA helicase DDX39B OS=Homo sapiens OX=9606 GN=DDX39B PE=1 SV=1	8	8
517	Q7Z7G0	ABI3BP	Target of Nesh-SH3 OS=Homo sapiens OX=9606 GN=ABI3BP PE=1 SV=1	10	10
518	Q96P31	FCRL3	Fc receptor-like protein 3 OS=Homo sapiens OX=9606 GN=FCRL3 PE=1 SV=1	10	10
519	P09382	LGALS1	Galectin-1 OS=Homo sapiens OX=9606 GN=LGALS1 PE=1 SV=2	9	9
520	P78417	GSTO1	Glutathione S-transferase omega-1 OS=Homo sapiens OX=9606 GN=GSTO1 PE=1 SV=2	9	7
521	Q4G0P3	HYDIN	Hydrocephalus-inducing protein homolog OS=Homo sapiens OX=9606 GN=HYDIN PE=1 SV=3	10	10
522	Q01105-2	SET	Isoform 2 of Protein SET OS=Homo sapiens OX=9606 GN=SET	7	4
523	Q8N6C8	LILRA3	Leukocyte immunoglobulin-like receptor subfamily A member 3 OS=Homo sapiens OX=9606 GN=LILRA3 PE=1 SV=3	9	9
524	P19338	NCL	Nucleolin OS=Homo sapiens OX=9606 GN=NCL PE=1 SV=3	10	8
525	O95477	ABCA1	Phospholipid-transporting ATPase ABCA1 OS=Homo sapiens OX=9606 GN=ABCA1 PE=1 SV=3	10	10
526	O75460	ERN1	Serine/threonine-protein kinase/endoribonuclease IRE1 OS=Homo sapiens OX=9606 GN=ERN1 PE=1 SV=2	10	10
527	Q9Y566	SHANK1	SH3 and multiple ankyrin repeat domains protein 1 OS=Homo sapiens OX=9606 GN=SHANK1 PE=1 SV=2	10	10
528	Q9BUF5	TUBB6	Tubulin beta-6 chain OS=Homo sapiens OX=9606 GN=TUBB6 PE=1 SV=1	10	10
529	P08758	ANXA5	Annexin A5 OS=Homo sapiens OX=9606 GN=ANXA5 PE=1 SV=2	5	5
530	P49913	CAMP	Cathelicidin antimicrobial peptide OS=Homo sapiens OX=9606 GN=CAMP PE=1 SV=1	10	10
531	P09972	ALDOC	Fructose-bisphosphate aldolase C OS=Homo sapiens OX=9606 GN=ALDOC PE=1 SV=2	10	10
532	P20700	LMNB1	Lamin-B1 OS=Homo sapiens OX=9606 GN=LMNB1 PE=1 SV=2	10	10
533	P11047	LAMC1	Laminin subunit gamma-1 OS=Homo sapiens OX=9606 GN=LAMC1 PE=1 SV=3	10	10
534	P40925	MDH1	Malate dehydrogenase, cytoplasmic OS=Homo sapiens OX=9606 GN=MDH1 PE=1 SV=4	10	10
535	P23284	PPIB	Peptidyl-prolyl cis-trans isomerase B OS=Homo sapiens OX=9606 GN=PPIB PE=1 SV=2	7	9
536	P00352	ALDH1A1	Retinal dehydrogenase 1 OS=Homo sapiens OX=9606 GN=ALDH1A1 PE=1 SV=2	9	10
537	Q9P2S5	WRAP73	WD repeat-containing protein WRAP73 OS=Homo sapiens OX=9606 GN=WRAP73 PE=1 SV=1	8	10
538	P23396	RPS3	40S ribosomal protein S3 OS=Homo sapiens OX=9606 GN=RPS3 PE=1 SV=2	10	10
539	P08195	SLC3A2	4F2 cell-surface antigen heavy chain OS=Homo sapiens OX=9606 GN=SLC3A2 PE=1 SV=3	9	9
540	O43150	ASAP2	Arf-GAP with SH3 domain, ANK repeat and PH domain-containing protein 2 OS=Homo sapiens OX=9606 GN=ASAP2 PE=1 SV=3	9	8
541	P43121	MCAM	Cell surface glycoprotein MUC18 OS=Homo sapiens OX=9606 GN=MCAM PE=1 SV=2	6	7
542	P39059	COL15A1	Collagen alpha-1(XV) chain OS=Homo sapiens OX=9606 GN=COL15A1 PE=1 SV=2	7	7
543	P27487	DPP4	Dipeptidyl peptidase 4 OS=Homo sapiens OX=9606 GN=DPP4 PE=1 SV=2	9	10
544	O94769	ECM2	Extracellular matrix protein 2 OS=Homo sapiens OX=9606 GN=ECM2 PE=2 SV=1	6	6
545	P35555	FBN1	Fibrillin-1 OS=Homo sapiens OX=9606 GN=FBN1 PE=1 SV=4	10	10
546	A0A075B6I1	IGLV4-60	Immunoglobulin lambda variable 4-60 OS=Homo sapiens OX=9606 GN=IGLV4-60 PE=3 SV=1	10	10
547	Q99497	PARK7	Protein/nucleic acid deglycase DJ-1 OS=Homo sapiens OX=9606 GN=PARK7 PE=1 SV=2	9	10
548	P07998	RNASE1	Ribonuclease pancreatic OS=Homo sapiens OX=9606 GN=RNASE1 PE=1 SV=4	9	8
549	Q9NUQ6	SPATS2L	SPATS2-like protein OS=Homo sapiens OX=9606 GN=SPATS2L PE=1 SV=2	9	9
550	O75347	TBCA	Tubulin-specific chaperone A OS=Homo sapiens OX=9606 GN=TBCA PE=1 SV=3	9	10
551	Q5TCS8	AK9	Adenylate kinase 9 OS=Homo sapiens OX=9606 GN=AK9 PE=1 SV=2	10	10
552	Q8IZF2	ADGRF5	Adhesion G protein-coupled receptor F5 OS=Homo sapiens OX=9606 GN=ADGRF5 PE=1 SV=3	9	10
553	P60842	EIF4A1	Eukaryotic initiation factor 4A-I OS=Homo sapiens OX=9606 GN=EIF4A1 PE=1 SV=1	10	7
554	Q9BTV5	FSD1	Fibronectin type III and SPRY domain-containing protein 1 OS=Homo sapiens OX=9606 GN=FSD1 PE=1 SV=1	10	10
555	Q01973	ROR1	Inactive tyrosine-protein kinase transmembrane receptor ROR1 OS=Homo sapiens OX=9606 GN=ROR1 PE=1 SV=2	10	10
556	P05111	INHA	Inhibin alpha chain OS=Homo sapiens OX=9606 GN=INHA PE=1 SV=1	8	9
557	P19021	PAM	Peptidyl-glycine alpha-amidating monooxygenase OS=Homo sapiens OX=9606 GN=PAM PE=1 SV=2	9	7
558	Q9BTY2	FUCA2	Plasma alpha-L-fucosidase OS=Homo sapiens OX=9606 GN=FUCA2 PE=1 SV=2	6	8
559	Q06323	PSME1	Proteasome activator complex subunit 1 OS=Homo sapiens OX=9606 GN=PSME1 PE=1 SV=1	10	10
560	Q8IWE2	FAM114A1	Protein NOXP20 OS=Homo sapiens OX=9606 GN=FAM114A1 PE=1 SV=2	10	10
561	Q96G04	EEF2KMT	Protein-lysine N-methyltransferase EEF2KMT OS=Homo sapiens OX=9606 GN=EEF2KMT PE=1 SV=2	10	10
562	P55786	NPEPPS	Puromycin-sensitive aminopeptidase OS=Homo sapiens OX=9606 GN=NPEPPS PE=1 SV=2	6	9
563	Q5HYK7	SH3D19	SH3 domain-containing protein 19 OS=Homo sapiens OX=9606 GN=SH3D19 PE=1 SV=2	9	8
564	P10599	TXN	Thioredoxin OS=Homo sapiens OX=9606 GN=TXN PE=1 SV=3	10	9
565	P52209	PGD	6-phosphogluconate dehydrogenase, decarboxylating OS=Homo sapiens OX=9606 GN=PGD PE=1 SV=3	10	10
566	Q9Y646	CPQ	Carboxypeptidase Q OS=Homo sapiens OX=9606 GN=CPQ PE=1 SV=1	10	10
567	P11717	IGF2R	Cation-independent mannose-6-phosphate receptor OS=Homo sapiens OX=9606 GN=IGF2R PE=1 SV=3	10	10
568	P02462	COL4A1	Collagen alpha-1(IV) chain OS=Homo sapiens OX=9606 GN=COL4A1 PE=1 SV=4	10	10
569	Q96KP4	CNDP2	Cytosolic non-specific dipeptidase OS=Homo sapiens OX=9606 GN=CNDP2 PE=1 SV=2	10	9
570	Q7Z6Z7	HUWE1	E3 ubiquitin-protein ligase HUWE1 OS=Homo sapiens OX=9606 GN=HUWE1 PE=1 SV=3	10	10
571	P35052	GPC1	Glypican-1 OS=Homo sapiens OX=9606 GN=GPC1 PE=1 SV=2	6	8
572	P16402	HIST1H1D	Histone H1.3 OS=Homo sapiens OX=9606 GN=H1-3 PE=1 SV=2	10	10
573	O75144	ICOSLG	ICOS ligand OS=Homo sapiens OX=9606 GN=ICOSLG PE=1 SV=2	10	10
574	A0A075B6I4	IGLV10-54	Immunoglobulin lambda variable 10-54 OS=Homo sapiens OX=9606 GN=IGLV10-54 PE=3 SV=1	10	9
575	A0A075B6J9	IGLV2-18	Immunoglobulin lambda variable 2-18 OS=Homo sapiens OX=9606 GN=IGLV2-18 PE=3 SV=2	10	9
576	Q05682-4	CALD1	Isoform 4 of Caldesmon OS=Homo sapiens OX=9606 GN=CALD1	1	0
577	P13667	PDIA4	Protein disulfide-isomerase A4 OS=Homo sapiens OX=9606 GN=PDIA4 PE=1 SV=2	7	6
578	Q86VB7	CD163	Scavenger receptor cysteine-rich type 1 protein M130 OS=Homo sapiens OX=9606 GN=CD163 PE=1 SV=2	9	9
579	Q03167	TGFBR3	Transforming growth factor beta receptor type 3 OS=Homo sapiens OX=9606 GN=TGFBR3 PE=1 SV=3	6	6
580	Q14376	GALE	UDP-glucose 4-epimerase OS=Homo sapiens OX=9606 GN=GALE PE=1 SV=2	10	10
581	O75083	WDR1	WD repeat-containing protein 1 OS=Homo sapiens OX=9606 GN=WDR1 PE=1 SV=4	10	10
582	Q9NQH7	XPNPEP3	Xaa-Pro aminopeptidase 3 OS=Homo sapiens OX=9606 GN=XPNPEP3 PE=1 SV=1	10	10
583	Q8IUX7	AEBP1	Adipocyte enhancer-binding protein 1 OS=Homo sapiens OX=9606 GN=AEBP1 PE=1 SV=1	7	8
584	P05067	APP	Amyloid-beta precursor protein OS=Homo sapiens OX=9606 GN=APP PE=1 SV=3	6	9
585	P13727	PRG2	Bone marrow proteoglycan OS=Homo sapiens OX=9606 GN=PRG2 PE=1 SV=2	10	10
586	P62826	RAN	GTP-binding nuclear protein Ran OS=Homo sapiens OX=9606 GN=RAN PE=1 SV=3	8	9
587	P07910	HNRNPC	Heterogeneous nuclear ribonucleoproteins C1/C2 OS=Homo sapiens OX=9606 GN=HNRNPC PE=1 SV=4	10	10
588	P04439	HLA-A	HLA class I histocompatibility antigen, A alpha chain OS=Homo sapiens OX=9606 GN=HLA-A PE=1 SV=2	9	10
589	P01705	IGLV2-23	Immunoglobulin lambda variable 2-23 OS=Homo sapiens OX=9606 GN=IGLV2-23 PE=1 SV=2	10	10
590	Q99729-3	HNRNPAB	Isoform 3 of Heterogeneous nuclear ribonucleoprotein A/B OS=Homo sapiens OX=9606 GN=HNRNPAB	9	9
591	Q9UJJ9	GNPTG	N-acetylglucosamine-1-phosphotransferase subunit gamma OS=Homo sapiens OX=9606 GN=GNPTG PE=1 SV=1	10	10
592	O60462	NRP2	Neuropilin-2 OS=Homo sapiens OX=9606 GN=NRP2 PE=1 SV=3	9	8
593	Q9H254	SPTBN4	Spectrin beta chain, non-erythrocytic 4 OS=Homo sapiens OX=9606 GN=SPTBN4 PE=1 SV=2	10	10
594	P08123	COL1A2	Collagen alpha-2(I) chain OS=Homo sapiens OX=9606 GN=COL1A2 PE=1 SV=7	10	10
595	Q9UNN8	PROCR	Endothelial protein C receptor OS=Homo sapiens OX=9606 GN=PROCR PE=1 SV=1	10	10
596	Q15485	FCN2	Ficolin-2 OS=Homo sapiens OX=9606 GN=FCN2 PE=1 SV=2	9	10
597	O14498	ISLR	Immunoglobulin superfamily containing leucine-rich repeat protein OS=Homo sapiens OX=9606 GN=ISLR PE=2 SV=1	10	10
598	P51460	INSL3	Insulin-like 3 OS=Homo sapiens OX=9606 GN=INSL3 PE=1 SV=2	7	10
599	Q99996-1	AKAP9	Isoform 1 of A-kinase anchor protein 9 OS=Homo sapiens OX=9606 GN=AKAP9	10	10
600	Q13201	MMRN1	Multimerin-1 OS=Homo sapiens OX=9606 GN=MMRN1 PE=1 SV=3	9	10
601	P59665	DEFA1	Neutrophil defensin 1 OS=Homo sapiens OX=9606 GN=DEFA1 PE=1 SV=1	10	10
602	Q02790	FKBP4	Peptidyl-prolyl cis-trans isomerase FKBP4 OS=Homo sapiens OX=9606 GN=FKBP4 PE=1 SV=3	9	7
603	P25788	PSMA3	Proteasome subunit alpha type-3 OS=Homo sapiens OX=9606 GN=PSMA3 PE=1 SV=2	6	9
604	P10586	PTPRF	Receptor-type tyrosine-protein phosphatase F OS=Homo sapiens OX=9606 GN=PTPRF PE=1 SV=2	6	6
605	P07477	PRSS1	Trypsin-1 OS=Homo sapiens OX=9606 GN=PRSS1 PE=1 SV=1	10	10
606	P54289	CACNA2D1	Voltage-dependent calcium channel subunit alpha-2/delta-1 OS=Homo sapiens OX=9606 GN=CACNA2D1 PE=1 SV=3	10	10
607	O15144	ARPC2	Actin-related protein 2/3 complex subunit 2 OS=Homo sapiens OX=9606 GN=ARPC2 PE=1 SV=1	10	10
608	P54802	NAGLU	Alpha-N-acetylglucosaminidase OS=Homo sapiens OX=9606 GN=NAGLU PE=1 SV=2	4	3
609	P55056	APOC4	Apolipoprotein C-IV OS=Homo sapiens OX=9606 GN=APOC4 PE=1 SV=1	10	10
610	P12830	CDH1	Cadherin-1 OS=Homo sapiens OX=9606 GN=CDH1 PE=1 SV=3	10	10
611	O00299	CLIC1	Chloride intracellular channel protein 1 OS=Homo sapiens OX=9606 GN=CLIC1 PE=1 SV=4	9	8
612	P02461	COL3A1	Collagen alpha-1(III) chain OS=Homo sapiens OX=9606 GN=COL3A1 PE=1 SV=4	10	10
613	A0A087WSZ0	IGKV1D-8	Immunoglobulin kappa variable 1D-8 OS=Homo sapiens OX=9606 GN=IGKV1D-8 PE=3 SV=6	6	8
614	Q13308	PTK7	Inactive tyrosine-protein kinase 7 OS=Homo sapiens OX=9606 GN=PTK7 PE=1 SV=2	3	7
615	O00339-2	MATN2	Isoform 2 of Matrilin-2 OS=Homo sapiens OX=9606 GN=MATN2	10	8
616	P60660	MYL6	Myosin light polypeptide 6 OS=Homo sapiens OX=9606 GN=MYL6 PE=1 SV=2	10	10
617	P49321	NASP	Nuclear autoantigenic sperm protein OS=Homo sapiens OX=9606 GN=NASP PE=1 SV=2	10	10
618	P60900	PSMA6	Proteasome subunit alpha type-6 OS=Homo sapiens OX=9606 GN=PSMA6 PE=1 SV=1	6	4
619	Q86TB9	PATL1	Protein PAT1 homolog 1 OS=Homo sapiens OX=9606 GN=PATL1 PE=1 SV=2	10	10
620	Q6GMV3	PTRHD1	Putative peptidyl-tRNA hydrolase PTRHD1 OS=Homo sapiens OX=9606 GN=PTRHD1 PE=1 SV=1	9	10
621	Q14247	CTTN	Src substrate cortactin OS=Homo sapiens OX=9606 GN=CTTN PE=1 SV=2	9	10
622	P35442	THBS2	Thrombospondin-2 OS=Homo sapiens OX=9606 GN=THBS2 PE=1 SV=2	7	9
623	Q9Y6L7	TLL2	Tolloid-like protein 2 OS=Homo sapiens OX=9606 GN=TLL2 PE=1 SV=1	9	10
624	P20851	C4BPB	C4b-binding protein beta chain OS=Homo sapiens OX=9606 GN=C4BPB PE=1 SV=1	10	10
625	P04080	CSTB	Cystatin-B OS=Homo sapiens OX=9606 GN=CSTB PE=1 SV=2	10	10
626	P21291	CSRP1	Cysteine and glycine-rich protein 1 OS=Homo sapiens OX=9606 GN=CSRP1 PE=1 SV=3	8	8
627	A8MQ27	NEURL1B	E3 ubiquitin-protein ligase NEURL1B OS=Homo sapiens OX=9606 GN=NEURL1B PE=1 SV=1	10	10
628	Q9HC38	GLOD4	Glyoxalase domain-containing protein 4 OS=Homo sapiens OX=9606 GN=GLOD4 PE=1 SV=1	10	10
629	A0A0J9YX35	IGHV3-64D	Immunoglobulin heavy variable 3-64D OS=Homo sapiens OX=9606 GN=IGHV3-64D PE=3 SV=1	10	10
630	Q15181	PPA1	Inorganic pyrophosphatase OS=Homo sapiens OX=9606 GN=PPA1 PE=1 SV=2	10	10
631	Q12905	ILF2	Interleukin enhancer-binding factor 2 OS=Homo sapiens OX=9606 GN=ILF2 PE=1 SV=2	5	2
632	P40189	IL6ST	Interleukin-6 receptor subunit beta OS=Homo sapiens OX=9606 GN=IL6ST PE=1 SV=2	2	0
633	P11279	LAMP1	Lysosome-associated membrane glycoprotein 1 OS=Homo sapiens OX=9606 GN=LAMP1 PE=1 SV=3	9	9
634	Q8N4C6	NIN	Ninein OS=Homo sapiens OX=9606 GN=NIN PE=1 SV=4	10	10
635	P06748	NPM1	Nucleophosmin OS=Homo sapiens OX=9606 GN=NPM1 PE=1 SV=2	5	6
636	P05109	S100A8	Protein S100-A8 OS=Homo sapiens OX=9606 GN=S100A8 PE=1 SV=1	7	4
637	P49756	RBM25	RNA-binding protein 25 OS=Homo sapiens OX=9606 GN=RBM25 PE=1 SV=3	9	9
638	P49189	ALDH9A1	4-trimethylaminobutyraldehyde dehydrogenase OS=Homo sapiens OX=9606 GN=ALDH9A1 PE=1 SV=3	9	10
639	P05186	ALPL	Alkaline phosphatase, tissue-nonspecific isozyme OS=Homo sapiens OX=9606 GN=ALPL PE=1 SV=4	8	8
640	P04745	AMY1A	Alpha-amylase 1 OS=Homo sapiens OX=9606 GN=AMY1A PE=1 SV=2	8	8
641	Q9C0B1	FTO	Alpha-ketoglutarate-dependent dioxygenase FTO OS=Homo sapiens OX=9606 GN=FTO PE=1 SV=3	10	10
642	P0DP25	CALM3	Calmodulin-3 OS=Homo sapiens OX=9606 GN=CALM3 PE=1 SV=1	5	7
643	P16152	CBR1	Carbonyl reductase [NADPH] 1 OS=Homo sapiens OX=9606 GN=CBR1 PE=1 SV=3	10	8
644	O75339	CILP	Cartilage intermediate layer protein 1 OS=Homo sapiens OX=9606 GN=CILP PE=1 SV=4	6	7
645	P07585	DCN	Decorin OS=Homo sapiens OX=9606 GN=DCN PE=1 SV=1	10	10
646	P26641	EEF1G	Elongation factor 1-gamma OS=Homo sapiens OX=9606 GN=EEF1G PE=1 SV=3	6	4
647	P02792	FTL	Ferritin light chain OS=Homo sapiens OX=9606 GN=FTL PE=1 SV=2	3	2
648	P16930	FAH	Fumarylacetoacetase OS=Homo sapiens OX=9606 GN=FAH PE=1 SV=2	8	6
649	P32455	GBP1	Guanylate-binding protein 1 OS=Homo sapiens OX=9606 GN=GBP1 PE=1 SV=2	10	10
650	P40926	MDH2	Malate dehydrogenase, mitochondrial OS=Homo sapiens OX=9606 GN=MDH2 PE=1 SV=3	10	10
651	Q16853	AOC3	Membrane primary amine oxidase OS=Homo sapiens OX=9606 GN=AOC3 PE=1 SV=3	9	10
652	Q86U17	SERPINA11	Serpin A11 OS=Homo sapiens OX=9606 GN=SERPINA11 PE=2 SV=2	3	2
653	Q9BUD6	SPON2	Spondin-2 OS=Homo sapiens OX=9606 GN=SPON2 PE=1 SV=3	10	8
654	O14746	TERT	Telomerase reverse transcriptase OS=Homo sapiens OX=9606 GN=TERT PE=1 SV=1	10	10
655	P37802	TAGLN2	Transgelin-2 OS=Homo sapiens OX=9606 GN=TAGLN2 PE=1 SV=3	2	1
656	O60241	ADGRB2	Adhesion G protein-coupled receptor B2 OS=Homo sapiens OX=9606 GN=ADGRB2 PE=1 SV=2	10	10
657	P15121	AKR1B1	Aldo-keto reductase family 1 member B1 OS=Homo sapiens OX=9606 GN=AKR1B1 PE=1 SV=3	5	4
658	P00966	ASS1	Argininosuccinate synthase OS=Homo sapiens OX=9606 GN=ASS1 PE=1 SV=2	4	6
659	P53396	ACLY	ATP-citrate synthase OS=Homo sapiens OX=9606 GN=ACLY PE=1 SV=3	5	1
660	P55285	CDH6	Cadherin-6 OS=Homo sapiens OX=9606 GN=CDH6 PE=1 SV=1	0	1
661	P07858	CTSB	Cathepsin B OS=Homo sapiens OX=9606 GN=CTSB PE=1 SV=3	1	1
662	Q9UBX1	CTSF	Cathepsin F OS=Homo sapiens OX=9606 GN=CTSF PE=1 SV=1	7	9
663	Q6YHK3	CD109	CD109 antigen OS=Homo sapiens OX=9606 GN=CD109 PE=1 SV=2	7	9
664	P24387	CRHBP	Corticotropin-releasing factor-binding protein OS=Homo sapiens OX=9606 GN=CRHBP PE=1 SV=2	7	10
665	Q16555	DPYSL2	Dihydropyrimidinase-related protein 2 OS=Homo sapiens OX=9606 GN=DPYSL2 PE=1 SV=1	6	5
666	Q6P179	ERAP2	Endoplasmic reticulum aminopeptidase 2 OS=Homo sapiens OX=9606 GN=ERAP2 PE=1 SV=2	7	4
667	Q9UBQ6	EXTL2	Exostosin-like 2 OS=Homo sapiens OX=9606 GN=EXTL2 PE=1 SV=1	7	6
668	P30043	BLVRB	Flavin reductase (NADPH) OS=Homo sapiens OX=9606 GN=BLVRB PE=1 SV=3	4	8
669	O15217	GSTA4	Glutathione S-transferase A4 OS=Homo sapiens OX=9606 GN=GSTA4 PE=1 SV=1	1	1
670	Q8NBJ4	GOLM1	Golgi membrane protein 1 OS=Homo sapiens OX=9606 GN=GOLM1 PE=1 SV=1	10	10
671	P01704	IGLV2-14	Immunoglobulin lambda variable 2-14 OS=Homo sapiens OX=9606 GN=IGLV2-14 PE=1 SV=2	10	10
672	A0A075B6J1	IGLV5-37	Immunoglobulin lambda variable 5-37 OS=Homo sapiens OX=9606 GN=IGLV5-37 PE=3 SV=1	8	10
673	P24593	IGFBP5	Insulin-like growth factor-binding protein 5 OS=Homo sapiens OX=9606 GN=IGFBP5 PE=1 SV=1	5	5
674	Q8N1N4	KRT78	Keratin, type II cytoskeletal 78 OS=Homo sapiens OX=9606 GN=KRT78 PE=1 SV=2	10	9
675	P07942	LAMB1	Laminin subunit beta-1 OS=Homo sapiens OX=9606 GN=LAMB1 PE=1 SV=2	7	3
676	O14960	LECT2	Leukocyte cell-derived chemotaxin-2 OS=Homo sapiens OX=9606 GN=LECT2 PE=1 SV=2	10	10
677	P10721	KIT	Mast/stem cell growth factor receptor Kit OS=Homo sapiens OX=9606 GN=KIT PE=1 SV=1	4	6
678	Q7Z7M0	MEGF8	Multiple epidermal growth factor-like domains protein 8 OS=Homo sapiens OX=9606 GN=MEGF8 PE=1 SV=2	6	8
679	Q02809	PLOD1	Procollagen-lysine,2-oxoglutarate 5-dioxygenase 1 OS=Homo sapiens OX=9606 GN=PLOD1 PE=1 SV=2	2	6
680	Q99436	PSMB7	Proteasome subunit beta type-7 OS=Homo sapiens OX=9606 GN=PSMB7 PE=1 SV=1	6	9
681	Q13813	SPTAN1	Spectrin alpha chain, non-erythrocytic 1 OS=Homo sapiens OX=9606 GN=SPTAN1 PE=1 SV=3	1	1
682	Q9BYE2	TMPRSS13	Transmembrane protease serine 13 OS=Homo sapiens OX=9606 GN=TMPRSS13 PE=2 SV=5	10	10
683	Q16851	UGP2	UTP--glucose-1-phosphate uridylyltransferase OS=Homo sapiens OX=9606 GN=UGP2 PE=1 SV=5	7	5
684	P05388	RPLP0	60S acidic ribosomal protein P0 OS=Homo sapiens OX=9606 GN=RPLP0 PE=1 SV=1	8	7
685	P12821	ACE	Angiotensin-converting enzyme OS=Homo sapiens OX=9606 GN=ACE PE=1 SV=1	0	1
686	Q9BPW4	APOL4	Apolipoprotein L4 OS=Homo sapiens OX=9606 GN=APOL4 PE=2 SV=3	10	10
687	P00918	CA2	Carbonic anhydrase 2 OS=Homo sapiens OX=9606 GN=CA2 PE=1 SV=2	3	2
688	Q9Y240	CLEC11A	C-type lectin domain family 11 member A OS=Homo sapiens OX=9606 GN=CLEC11A PE=1 SV=1	7	10
689	P13716	ALAD	Delta-aminolevulinic acid dehydratase OS=Homo sapiens OX=9606 GN=ALAD PE=1 SV=1	6	6
690	P17813	ENG	Endoglin OS=Homo sapiens OX=9606 GN=ENG PE=1 SV=2	4	8
691	P51858	HDGF	Hepatoma-derived growth factor OS=Homo sapiens OX=9606 GN=HDGF PE=1 SV=1	5	4
692	Q00839	HNRNPU	Heterogeneous nuclear ribonucleoprotein U OS=Homo sapiens OX=9606 GN=HNRNPU PE=1 SV=6	6	4
693	P12081	HARS1	Histidine--tRNA ligase, cytoplasmic OS=Homo sapiens OX=9606 GN=HARS1 PE=1 SV=2	6	8
694	P16401	HIST1H1B	Histone H1.5 OS=Homo sapiens OX=9606 GN=H1-5 PE=1 SV=3	7	9
695	P50502	ST13	Hsc70-interacting protein OS=Homo sapiens OX=9606 GN=ST13 PE=1 SV=2	5	3
696	P35916-1	FLT4	Isoform 2 of Vascular endothelial growth factor receptor 3 OS=Homo sapiens OX=9606 GN=FLT4	2	5
697	P80188	LCN2	Neutrophil gelatinase-associated lipocalin OS=Homo sapiens OX=9606 GN=LCN2 PE=1 SV=2	9	8
698	Q9NTK5	OLA1	Obg-like ATPase 1 OS=Homo sapiens OX=9606 GN=OLA1 PE=1 SV=2	7	2
699	Q15365	PCBP1	Poly(rC)-binding protein 1 OS=Homo sapiens OX=9606 GN=PCBP1 PE=1 SV=2	5	6
700	A0A0C4DH36	IGHV3-38	Probable non-functional immunoglobulin heavy variable 3-38 OS=Homo sapiens OX=9606 GN=IGHV3-38 PE=5 SV=1	7	10
701	P20618	PSMB1	Proteasome subunit beta type-1 OS=Homo sapiens OX=9606 GN=PSMB1 PE=1 SV=2	9	10
702	Q12913	PTPRJ	Receptor-type tyrosine-protein phosphatase eta OS=Homo sapiens OX=9606 GN=PTPRJ PE=1 SV=3	7	8
703	P52565	ARHGDIA	Rho GDP-dissociation inhibitor 1 OS=Homo sapiens OX=9606 GN=ARHGDIA PE=1 SV=3	9	4
704	Q9NQQ7	SLC35C2	Solute carrier family 35 member C2 OS=Homo sapiens OX=9606 GN=SLC35C2 PE=1 SV=2	10	10
705	P24821	TNC	Tenascin OS=Homo sapiens OX=9606 GN=TNC PE=1 SV=3	4	5
706	A4UGR9	XIRP2	Xin actin-binding repeat-containing protein 2 OS=Homo sapiens OX=9606 GN=XIRP2 PE=1 SV=2	10	10
707	P05387	RPLP2	60S acidic ribosomal protein P2 OS=Homo sapiens OX=9606 GN=RPLP2 PE=1 SV=1	5	6
708	Q01518	CAP1	Adenylyl cyclase-associated protein 1 OS=Homo sapiens OX=9606 GN=CAP1 PE=1 SV=5	4	3
709	P11766	ADH5	Alcohol dehydrogenase class-3 OS=Homo sapiens OX=9606 GN=ADH5 PE=1 SV=4	10	10
710	Q13740	ALCAM	CD166 antigen OS=Homo sapiens OX=9606 GN=ALCAM PE=1 SV=2	8	10
711	P27695	APEX1	DNA-(apurinic or apyrimidinic site) lyase OS=Homo sapiens OX=9606 GN=APEX1 PE=1 SV=2	8	8
712	P63241	EIF5A	Eukaryotic translation initiation factor 5A-1 OS=Homo sapiens OX=9606 GN=EIF5A PE=1 SV=2	9	8
713	Q01469	FABP5	Fatty acid-binding protein 5 OS=Homo sapiens OX=9606 GN=FABP5 PE=1 SV=3	2	2
714	O14979	HNRNPDL	Heterogeneous nuclear ribonucleoprotein D-like OS=Homo sapiens OX=9606 GN=HNRNPDL PE=1 SV=3	2	3
715	P01889	HLA-B	HLA class I histocompatibility antigen, B alpha chain OS=Homo sapiens OX=9606 GN=HLA-B PE=1 SV=3	7	7
716	A0A0C4DH33	IGHV1-24	Immunoglobulin heavy variable 1-24 OS=Homo sapiens OX=9606 GN=IGHV1-24 PE=3 SV=1	9	9
717	P55103	INHBC	Inhibin beta C chain OS=Homo sapiens OX=9606 GN=INHBC PE=2 SV=1	10	10
718	Q14847	LASP1	LIM and SH3 domain protein 1 OS=Homo sapiens OX=9606 GN=LASP1 PE=1 SV=2	4	2
719	P27816	MAP4	Microtubule-associated protein 4 OS=Homo sapiens OX=9606 GN=MAP4 PE=1 SV=3	2	2
720	O94760	DDAH1	N(G),N(G)-dimethylarginine dimethylaminohydrolase 1 OS=Homo sapiens OX=9606 GN=DDAH1 PE=1 SV=3	5	9
721	P62942	FKBP1A	Peptidyl-prolyl cis-trans isomerase FKBP1A OS=Homo sapiens OX=9606 GN=FKBP1A PE=1 SV=2	5	3
722	P28074	PSMB5	Proteasome subunit beta type-5 OS=Homo sapiens OX=9606 GN=PSMB5 PE=1 SV=3	6	7
723	Q15084	PDIA6	Protein disulfide-isomerase A6 OS=Homo sapiens OX=9606 GN=PDIA6 PE=1 SV=1	8	9
724	P52788	SMS	Spermine synthase OS=Homo sapiens OX=9606 GN=SMS PE=1 SV=2	1	4
725	P31948	STIP1	Stress-induced-phosphoprotein 1 OS=Homo sapiens OX=9606 GN=STIP1 PE=1 SV=1	0	0
726	P04066	FUCA1	Tissue alpha-L-fucosidase OS=Homo sapiens OX=9606 GN=FUCA1 PE=1 SV=4	10	10
727	P13693	TPT1	Translationally-controlled tumor protein OS=Homo sapiens OX=9606 GN=TPT1 PE=1 SV=1	7	8
728	Q9GZM7	TINAGL1	Tubulointerstitial nephritis antigen-like OS=Homo sapiens OX=9606 GN=TINAGL1 PE=1 SV=1	3	1
729	P62987	UBA52	Ubiquitin-60S ribosomal protein L40 OS=Homo sapiens OX=9606 GN=UBA52 PE=1 SV=2	9	5
730	Q12907	LMAN2	Vesicular integral-membrane protein VIP36 OS=Homo sapiens OX=9606 GN=LMAN2 PE=1 SV=1	1	5
731	Q9Y279	VSIG4	V-set and immunoglobulin domain-containing protein 4 OS=Homo sapiens OX=9606 GN=VSIG4 PE=1 SV=1	6	7
732	Q9Y2X9	ZNF281	Zinc finger protein 281 OS=Homo sapiens OX=9606 GN=ZNF281 PE=1 SV=1	9	10
733	P08865	RPSA	40S ribosomal protein SA OS=Homo sapiens OX=9606 GN=RPSA PE=1 SV=4	8	3
734	Q9BWD1	ACAT2	Acetyl-CoA acetyltransferase, cytosolic OS=Homo sapiens OX=9606 GN=ACAT2 PE=1 SV=2	3	5
735	P61160	ACTR2	Actin-related protein 2 OS=Homo sapiens OX=9606 GN=ACTR2 PE=1 SV=1	5	5
736	P00325	ADH1B	All-trans-retinol dehydrogenase [NAD(+)] ADH1B OS=Homo sapiens OX=9606 GN=ADH1B PE=1 SV=2	3	4
737	Q9H4A4	RNPEP	Aminopeptidase B OS=Homo sapiens OX=9606 GN=RNPEP PE=1 SV=2	0	4
738	Q9Y5C1	ANGPTL3	Angiopoietin-related protein 3 OS=Homo sapiens OX=9606 GN=ANGPTL3 PE=1 SV=1	10	7
739	Q9NP58	ABCB6	ATP-binding cassette sub-family B member 6, mitochondrial OS=Homo sapiens OX=9606 GN=ABCB6 PE=1 SV=1	8	8
740	P01040	CSTA	Cystatin-A OS=Homo sapiens OX=9606 GN=CSTA PE=1 SV=1	2	2
741	Q16531	DDB1	DNA damage-binding protein 1 OS=Homo sapiens OX=9606 GN=DDB1 PE=1 SV=1	0	0
742	Q9NZ08	ERAP1	Endoplasmic reticulum aminopeptidase 1 OS=Homo sapiens OX=9606 GN=ERAP1 PE=1 SV=3	5	4
743	P14324	FDPS	Farnesyl pyrophosphate synthase OS=Homo sapiens OX=9606 GN=FDPS PE=1 SV=4	6	7
744	P14314	PRKCSH	Glucosidase 2 subunit beta OS=Homo sapiens OX=9606 GN=PRKCSH PE=1 SV=2	7	7
745	P21266	GSTM3	Glutathione S-transferase Mu 3 OS=Homo sapiens OX=9606 GN=GSTM3 PE=1 SV=3	8	5
746	P10321	HLA-C	HLA class I histocompatibility antigen, C alpha chain OS=Homo sapiens OX=9606 GN=HLA-C PE=1 SV=3	7	5
747	P01854	IGHE	Immunoglobulin heavy constant epsilon OS=Homo sapiens OX=9606 GN=IGHE PE=1 SV=1	5	0
748	Q7RTS7	KRT74	Keratin, type II cytoskeletal 74 OS=Homo sapiens OX=9606 GN=KRT74 PE=1 SV=2	9	4
749	P05164	MPO	Myeloperoxidase OS=Homo sapiens OX=9606 GN=MPO PE=1 SV=1	9	10
750	P29966	MARCKS	Myristoylated alanine-rich C-kinase substrate OS=Homo sapiens OX=9606 GN=MARCKS PE=1 SV=4	9	8
751	O95865	DDAH2	N(G),N(G)-dimethylarginine dimethylaminohydrolase 2 OS=Homo sapiens OX=9606 GN=DDAH2 PE=1 SV=1	0	0
752	Q05901	CHRNB3	Neuronal acetylcholine receptor subunit beta-3 OS=Homo sapiens OX=9606 GN=CHRNB3 PE=2 SV=2	10	10
753	Q9Y266	NUDC	Nuclear migration protein nudC OS=Homo sapiens OX=9606 GN=NUDC PE=1 SV=1	5	1
754	Q00688	FKBP3	Peptidyl-prolyl cis-trans isomerase FKBP3 OS=Homo sapiens OX=9606 GN=FKBP3 PE=1 SV=1	7	6
755	Q8NC51	SERBP1	Plasminogen activator inhibitor 1 RNA-binding protein OS=Homo sapiens OX=9606 GN=SERBP1 PE=1 SV=2	3	2
756	P28070	PSMB4	Proteasome subunit beta type-4 OS=Homo sapiens OX=9606 GN=PSMB4 PE=1 SV=4	9	10
757	P28062	PSMB8	Proteasome subunit beta type-8 OS=Homo sapiens OX=9606 GN=PSMB8 PE=1 SV=3	8	8
758	Q99435	NELL2	Protein kinase C-binding protein NELL2 OS=Homo sapiens OX=9606 GN=NELL2 PE=1 SV=1	3	2
759	P38159	RBMX	RNA-binding motif protein, X chromosome OS=Homo sapiens OX=9606 GN=RBMX PE=1 SV=3	1	3
760	Q8WZ75	ROBO4	Roundabout homolog 4 OS=Homo sapiens OX=9606 GN=ROBO4 PE=1 SV=1	8	8
761	Q01082	SPTBN1	Spectrin beta chain, non-erythrocytic 1 OS=Homo sapiens OX=9606 GN=SPTBN1 PE=1 SV=2	9	10
762	Q8NBS9	TXNDC5	Thioredoxin domain-containing protein 5 OS=Homo sapiens OX=9606 GN=TXNDC5 PE=1 SV=2	3	4
763	P54578	USP14	Ubiquitin carboxyl-terminal hydrolase 14 OS=Homo sapiens OX=9606 GN=USP14 PE=1 SV=3	6	8
764	P68036	UBE2L3	Ubiquitin-conjugating enzyme E2 L3 OS=Homo sapiens OX=9606 GN=UBE2L3 PE=1 SV=1	6	3
765	P67809	YBX1	Y-box-binding protein 1 OS=Homo sapiens OX=9606 GN=YBX1 PE=1 SV=3	2	2
766	P39687	ANP32A	Acidic leucine-rich nuclear phosphoprotein 32 family member A OS=Homo sapiens OX=9606 GN=ANP32A PE=1 SV=1	5	7
767	Q92688	ANP32B	Acidic leucine-rich nuclear phosphoprotein 32 family member B OS=Homo sapiens OX=9606 GN=ANP32B PE=1 SV=1	9	10
768	Q9NZK5	ADA2	Adenosine deaminase 2 OS=Homo sapiens OX=9606 GN=ADA2 PE=1 SV=2	2	5
769	P35609	ACTN2	Alpha-actinin-2 OS=Homo sapiens OX=9606 GN=ACTN2 PE=1 SV=1	8	9
770	P15291	B4GALT1	Beta-1,4-galactosyltransferase 1 OS=Homo sapiens OX=9606 GN=B4GALT1 PE=1 SV=5	2	2
771	P31939	ATIC	Bifunctional purine biosynthesis protein PURH OS=Homo sapiens OX=9606 GN=ATIC PE=1 SV=3	3	3
772	Q96SI1	KCTD15	BTB/POZ domain-containing protein KCTD15 OS=Homo sapiens OX=9606 GN=KCTD15 PE=1 SV=1	4	7
773	P31323	PRKAR2B	cAMP-dependent protein kinase type II-beta regulatory subunit OS=Homo sapiens OX=9606 GN=PRKAR2B PE=1 SV=3	9	9
774	Q8IUL8	CILP2	Cartilage intermediate layer protein 2 OS=Homo sapiens OX=9606 GN=CILP2 PE=2 SV=2	5	8
775	P05997	COL5A2	Collagen alpha-2(V) chain OS=Homo sapiens OX=9606 GN=COL5A2 PE=1 SV=3	10	10
776	Q9NPY3	CD93	Complement component C1q receptor OS=Homo sapiens OX=9606 GN=CD93 PE=1 SV=3	7	8
777	P60981	DSTN	Destrin OS=Homo sapiens OX=9606 GN=DSTN PE=1 SV=3	4	5
778	P09417	QDPR	Dihydropteridine reductase OS=Homo sapiens OX=9606 GN=QDPR PE=1 SV=2	5	6
779	Q8N7E2	ZNF645	E3 ubiquitin-protein ligase CBLL2 OS=Homo sapiens OX=9606 GN=CBLL2 PE=1 SV=1	10	10
780	Q16394	EXT1	Exostosin-1 OS=Homo sapiens OX=9606 GN=EXT1 PE=1 SV=2	3	3
781	Q93063	EXT2	Exostosin-2 OS=Homo sapiens OX=9606 GN=EXT2 PE=1 SV=1	9	10
782	P20930	FLG	Filaggrin OS=Homo sapiens OX=9606 GN=FLG PE=1 SV=3	7	9
783	P46926	GNPDA1	Glucosamine-6-phosphate isomerase 1 OS=Homo sapiens OX=9606 GN=GNPDA1 PE=1 SV=1	10	8
784	O60243	HS6ST1	Heparan-sulfate 6-O-sulfotransferase 1 OS=Homo sapiens OX=9606 GN=HS6ST1 PE=1 SV=5	10	6
785	Q09028	RBBP4	Histone-binding protein RBBP4 OS=Homo sapiens OX=9606 GN=RBBP4 PE=1 SV=3	5	6
786	Q9Y5F6-2	PCDHGC5	Isoform 2 of Protocadherin gamma-C5 OS=Homo sapiens OX=9606 GN=PCDHGC5	10	10
787	Q6VAB6	KSR2	Kinase suppressor of Ras 2 OS=Homo sapiens OX=9606 GN=KSR2 PE=1 SV=2	10	10
788	Q2KJY2	KIF26B	Kinesin-like protein KIF26B OS=Homo sapiens OX=9606 GN=KIF26B PE=1 SV=1	10	10
789	P01130	LDLR	Low-density lipoprotein receptor OS=Homo sapiens OX=9606 GN=LDLR PE=1 SV=1	1	4
790	P16035	TIMP2	Metalloproteinase inhibitor 2 OS=Homo sapiens OX=9606 GN=TIMP2 PE=1 SV=2	7	6
791	Q9H8L6	MMRN2	Multimerin-2 OS=Homo sapiens OX=9606 GN=MMRN2 PE=1 SV=2	9	8
792	Q9NY97	B3GNT2	N-acetyllactosaminide beta-1,3-N-acetylglucosaminyltransferase 2 OS=Homo sapiens OX=9606 GN=B3GNT2 PE=1 SV=2	6	8
793	Q9UNZ2	NSFL1C	NSFL1 cofactor p47 OS=Homo sapiens OX=9606 GN=NSFL1C PE=1 SV=2	1	0
794	P30044	PRDX5	Peroxiredoxin-5, mitochondrial OS=Homo sapiens OX=9606 GN=PRDX5 PE=1 SV=4	10	10
795	P25787	PSMA2	Proteasome subunit alpha type-2 OS=Homo sapiens OX=9606 GN=PSMA2 PE=1 SV=2	5	8
796	P49720	PSMB3	Proteasome subunit beta type-3 OS=Homo sapiens OX=9606 GN=PSMB3 PE=1 SV=2	8	5
797	P28072	PSMB6	Proteasome subunit beta type-6 OS=Homo sapiens OX=9606 GN=PSMB6 PE=1 SV=4	1	0
798	P31151	S100A7	Protein S100-A7 OS=Homo sapiens OX=9606 GN=S100A7 PE=1 SV=4	8	9
799	Q13332	PTPRS	Receptor-type tyrosine-protein phosphatase S OS=Homo sapiens OX=9606 GN=PTPRS PE=1 SV=3	0	0
800	P61956	SUMO2	Small ubiquitin-related modifier 2 OS=Homo sapiens OX=9606 GN=SUMO2 PE=1 SV=3	10	9
801	P04179	SOD2	Superoxide dismutase [Mn], mitochondrial OS=Homo sapiens OX=9606 GN=SOD2 PE=1 SV=3	0	1
802	P31431	SDC4	Syndecan-4 OS=Homo sapiens OX=9606 GN=SDC4 PE=1 SV=2	6	3
803	Q9P0L0	VAPA	Vesicle-associated membrane protein-associated protein A OS=Homo sapiens OX=9606 GN=VAPA PE=1 SV=3	5	5
804	Q96DA0	ZG16B	Zymogen granule protein 16 homolog B OS=Homo sapiens OX=9606 GN=ZG16B PE=1 SV=3	6	5
805	P59998	ARPC4	Actin-related protein 2/3 complex subunit 4 OS=Homo sapiens OX=9606 GN=ARPC4 PE=1 SV=3	3	2
806	P00568	AK1	Adenylate kinase isoenzyme 1 OS=Homo sapiens OX=9606 GN=AK1 PE=1 SV=3	5	5
807	Q9UKK9	NUDT5	ADP-sugar pyrophosphatase OS=Homo sapiens OX=9606 GN=NUDT5 PE=1 SV=1	0	0
808	Q9UBR2	CTSZ	Cathepsin Z OS=Homo sapiens OX=9606 GN=CTSZ PE=1 SV=1	7	9
809	Q05707	COL14A1	Collagen alpha-1(XIV) chain OS=Homo sapiens OX=9606 GN=COL14A1 PE=1 SV=3	4	3
810	P99999	CYCS	Cytochrome c OS=Homo sapiens OX=9606 GN=CYCS PE=1 SV=2	3	2
811	P30046	DDT	D-dopachrome decarboxylase OS=Homo sapiens OX=9606 GN=DDT PE=1 SV=3	4	1
812	Q2NKX8	ERCC6L	DNA excision repair protein ERCC-6-like OS=Homo sapiens OX=9606 GN=ERCC6L PE=1 SV=1	10	10
813	O75223	GGCT	Gamma-glutamylcyclotransferase OS=Homo sapiens OX=9606 GN=GGCT PE=1 SV=1	6	7
814	P28161	GSTM2	Glutathione S-transferase Mu 2 OS=Homo sapiens OX=9606 GN=GSTM2 PE=1 SV=2	7	7
815	Q6UWH4	FAM198B	Golgi-associated kinase 1B OS=Homo sapiens OX=9606 GN=GASK1B PE=2 SV=1	2	7
816	P09429	HMGB1	High mobility group protein B1 OS=Homo sapiens OX=9606 GN=HMGB1 PE=1 SV=3	4	4
817	P24592	IGFBP6	Insulin-like growth factor-binding protein 6 OS=Homo sapiens OX=9606 GN=IGFBP6 PE=1 SV=1	5	9
818	Q9H7C9	AAMDC	Mth938 domain-containing protein OS=Homo sapiens OX=9606 GN=AAMDC PE=1 SV=1	7	7
819	P35749	MYH11	Myosin-11 OS=Homo sapiens OX=9606 GN=MYH11 PE=1 SV=3	3	3
820	Q8NCW5	APOA1BP	NAD(P)H-hydrate epimerase OS=Homo sapiens OX=9606 GN=NAXE PE=1 SV=2	1	1
821	Q14980	NUMA1	Nuclear mitotic apparatus protein 1 OS=Homo sapiens OX=9606 GN=NUMA1 PE=1 SV=2	8	7
822	Q13772	NCOA4	Nuclear receptor coactivator 4 OS=Homo sapiens OX=9606 GN=NCOA4 PE=1 SV=1	8	8
823	Q9H1E3	NUCKS1	Nuclear ubiquitous casein and cyclin-dependent kinase substrate 1 OS=Homo sapiens OX=9606 GN=NUCKS1 PE=1 SV=1	3	2
824	Q99983	OMD	Osteomodulin OS=Homo sapiens OX=9606 GN=OMD PE=1 SV=1	3	3
825	Q96S96	PEBP4	Phosphatidylethanolamine-binding protein 4 OS=Homo sapiens OX=9606 GN=PEBP4 PE=1 SV=3	7	7
826	P01833	PIGR	Polymeric immunoglobulin receptor OS=Homo sapiens OX=9606 GN=PIGR PE=1 SV=4	6	6
827	Q10471	GALNT2	Polypeptide N-acetylgalactosaminyltransferase 2 OS=Homo sapiens OX=9606 GN=GALNT2 PE=1 SV=1	3	7
828	Q92520	FAM3C	Protein FAM3C OS=Homo sapiens OX=9606 GN=FAM3C PE=1 SV=1	5	6
829	P61326	MAGOH	Protein mago nashi homolog OS=Homo sapiens OX=9606 GN=MAGOH PE=1 SV=1	7	4
830	A6NMY6	ANXA2P2	Putative annexin A2-like protein OS=Homo sapiens OX=9606 GN=ANXA2P2 PE=5 SV=2	1	1
831	Q15293	RCN1	Reticulocalbin-1 OS=Homo sapiens OX=9606 GN=RCN1 PE=1 SV=1	2	1
832	P35637	FUS	RNA-binding protein FUS OS=Homo sapiens OX=9606 GN=FUS PE=1 SV=1	5	4
833	Q9NVA2	SEPTIN11	Septin-11 OS=Homo sapiens OX=9606 GN=SEPTIN11 PE=1 SV=3	5	1
834	P35237	SERPINB6	Serpin B6 OS=Homo sapiens OX=9606 GN=SERPINB6 PE=1 SV=3	0	0
835	O75368	SH3BGRL	SH3 domain-binding glutamic acid-rich-like protein OS=Homo sapiens OX=9606 GN=SH3BGRL PE=1 SV=1	10	10
836	Q9BRA2	TXNDC17	Thioredoxin domain-containing protein 17 OS=Homo sapiens OX=9606 GN=TXNDC17 PE=1 SV=1	6	6
837	Q16881	TXNRD1	Thioredoxin reductase 1, cytoplasmic OS=Homo sapiens OX=9606 GN=TXNRD1 PE=1 SV=3	0	7
838	O43396	TXNL1	Thioredoxin-like protein 1 OS=Homo sapiens OX=9606 GN=TXNL1 PE=1 SV=3	6	4
839	O43493	TGOLN2	Trans-Golgi network integral membrane protein 2 OS=Homo sapiens OX=9606 GN=TGOLN2 PE=1 SV=4	0	0
840	Q96FW1	OTUB1	Ubiquitin thioesterase OTUB1 OS=Homo sapiens OX=9606 GN=OTUB1 PE=1 SV=2	4	2
841	P61604	HSPE1	10 kDa heat shock protein, mitochondrial OS=Homo sapiens OX=9606 GN=HSPE1 PE=1 SV=2	5	3
842	P62280	RPS11	40S ribosomal protein S11 OS=Homo sapiens OX=9606 GN=RPS11 PE=1 SV=3	0	1
843	P62269	RPS18	40S ribosomal protein S18 OS=Homo sapiens OX=9606 GN=RPS18 PE=1 SV=3	8	9
844	O15143	ARPC1B	Actin-related protein 2/3 complex subunit 1B OS=Homo sapiens OX=9606 GN=ARPC1B PE=1 SV=3	3	3
845	P61158	ACTR3	Actin-related protein 3 OS=Homo sapiens OX=9606 GN=ACTR3 PE=1 SV=3	8	8
846	P07108	DBI	Acyl-CoA-binding protein OS=Homo sapiens OX=9606 GN=DBI PE=1 SV=2	6	5
847	P61204	ARF3	ADP-ribosylation factor 3 OS=Homo sapiens OX=9606 GN=ARF3 PE=1 SV=2	1	0
848	P14550	AKR1A1	Aldo-keto reductase family 1 member A1 OS=Homo sapiens OX=9606 GN=AKR1A1 PE=1 SV=3	4	4
849	P06576	ATP5B	ATP synthase subunit beta, mitochondrial OS=Homo sapiens OX=9606 GN=ATP5F1B PE=1 SV=3	10	6
850	O43505	B4GAT1	Beta-1,4-glucuronyltransferase 1 OS=Homo sapiens OX=9606 GN=B4GAT1 PE=1 SV=1	4	4
851	P12645	BMP3	Bone morphogenetic protein 3 OS=Homo sapiens OX=9606 GN=BMP3 PE=1 SV=2	3	3
852	Q14019	COTL1	Coactosin-like protein OS=Homo sapiens OX=9606 GN=COTL1 PE=1 SV=3	9	8
853	Q9Y6Z7	COLEC10	Collectin-10 OS=Homo sapiens OX=9606 GN=COLEC10 PE=1 SV=2	10	10
854	Q86VP6	CAND1	Cullin-associated NEDD8-dissociated protein 1 OS=Homo sapiens OX=9606 GN=CAND1 PE=1 SV=2	5	1
855	Q9UBS4	DNAJB11	DnaJ homolog subfamily B member 11 OS=Homo sapiens OX=9606 GN=DNAJB11 PE=1 SV=1	10	10
856	Q5XPI4	RNF123	E3 ubiquitin-protein ligase RNF123 OS=Homo sapiens OX=9606 GN=RNF123 PE=1 SV=1	10	10
857	P98172	EFNB1	Ephrin-B1 OS=Homo sapiens OX=9606 GN=EFNB1 PE=1 SV=1	0	0
858	P00533	EGFR	Epidermal growth factor receptor OS=Homo sapiens OX=9606 GN=EGFR PE=1 SV=2	2	6
859	P14061	HSD17B1	Estradiol 17-beta-dehydrogenase 1 OS=Homo sapiens OX=9606 GN=HSD17B1 PE=1 SV=3	8	6
860	P52907	CAPZA1	F-actin-capping protein subunit alpha-1 OS=Homo sapiens OX=9606 GN=CAPZA1 PE=1 SV=3	2	2
861	O14792	HS3ST1	Heparan sulfate glucosamine 3-O-sulfotransferase 1 OS=Homo sapiens OX=9606 GN=HS3ST1 PE=1 SV=1	8	8
862	P07305	H1F0	Histone H1.0 OS=Homo sapiens OX=9606 GN=H1-0 PE=1 SV=3	7	7
863	Q96CN7	ISOC1	Isochorismatase domain-containing protein 1 OS=Homo sapiens OX=9606 GN=ISOC1 PE=1 SV=3	7	7
864	Q04760	GLO1	Lactoylglutathione lyase OS=Homo sapiens OX=9606 GN=GLO1 PE=1 SV=4	1	0
865	P42167	TMPO	Lamina-associated polypeptide 2, isoforms beta/gamma OS=Homo sapiens OX=9606 GN=TMPO PE=1 SV=2	1	1
866	Q96JA1	LRIG1	Leucine-rich repeats and immunoglobulin-like domains protein 1 OS=Homo sapiens OX=9606 GN=LRIG1 PE=1 SV=2	6	9
867	P30740	SERPINB1	Leukocyte elastase inhibitor OS=Homo sapiens OX=9606 GN=SERPINB1 PE=1 SV=1	3	4
868	P05451	REG1A	Lithostathine-1-alpha OS=Homo sapiens OX=9606 GN=REG1A PE=1 SV=3	7	5
869	P22897	MRC1	Macrophage mannose receptor 1 OS=Homo sapiens OX=9606 GN=MRC1 PE=1 SV=1	5	4
870	Q15691	MAPRE1	Microtubule-associated protein RP/EB family member 1 OS=Homo sapiens OX=9606 GN=MAPRE1 PE=1 SV=3	0	0
871	Q7Z388	DPY19L4	Probable C-mannosyltransferase DPY19L4 OS=Homo sapiens OX=9606 GN=DPY19L4 PE=1 SV=1	10	10
872	P28066	PSMA5	Proteasome subunit alpha type-5 OS=Homo sapiens OX=9606 GN=PSMA5 PE=1 SV=3	2	2
873	Q9P258	RCC2	Protein RCC2 OS=Homo sapiens OX=9606 GN=RCC2 PE=1 SV=2	6	8
874	Q99584	S100A13	Protein S100-A13 OS=Homo sapiens OX=9606 GN=S100A13 PE=1 SV=1	3	0
875	Q9NPR2	SEMA4B	Semaphorin-4B OS=Homo sapiens OX=9606 GN=SEMA4B PE=1 SV=4	9	10
876	Q9UBE0	SAE1	SUMO-activating enzyme subunit 1 OS=Homo sapiens OX=9606 GN=SAE1 PE=1 SV=1	5	7
877	Q15631	TSN	Translin OS=Homo sapiens OX=9606 GN=TSN PE=1 SV=1	4	1
878	Q7Z4G4	TRMT11	tRNA (guanine(10)-N2)-methyltransferase homolog OS=Homo sapiens OX=9606 GN=TRMT11 PE=1 SV=1	10	10
879	P54727	RAD23B	UV excision repair protein RAD23 homolog B OS=Homo sapiens OX=9606 GN=RAD23B PE=1 SV=1	2	1
880	P61247	RPS3A	40S ribosomal protein S3a OS=Homo sapiens OX=9606 GN=RPS3A PE=1 SV=2	6	5
881	P05386	RPLP1	60S acidic ribosomal protein P1 OS=Homo sapiens OX=9606 GN=RPLP1 PE=1 SV=1	3	3
882	O15145	ARPC3	Actin-related protein 2/3 complex subunit 3 OS=Homo sapiens OX=9606 GN=ARPC3 PE=1 SV=3	7	6
883	Q16586	SGCA	Alpha-sarcoglycan OS=Homo sapiens OX=9606 GN=SGCA PE=1 SV=1	10	10
884	Q03154	ACY1	Aminoacylase-1 OS=Homo sapiens OX=9606 GN=ACY1 PE=1 SV=1	4	3
885	P00505	GOT2	Aspartate aminotransferase, mitochondrial OS=Homo sapiens OX=9606 GN=GOT2 PE=1 SV=3	5	6
886	Q8NFC6	BOD1L1	Biorientation of chromosomes in cell division protein 1-like 1 OS=Homo sapiens OX=9606 GN=BOD1L1 PE=1 SV=2	7	8
887	Q13867	BLMH	Bleomycin hydrolase OS=Homo sapiens OX=9606 GN=BLMH PE=1 SV=1	6	10
888	Q13185	CBX3	Chromobox protein homolog 3 OS=Homo sapiens OX=9606 GN=CBX3 PE=1 SV=4	1	3
889	Q02487	DSC2	Desmocollin-2 OS=Homo sapiens OX=9606 GN=DSC2 PE=1 SV=1	5	8
890	P09622	DLD	Dihydrolipoyl dehydrogenase, mitochondrial OS=Homo sapiens OX=9606 GN=DLD PE=1 SV=2	0	1
891	P24534	EEF1B2	Elongation factor 1-beta OS=Homo sapiens OX=9606 GN=EEF1B2 PE=1 SV=3	8	9
892	P29692	EEF1D	Elongation factor 1-delta OS=Homo sapiens OX=9606 GN=EEF1D PE=1 SV=5	6	5
893	O75821	EIF3G	Eukaryotic translation initiation factor 3 subunit G OS=Homo sapiens OX=9606 GN=EIF3G PE=1 SV=2	5	5
894	Q8IXL6	FAM20C	Extracellular serine/threonine protein kinase FAM20C OS=Homo sapiens OX=9606 GN=FAM20C PE=1 SV=2	7	8
895	P47756	CAPZB	F-actin-capping protein subunit beta OS=Homo sapiens OX=9606 GN=CAPZB PE=1 SV=4	7	5
896	Q9UBX5	FBLN5	Fibulin-5 OS=Homo sapiens OX=9606 GN=FBLN5 PE=1 SV=1	6	6
897	Q07075	ENPEP	Glutamyl aminopeptidase OS=Homo sapiens OX=9606 GN=ENPEP PE=1 SV=3	10	10
898	Q9Y5Z4	HEBP2	Heme-binding protein 2 OS=Homo sapiens OX=9606 GN=HEBP2 PE=1 SV=1	10	9
899	P08476	INHBA	Inhibin beta A chain OS=Homo sapiens OX=9606 GN=INHBA PE=1 SV=2	1	0
900	P05556	ITGB1	Integrin beta-1 OS=Homo sapiens OX=9606 GN=ITGB1 PE=1 SV=2	6	4
901	Q5JXM2	METTL24	Methyltransferase-like protein 24 OS=Homo sapiens OX=9606 GN=METTL24 PE=2 SV=1	10	8
902	P28482	MAPK1	Mitogen-activated protein kinase 1 OS=Homo sapiens OX=9606 GN=MAPK1 PE=1 SV=3	1	0
903	O15394	NCAM2	Neural cell adhesion molecule 2 OS=Homo sapiens OX=9606 GN=NCAM2 PE=1 SV=2	4	4
904	P61916	NPC2	NPC intracellular cholesterol transporter 2 OS=Homo sapiens OX=9606 GN=NPC2 PE=1 SV=1	8	10
905	Q6IE36	OVOS2	Ovostatin homolog 2 OS=Homo sapiens OX=9606 GN=OVOS2 PE=2 SV=2	4	3
906	P26599	PTBP1	Polypyrimidine tract-binding protein 1 OS=Homo sapiens OX=9606 GN=PTBP1 PE=1 SV=1	2	3
907	P28799	GRN	Progranulin OS=Homo sapiens OX=9606 GN=GRN PE=1 SV=2	5	2
908	P07602	PSAP	Prosaposin OS=Homo sapiens OX=9606 GN=PSAP PE=1 SV=2	6	3
909	P25789	PSMA4	Proteasome subunit alpha type-4 OS=Homo sapiens OX=9606 GN=PSMA4 PE=1 SV=1	6	8
910	Q8WZA0	LZIC	Protein LZIC OS=Homo sapiens OX=9606 GN=LZIC PE=1 SV=1	3	6
911	Q8IVE0	CROCCP3	Putative ciliary rootlet coiled-coil protein-like 2 protein OS=Homo sapiens OX=9606 GN=CROCCP3 PE=5 SV=1	10	9
912	Q53FA7	TP53I3	Quinone oxidoreductase PIG3 OS=Homo sapiens OX=9606 GN=TP53I3 PE=1 SV=2	0	1
913	P63244	GNB2L1	Receptor of activated protein C kinase 1 OS=Homo sapiens OX=9606 GN=RACK1 PE=1 SV=3	5	5
914	Q07960	ARHGAP1	Rho GTPase-activating protein 1 OS=Homo sapiens OX=9606 GN=ARHGAP1 PE=1 SV=1	3	3
915	P13489	RNH1	Ribonuclease inhibitor OS=Homo sapiens OX=9606 GN=RNH1 PE=1 SV=2	2	1
916	Q59EK9	RUNDC3A	RUN domain-containing protein 3A OS=Homo sapiens OX=9606 GN=RUNDC3A PE=1 SV=2	10	10
917	Q15019	SEPTIN2	Septin-2 OS=Homo sapiens OX=9606 GN=SEPTIN2 PE=1 SV=1	7	7
918	Q16181	SEPTIN7	Septin-7 OS=Homo sapiens OX=9606 GN=SEPTIN7 PE=1 SV=2	6	5
919	Q07955	SRSF1	Serine/arginine-rich splicing factor 1 OS=Homo sapiens OX=9606 GN=SRSF1 PE=1 SV=2	5	9
920	Q9Y3F4	STRAP	Serine-threonine kinase receptor-associated protein OS=Homo sapiens OX=9606 GN=STRAP PE=1 SV=1	8	9
921	P50454	SERPINH1	Serpin H1 OS=Homo sapiens OX=9606 GN=SERPINH1 PE=1 SV=2	2	3
922	Q99536	VAT1	Synaptic vesicle membrane protein VAT-1 homolog OS=Homo sapiens OX=9606 GN=VAT1 PE=1 SV=2	1	1
923	Q9Y490	TLN1	Talin-1 OS=Homo sapiens OX=9606 GN=TLN1 PE=1 SV=3	4	3
924	P50990	CCT8	T-complex protein 1 subunit theta OS=Homo sapiens OX=9606 GN=CCT8 PE=1 SV=4	4	7
925	Q14956	GPNMB	Transmembrane glycoprotein NMB OS=Homo sapiens OX=9606 GN=GPNMB PE=1 SV=2	7	6
926	P30530	AXL	Tyrosine-protein kinase receptor UFO OS=Homo sapiens OX=9606 GN=AXL PE=1 SV=4	0	1
927	P30085	CMPK1	UMP-CMP kinase OS=Homo sapiens OX=9606 GN=CMPK1 PE=1 SV=3	1	1
928	Q9NRX4	PHPT1	14 kDa phosphohistidine phosphatase OS=Homo sapiens OX=9606 GN=PHPT1 PE=1 SV=1	0	0
929	P42765	ACAA2	3-ketoacyl-CoA thiolase, mitochondrial OS=Homo sapiens OX=9606 GN=ACAA2 PE=1 SV=2	1	0
930	P62249	RPS16	40S ribosomal protein S16 OS=Homo sapiens OX=9606 GN=RPS16 PE=1 SV=2	4	4
931	P62906	RPL10A	60S ribosomal protein L10a OS=Homo sapiens OX=9606 GN=RPL10A PE=1 SV=2	3	1
932	Q07020	RPL18	60S ribosomal protein L18 OS=Homo sapiens OX=9606 GN=RPL18 PE=1 SV=2	5	6
933	P36578	RPL4	60S ribosomal protein L4 OS=Homo sapiens OX=9606 GN=RPL4 PE=1 SV=5	4	3
934	O95336	PGLS	6-phosphogluconolactonase OS=Homo sapiens OX=9606 GN=PGLS PE=1 SV=2	0	0
935	Q13085	ACACA	Acetyl-CoA carboxylase 1 OS=Homo sapiens OX=9606 GN=ACACA PE=1 SV=2	10	9
936	Q92747	ARPC1A	Actin-related protein 2/3 complex subunit 1A OS=Homo sapiens OX=9606 GN=ARPC1A PE=2 SV=2	1	0
937	P07741	APRT	Adenine phosphoribosyltransferase OS=Homo sapiens OX=9606 GN=APRT PE=1 SV=2	2	3
938	P18085	ARF4	ADP-ribosylation factor 4 OS=Homo sapiens OX=9606 GN=ARF4 PE=1 SV=3	2	0
939	P07686	HEXB	Beta-hexosaminidase subunit beta OS=Homo sapiens OX=9606 GN=HEXB PE=1 SV=3	6	7
940	P80723	BASP1	Brain acid soluble protein 1 OS=Homo sapiens OX=9606 GN=BASP1 PE=1 SV=2	7	2
941	Q9HBB8	CDHR5	Cadherin-related family member 5 OS=Homo sapiens OX=9606 GN=CDHR5 PE=1 SV=3	6	3
942	P14209	CD99	CD99 antigen OS=Homo sapiens OX=9606 GN=CD99 PE=1 SV=1	10	9
943	Q9Y696	CLIC4	Chloride intracellular channel protein 4 OS=Homo sapiens OX=9606 GN=CLIC4 PE=1 SV=4	4	4
944	Q9BXJ4	C1QTNF3	Complement C1q tumor necrosis factor-related protein 3 OS=Homo sapiens OX=9606 GN=C1QTNF3 PE=1 SV=1	2	2
945	Q9NWV4	C1orf123	CXXC motif containing zinc binding protein OS=Homo sapiens OX=9606 GN=CZIB PE=1 SV=1	2	7
946	Q13409	DYNC1I2	Cytoplasmic dynein 1 intermediate chain 2 OS=Homo sapiens OX=9606 GN=DYNC1I2 PE=1 SV=3	0	2
947	Q08554	DSC1	Desmocollin-1 OS=Homo sapiens OX=9606 GN=DSC1 PE=1 SV=2	0	0
948	Q96C19	EFHD2	EF-hand domain-containing protein D2 OS=Homo sapiens OX=9606 GN=EFHD2 PE=1 SV=1	2	3
949	P11413	G6PD	Glucose-6-phosphate 1-dehydrogenase OS=Homo sapiens OX=9606 GN=G6PD PE=1 SV=4	3	2
950	Q9H4G4	GLIPR2	Golgi-associated plant pathogenesis-related protein 1 OS=Homo sapiens OX=9606 GN=GLIPR2 PE=1 SV=3	9	10
951	Q14393	GAS6	Growth arrest-specific protein 6 OS=Homo sapiens OX=9606 GN=GAS6 PE=1 SV=3	3	1
952	O60506	SYNCRIP	Heterogeneous nuclear ribonucleoprotein Q OS=Homo sapiens OX=9606 GN=SYNCRIP PE=1 SV=2	0	0
953	O43390	HNRNPR	Heterogeneous nuclear ribonucleoprotein R OS=Homo sapiens OX=9606 GN=HNRNPR PE=1 SV=1	0	0
954	P10915	HAPLN1	Hyaluronan and proteoglycan link protein 1 OS=Homo sapiens OX=9606 GN=HAPLN1 PE=2 SV=2	2	3
955	A0A0B4J1U3	IGLV1-36	Immunoglobulin lambda variable 1-36 OS=Homo sapiens OX=9606 GN=IGLV1-36 PE=1 SV=5	2	8
956	Q13642-1	FHL1	Isoform 1 of Four and a half LIM domains protein 1 OS=Homo sapiens OX=9606 GN=FHL1	2	4
957	Q03252	LMNB2	Lamin-B2 OS=Homo sapiens OX=9606 GN=LMNB2 PE=1 SV=4	2	1
958	P48304	REG1B	Lithostathine-1-beta OS=Homo sapiens OX=9606 GN=REG1B PE=1 SV=1	4	4
959	Q9Y4K0	LOXL2	Lysyl oxidase homolog 2 OS=Homo sapiens OX=9606 GN=LOXL2 PE=1 SV=1	3	1
960	P49006	MARCKSL1	MARCKS-related protein OS=Homo sapiens OX=9606 GN=MARCKSL1 PE=1 SV=2	2	3
961	Q13765	NACA	Nascent polypeptide-associated complex subunit alpha OS=Homo sapiens OX=9606 GN=NACA PE=1 SV=1	0	0
962	P41271	NBL1	Neuroblastoma suppressor of tumorigenicity 1 OS=Homo sapiens OX=9606 GN=NBL1 PE=1 SV=2	5	6
963	P05114	HMGN1	Non-histone chromosomal protein HMG-14 OS=Homo sapiens OX=9606 GN=HMGN1 PE=1 SV=3	1	1
964	P23497	SP100	Nuclear autoantigen Sp-100 OS=Homo sapiens OX=9606 GN=SP100 PE=1 SV=3	1	6
965	Q9NW61	PLEKHJ1	Pleckstrin homology domain-containing family J member 1 OS=Homo sapiens OX=9606 GN=PLEKHJ1 PE=1 SV=1	10	10
966	Q15366	PCBP2	Poly(rC)-binding protein 2 OS=Homo sapiens OX=9606 GN=PCBP2 PE=1 SV=1	1	0
967	O14737	PDCD5	Programmed cell death protein 5 OS=Homo sapiens OX=9606 GN=PDCD5 PE=1 SV=3	4	7
968	P12004	PCNA	Proliferating cell nuclear antigen OS=Homo sapiens OX=9606 GN=PCNA PE=1 SV=1	6	6
969	Q9UQ80	PA2G4	Proliferation-associated protein 2G4 OS=Homo sapiens OX=9606 GN=PA2G4 PE=1 SV=3	3	4
970	Q07954	LRP1	Prolow-density lipoprotein receptor-related protein 1 OS=Homo sapiens OX=9606 GN=LRP1 PE=1 SV=2	0	0
971	Q14914	PTGR1	Prostaglandin reductase 1 OS=Homo sapiens OX=9606 GN=PTGR1 PE=1 SV=2	5	1
972	Q9ULI3	HEG1	Protein HEG homolog 1 OS=Homo sapiens OX=9606 GN=HEG1 PE=1 SV=3	5	3
973	P06703	S100A6	Protein S100-A6 OS=Homo sapiens OX=9606 GN=S100A6 PE=1 SV=1	1	2
974	Q9NPG4	PCDH12	Protocadherin-12 OS=Homo sapiens OX=9606 GN=PCDH12 PE=1 SV=1	7	5
975	P43487	RANBP1	Ran-specific GTPase-activating protein OS=Homo sapiens OX=9606 GN=RANBP1 PE=1 SV=1	8	7
976	P31153	MAT2A	S-adenosylmethionine synthase isoform type-2 OS=Homo sapiens OX=9606 GN=MAT2A PE=1 SV=1	7	2
977	Q6FHJ7	SFRP4	Secreted frizzled-related protein 4 OS=Homo sapiens OX=9606 GN=SFRP4 PE=1 SV=2	4	2
978	P02549	SPTA1	Spectrin alpha chain, erythrocytic 1 OS=Homo sapiens OX=9606 GN=SPTA1 PE=1 SV=5	10	10
979	Q9UBT2	UBA2	SUMO-activating enzyme subunit 2 OS=Homo sapiens OX=9606 GN=UBA2 PE=1 SV=2	3	4
980	P40227	CCT6A	T-complex protein 1 subunit zeta OS=Homo sapiens OX=9606 GN=CCT6A PE=1 SV=3	1	0
981	P30048	PRDX3	Thioredoxin-dependent peroxide reductase, mitochondrial OS=Homo sapiens OX=9606 GN=PRDX3 PE=1 SV=3	1	1
982	Q99426	TBCB	Tubulin-folding cofactor B OS=Homo sapiens OX=9606 GN=TBCB PE=1 SV=2	5	8
983	P35590	TIE1	Tyrosine-protein kinase receptor Tie-1 OS=Homo sapiens OX=9606 GN=TIE1 PE=1 SV=1	4	3
984	P61088	UBE2N	Ubiquitin-conjugating enzyme E2 N OS=Homo sapiens OX=9606 GN=UBE2N PE=1 SV=1	4	6
985	Q13404	UBE2V1	Ubiquitin-conjugating enzyme E2 variant 1 OS=Homo sapiens OX=9606 GN=UBE2V1 PE=1 SV=2	2	1
986	P62857	RPS28	40S ribosomal protein S28 OS=Homo sapiens OX=9606 GN=RPS28 PE=1 SV=1	9	5
987	P46781	RPS9	40S ribosomal protein S9 OS=Homo sapiens OX=9606 GN=RPS9 PE=1 SV=3	7	9
988	P35268	RPL22	60S ribosomal protein L22 OS=Homo sapiens OX=9606 GN=RPL22 PE=1 SV=2	4	4
989	Q92484	SMPDL3A	Acid sphingomyelinase-like phosphodiesterase 3a OS=Homo sapiens OX=9606 GN=SMPDL3A PE=1 SV=2	1	0
990	P53999	SUB1	Activated RNA polymerase II transcriptional coactivator p15 OS=Homo sapiens OX=9606 GN=SUB1 PE=1 SV=3	4	0
991	P54819	AK2	Adenylate kinase 2, mitochondrial OS=Homo sapiens OX=9606 GN=AK2 PE=1 SV=2	7	4
992	O00462	MANBA	Beta-mannosidase OS=Homo sapiens OX=9606 GN=MANBA PE=1 SV=3	8	3
993	P53004	BLVRA	Biliverdin reductase A OS=Homo sapiens OX=9606 GN=BLVRA PE=1 SV=2	5	3
994	Q96CX2	KCTD12	BTB/POZ domain-containing protein KCTD12 OS=Homo sapiens OX=9606 GN=KCTD12 PE=1 SV=1	1	0
995	Q86UP0	CDH24	Cadherin-24 OS=Homo sapiens OX=9606 GN=CDH24 PE=1 SV=1	7	10
996	P22223	CDH3	Cadherin-3 OS=Homo sapiens OX=9606 GN=CDH3 PE=1 SV=2	7	5
997	O43852	CALU	Calumenin OS=Homo sapiens OX=9606 GN=CALU PE=1 SV=2	3	1
998	P25774	CTSS	Cathepsin S OS=Homo sapiens OX=9606 GN=CTSS PE=1 SV=3	1	0
999	Q16627	CCL14	C-C motif chemokine 14 OS=Homo sapiens OX=9606 GN=CCL14 PE=1 SV=1	8	4
1000	P23435	CBLN1	Cerebellin-1 OS=Homo sapiens OX=9606 GN=CBLN1 PE=1 SV=1	3	2
1001	Q01955	COL4A3	Collagen alpha-3(IV) chain OS=Homo sapiens OX=9606 GN=COL4A3 PE=1 SV=3	4	4
1002	Q9ULV4	CORO1C	Coronin-1C OS=Homo sapiens OX=9606 GN=CORO1C PE=1 SV=1	1	0
1003	P81605	DCD	Dermcidin OS=Homo sapiens OX=9606 GN=DCD PE=1 SV=2	3	2
1004	Q9H4A9	DPEP2	Dipeptidase 2 OS=Homo sapiens OX=9606 GN=DPEP2 PE=1 SV=3	2	2
1005	Q9NY33	DPP3	Dipeptidyl peptidase 3 OS=Homo sapiens OX=9606 GN=DPP3 PE=1 SV=2	0	0
1006	P42126	ECI1	Enoyl-CoA delta isomerase 1, mitochondrial OS=Homo sapiens OX=9606 GN=ECI1 PE=1 SV=1	3	3
1007	P06730	EIF4E	Eukaryotic translation initiation factor 4E OS=Homo sapiens OX=9606 GN=EIF4E PE=1 SV=2	0	0
1008	P15090	FABP4	Fatty acid-binding protein, adipocyte OS=Homo sapiens OX=9606 GN=FABP4 PE=1 SV=3	0	1
1009	P11362	FGFR1	Fibroblast growth factor receptor 1 OS=Homo sapiens OX=9606 GN=FGFR1 PE=1 SV=3	0	0
1010	P09467	FBP1	Fructose-1,6-bisphosphatase 1 OS=Homo sapiens OX=9606 GN=FBP1 PE=1 SV=5	3	4
1011	P07954	FH	Fumarate hydratase, mitochondrial OS=Homo sapiens OX=9606 GN=FH PE=1 SV=3	6	7
1012	Q12931	TRAP1	Heat shock protein 75 kDa, mitochondrial OS=Homo sapiens OX=9606 GN=TRAP1 PE=1 SV=3	6	5
1013	P82970	HMGN5	High mobility group nucleosome-binding domain-containing protein 5 OS=Homo sapiens OX=9606 GN=HMGN5 PE=1 SV=1	4	0
1014	P17693	HLA-G	HLA class I histocompatibility antigen, alpha chain G OS=Homo sapiens OX=9606 GN=HLA-G PE=1 SV=1	1	1
1015	Q9Y5Q6	INSL5	Insulin-like peptide INSL5 OS=Homo sapiens OX=9606 GN=INSL5 PE=1 SV=2	1	6
1016	P27930	IL1R2	Interleukin-1 receptor type 2 OS=Homo sapiens OX=9606 GN=IL1R2 PE=1 SV=1	1	3
1017	Q9GZT8-3	NIF3L1	Isoform 3 of NIF3-like protein 1 OS=Homo sapiens OX=9606 GN=NIF3L1	4	2
1018	P29376-3	LTK	Isoform Lambda P3 of Leukocyte tyrosine kinase receptor OS=Homo sapiens OX=9606 GN=LTK	5	7
1019	Q13449	LSAMP	Limbic system-associated membrane protein OS=Homo sapiens OX=9606 GN=LSAMP PE=1 SV=2	7	9
1020	P42785	PRCP	Lysosomal Pro-X carboxypeptidase OS=Homo sapiens OX=9606 GN=PRCP PE=1 SV=1	0	0
1021	P40121	CAPG	Macrophage-capping protein OS=Homo sapiens OX=9606 GN=CAPG PE=1 SV=2	0	1
1022	P80297	MT1X	Metallothionein-1X OS=Homo sapiens OX=9606 GN=MT1X PE=1 SV=1	10	10
1023	P22234	PAICS	Multifunctional protein ADE2 OS=Homo sapiens OX=9606 GN=PAICS PE=1 SV=3	2	3
1024	Q15746	MYLK	Myosin light chain kinase, smooth muscle OS=Homo sapiens OX=9606 GN=MYLK PE=1 SV=4	3	5
1025	P23368	ME2	NAD-dependent malic enzyme, mitochondrial OS=Homo sapiens OX=9606 GN=ME2 PE=1 SV=1	0	0
1026	P48163	ME1	NADP-dependent malic enzyme OS=Homo sapiens OX=9606 GN=ME1 PE=1 SV=1	5	5
1027	Q7Z3B1	NEGR1	Neuronal growth regulator 1 OS=Homo sapiens OX=9606 GN=NEGR1 PE=1 SV=3	0	1
1028	Q15233	NONO	Non-POU domain-containing octamer-binding protein OS=Homo sapiens OX=9606 GN=NONO PE=1 SV=4	5	2
1029	P61970	NUTF2	Nuclear transport factor 2 OS=Homo sapiens OX=9606 GN=NUTF2 PE=1 SV=1	6	3
1030	P55209	NAP1L1	Nucleosome assembly protein 1-like 1 OS=Homo sapiens OX=9606 GN=NAP1L1 PE=1 SV=1	0	0
1031	Q9NQR4	NIT2	Omega-amidase NIT2 OS=Homo sapiens OX=9606 GN=NIT2 PE=1 SV=1	2	0
1032	Q8WWZ8	OIT3	Oncoprotein-induced transcript 3 protein OS=Homo sapiens OX=9606 GN=OIT3 PE=1 SV=2	6	6
1033	P45877	PPIC	Peptidyl-prolyl cis-trans isomerase C OS=Homo sapiens OX=9606 GN=PPIC PE=1 SV=1	5	3
1034	P43034	PAFAH1B1	Platelet-activating factor acetylhydrolase IB subunit alpha OS=Homo sapiens OX=9606 GN=PAFAH1B1 PE=1 SV=2	10	10
1035	P09668	CTSH	Pro-cathepsin H OS=Homo sapiens OX=9606 GN=CTSH PE=1 SV=4	4	2
1036	P35080	PFN2	Profilin-2 OS=Homo sapiens OX=9606 GN=PFN2 PE=1 SV=3	4	7
1037	P49721	PSMB2	Proteasome subunit beta type-2 OS=Homo sapiens OX=9606 GN=PSMB2 PE=1 SV=1	9	7
1038	Q96IU4	ABHD14B	Protein ABHD14B OS=Homo sapiens OX=9606 GN=ABHD14B PE=1 SV=1	1	0
1039	Q99873	PRMT1	Protein arginine N-methyltransferase 1 OS=Homo sapiens OX=9606 GN=PRMT1 PE=1 SV=3	9	10
1040	Q9NUQ9	FAM49B	Protein FAM49B OS=Homo sapiens OX=9606 GN=FAM49B PE=1 SV=1	7	4
1041	Q3SYG4	BBS9	Protein PTHB1 OS=Homo sapiens OX=9606 GN=BBS9 PE=1 SV=1	7	10
1042	P31949	S100A11	Protein S100-A11 OS=Homo sapiens OX=9606 GN=S100A11 PE=1 SV=2	7	7
1043	Q9HCL0	PCDH18	Protocadherin-18 OS=Homo sapiens OX=9606 GN=PCDH18 PE=2 SV=3	7	6
1044	P00491	PNP	Purine nucleoside phosphorylase OS=Homo sapiens OX=9606 GN=PNP PE=1 SV=2	0	0
1045	P46940	IQGAP1	Ras GTPase-activating-like protein IQGAP1 OS=Homo sapiens OX=9606 GN=IQGAP1 PE=1 SV=1	2	1
1046	Q15262	PTPRK	Receptor-type tyrosine-protein phosphatase kappa OS=Homo sapiens OX=9606 GN=PTPRK PE=1 SV=2	1	1
1047	P27694	RPA1	Replication protein A 70 kDa DNA-binding subunit OS=Homo sapiens OX=9606 GN=RPA1 PE=1 SV=2	5	6
1048	P21817	RYR1	Ryanodine receptor 1 OS=Homo sapiens OX=9606 GN=RYR1 PE=1 SV=3	6	3
1049	P62714	PPP2CB	Serine/threonine-protein phosphatase 2A catalytic subunit beta isoform OS=Homo sapiens OX=9606 GN=PPP2CB PE=1 SV=1	10	10
1050	Q9BRF8	CPPED1	Serine/threonine-protein phosphatase CPPED1 OS=Homo sapiens OX=9606 GN=CPPED1 PE=1 SV=3	3	3
1051	Q9H299	SH3BGRL3	SH3 domain-binding glutamic acid-rich-like protein 3 OS=Homo sapiens OX=9606 GN=SH3BGRL3 PE=1 SV=1	6	9
1052	P37108	SRP14	Signal recognition particle 14 kDa protein OS=Homo sapiens OX=9606 GN=SRP14 PE=1 SV=2	1	0
1053	Q04837	SSBP1	Single-stranded DNA-binding protein, mitochondrial OS=Homo sapiens OX=9606 GN=SSBP1 PE=1 SV=1	0	0
1054	P53794	SLC5A3	Sodium/myo-inositol cotransporter OS=Homo sapiens OX=9606 GN=SLC5A3 PE=1 SV=2	1	2
1055	Q00796	SORD	Sorbitol dehydrogenase OS=Homo sapiens OX=9606 GN=SORD PE=1 SV=4	7	6
1056	P23246	SFPQ	Splicing factor, proline- and glutamine-rich OS=Homo sapiens OX=9606 GN=SFPQ PE=1 SV=2	0	2
1057	P52823	STC1	Stanniocalcin-1 OS=Homo sapiens OX=9606 GN=STC1 PE=1 SV=1	1	0
1058	P63279	UBE2I	SUMO-conjugating enzyme UBC9 OS=Homo sapiens OX=9606 GN=UBE2I PE=1 SV=1	6	7
1059	P78371	CCT2	T-complex protein 1 subunit beta OS=Homo sapiens OX=9606 GN=CCT2 PE=1 SV=4	5	3
1060	O95399	UTS2	Urotensin-2 OS=Homo sapiens OX=9606 GN=UTS2 PE=1 SV=1	8	4
1061	O95861	BPNT1	3'(2'),5'-bisphosphate nucleotidase 1 OS=Homo sapiens OX=9606 GN=BPNT1 PE=1 SV=1	1	0
1062	Q9BUT1	BDH2	3-hydroxybutyrate dehydrogenase type 2 OS=Homo sapiens OX=9606 GN=BDH2 PE=1 SV=2	0	2
1063	Q8TD47	RPS4Y2	40S ribosomal protein S4, Y isoform 2 OS=Homo sapiens OX=9606 GN=RPS4Y2 PE=2 SV=3	6	3
1064	P32754	HPD	4-hydroxyphenylpyruvate dioxygenase OS=Homo sapiens OX=9606 GN=HPD PE=1 SV=2	1	0
1065	P30050	RPL12	60S ribosomal protein L12 OS=Homo sapiens OX=9606 GN=RPL12 PE=1 SV=1	0	0
1066	P26373	RPL13	60S ribosomal protein L13 OS=Homo sapiens OX=9606 GN=RPL13 PE=1 SV=4	1	0
1067	O15511	ARPC5	Actin-related protein 2/3 complex subunit 5 OS=Homo sapiens OX=9606 GN=ARPC5 PE=1 SV=3	1	0
1068	P13798	APEH	Acylamino-acid-releasing enzyme OS=Homo sapiens OX=9606 GN=APEH PE=1 SV=4	0	0
1069	Q9NX46	ADPRHL2	ADP-ribose glycohydrolase ARH3 OS=Homo sapiens OX=9606 GN=ADPRHL2 PE=1 SV=1	1	0
1070	P36405	ARL3	ADP-ribosylation factor-like protein 3 OS=Homo sapiens OX=9606 GN=ARL3 PE=1 SV=2	1	0
1071	Q96Q91	SLC4A9	Anion exchange protein 4 OS=Homo sapiens OX=9606 GN=SLC4A9 PE=2 SV=2	0	3
1072	P09525	ANXA4	Annexin A4 OS=Homo sapiens OX=9606 GN=ANXA4 PE=1 SV=4	1	1
1073	P08519	LPA	Apolipoprotein(a) OS=Homo sapiens OX=9606 GN=LPA PE=1 SV=1	5	2
1074	P07307	ASGR2	Asialoglycoprotein receptor 2 OS=Homo sapiens OX=9606 GN=ASGR2 PE=1 SV=2	0	2
1075	Q15121	PEA15	Astrocytic phosphoprotein PEA-15 OS=Homo sapiens OX=9606 GN=PEA15 PE=1 SV=2	1	1
1076	Q04118	PRB3	Basic salivary proline-rich protein 3 OS=Homo sapiens OX=9606 GN=PRB3 PE=1 SV=2	0	0
1077	P21810	BGN	Biglycan OS=Homo sapiens OX=9606 GN=BGN PE=1 SV=2	1	1
1078	P07738	BPGM	Bisphosphoglycerate mutase OS=Homo sapiens OX=9606 GN=BPGM PE=1 SV=2	0	0
1079	P54687	BCAT1	Branched-chain-amino-acid aminotransferase, cytosolic OS=Homo sapiens OX=9606 GN=BCAT1 PE=1 SV=3	0	0
1080	P07384	CAPN1	Calpain-1 catalytic subunit OS=Homo sapiens OX=9606 GN=CAPN1 PE=1 SV=1	0	0
1081	P13688	CEACAM1	Carcinoembryonic antigen-related cell adhesion molecule 1 OS=Homo sapiens OX=9606 GN=CEACAM1 PE=1 SV=2	0	0
1082	Q96AQ7	CIDEC	Cell death activator CIDE-3 OS=Homo sapiens OX=9606 GN=CIDEC PE=1 SV=1	0	0
1083	Q8N5R6	CCDC33	Coiled-coil domain-containing protein 33 OS=Homo sapiens OX=9606 GN=CCDC33 PE=1 SV=3	6	8
1084	Q07092	COL16A1	Collagen alpha-1(XVI) chain OS=Homo sapiens OX=9606 GN=COL16A1 PE=1 SV=2	0	0
1085	P08174	CD55	Complement decay-accelerating factor OS=Homo sapiens OX=9606 GN=CD55 PE=1 SV=4	1	1
1086	Q9UBG0	MRC2	C-type mannose receptor 2 OS=Homo sapiens OX=9606 GN=MRC2 PE=1 SV=2	3	2
1087	P21399	ACO1	Cytoplasmic aconitate hydratase OS=Homo sapiens OX=9606 GN=ACO1 PE=1 SV=3	6	3
1088	Q9UPW5	AGTPBP1	Cytosolic carboxypeptidase 1 OS=Homo sapiens OX=9606 GN=AGTPBP1 PE=1 SV=3	0	0
1089	Q9H993	ARMT1	Damage-control phosphatase ARMT1 OS=Homo sapiens OX=9606 GN=ARMT1 PE=1 SV=1	4	3
1090	Q9UBP4	DKK3	Dickkopf-related protein 3 OS=Homo sapiens OX=9606 GN=DKK3 PE=1 SV=2	2	6
1091	Q8TDJ6	DMXL2	DmX-like protein 2 OS=Homo sapiens OX=9606 GN=DMXL2 PE=1 SV=2	10	9
1092	Q8WW22	DNAJA4	DnaJ homolog subfamily A member 4 OS=Homo sapiens OX=9606 GN=DNAJA4 PE=1 SV=1	2	4
1093	O75937	DNAJC8	DnaJ homolog subfamily C member 8 OS=Homo sapiens OX=9606 GN=DNAJC8 PE=1 SV=2	0	0
1094	Q86UD3	MARCHF3	E3 ubiquitin-protein ligase MARCHF3 OS=Homo sapiens OX=9606 GN=MARCHF3 PE=1 SV=1	0	0
1095	Q93070	ART4	Ecto-ADP-ribosyltransferase 4 OS=Homo sapiens OX=9606 GN=ART4 PE=2 SV=2	0	0
1096	Q15717	ELAVL1	ELAV-like protein 1 OS=Homo sapiens OX=9606 GN=ELAVL1 PE=1 SV=2	2	3
1097	Q9HCU0	CD248	Endosialin OS=Homo sapiens OX=9606 GN=CD248 PE=1 SV=1	0	0
1098	P54764	EPHA4	Ephrin type-A receptor 4 OS=Homo sapiens OX=9606 GN=EPHA4 PE=1 SV=1	0	0
1099	P41091	EIF2S3	Eukaryotic translation initiation factor 2 subunit 3 OS=Homo sapiens OX=9606 GN=EIF2S3 PE=1 SV=3	0	0
1100	A5D6W6	FITM1	Fat storage-inducing transmembrane protein 1 OS=Homo sapiens OX=9606 GN=FITM1 PE=2 SV=1	6	3
1101	P49327	FASN	Fatty acid synthase OS=Homo sapiens OX=9606 GN=FASN PE=1 SV=3	5	5
1102	P07148	FABP1	Fatty acid-binding protein, liver OS=Homo sapiens OX=9606 GN=FABP1 PE=1 SV=1	0	0
1103	Q06828	FMOD	Fibromodulin OS=Homo sapiens OX=9606 GN=FMOD PE=1 SV=2	0	2
1104	Q5D862	FLG2	Filaggrin-2 OS=Homo sapiens OX=9606 GN=FLG2 PE=1 SV=1	2	1
1105	P17900	GM2A	Ganglioside GM2 activator OS=Homo sapiens OX=9606 GN=GM2A PE=1 SV=4	4	2
1106	O75487	GPC4	Glypican-4 OS=Homo sapiens OX=9606 GN=GPC4 PE=1 SV=4	3	4
1107	Q9Y625	GPC6	Glypican-6 OS=Homo sapiens OX=9606 GN=GPC6 PE=1 SV=1	0	2
1108	Q92598	HSPH1	Heat shock protein 105 kDa OS=Homo sapiens OX=9606 GN=HSPH1 PE=1 SV=1	0	0
1109	P04792	HSPB1	Heat shock protein beta-1 OS=Homo sapiens OX=9606 GN=HSPB1 PE=1 SV=2	3	4
1110	P08581	MET	Hepatocyte growth factor receptor OS=Homo sapiens OX=9606 GN=MET PE=1 SV=4	0	0
1111	P51991	HNRNPA3	Heterogeneous nuclear ribonucleoprotein A3 OS=Homo sapiens OX=9606 GN=HNRNPA3 PE=1 SV=2	0	0
1112	P52597	HNRNPF	Heterogeneous nuclear ribonucleoprotein F OS=Homo sapiens OX=9606 GN=HNRNPF PE=1 SV=3	0	0
1113	P31943	HNRNPH1	Heterogeneous nuclear ribonucleoprotein H OS=Homo sapiens OX=9606 GN=HNRNPH1 PE=1 SV=4	1	0
1114	Q14493	SLBP	Histone RNA hairpin-binding protein OS=Homo sapiens OX=9606 GN=SLBP PE=1 SV=1	9	7
1115	Q16543	CDC37	Hsp90 co-chaperone Cdc37 OS=Homo sapiens OX=9606 GN=CDC37 PE=1 SV=1	0	1
1116	A0A0A0MS14	IGHV1-45	Immunoglobulin heavy variable 1-45 OS=Homo sapiens OX=9606 GN=IGHV1-45 PE=3 SV=1	1	1
1117	Q8WWA0	ITLN1	Intelectin-1 OS=Homo sapiens OX=9606 GN=ITLN1 PE=1 SV=1	2	2
1118	Q13105-3	ZBTB17	Isoform 3 of Zinc finger and BTB domain-containing protein 17 OS=Homo sapiens OX=9606 GN=ZBTB17	5	8
1119	Q07666	KHDRBS1	KH domain-containing, RNA-binding, signal transduction-associated protein 1 OS=Homo sapiens OX=9606 GN=KHDRBS1 PE=1 SV=1	7	7
1120	P04156	PRNP	Major prion protein OS=Homo sapiens OX=9606 GN=PRNP PE=1 SV=1	4	2
1121	Q96JA4	MS4A14	Membrane-spanning 4-domains subfamily A member 14 OS=Homo sapiens OX=9606 GN=MS4A14 PE=2 SV=2	4	9
1122	Q9UJ70	NAGK	N-acetyl-D-glucosamine kinase OS=Homo sapiens OX=9606 GN=NAGK PE=1 SV=4	5	7
1123	Q92823	NRCAM	Neuronal cell adhesion molecule OS=Homo sapiens OX=9606 GN=NRCAM PE=1 SV=3	0	0
1124	Q14697	GANAB	Neutral alpha-glucosidase AB OS=Homo sapiens OX=9606 GN=GANAB PE=1 SV=3	2	3
1125	Q8NGA1	OR1M1	Olfactory receptor 1M1 OS=Homo sapiens OX=9606 GN=OR1M1 PE=2 SV=1	0	0
1126	O95428	PAPLN	Papilin OS=Homo sapiens OX=9606 GN=PAPLN PE=2 SV=4	0	0
1127	P78330	PSPH	Phosphoserine phosphatase OS=Homo sapiens OX=9606 GN=PSPH PE=1 SV=2	2	0
1128	P02775	PPBP	Platelet basic protein OS=Homo sapiens OX=9606 GN=PPBP PE=1 SV=3	5	4
1129	P09874	PARP1	Poly [ADP-ribose] polymerase 1 OS=Homo sapiens OX=9606 GN=PARP1 PE=1 SV=4	8	10
1130	Q9UKA9	PTBP2	Polypyrimidine tract-binding protein 2 OS=Homo sapiens OX=9606 GN=PTBP2 PE=1 SV=1	1	0
1131	P12273	PIP	Prolactin-inducible protein OS=Homo sapiens OX=9606 GN=PIP PE=1 SV=1	0	0
1132	Q96NZ9	PRAP1	Proline-rich acidic protein 1 OS=Homo sapiens OX=9606 GN=PRAP1 PE=1 SV=2	4	4
1133	Q8NBP7	PCSK9	Proprotein convertase subtilisin/kexin type 9 OS=Homo sapiens OX=9606 GN=PCSK9 PE=1 SV=3	0	0
1134	O43653	PSCA	Prostate stem cell antigen OS=Homo sapiens OX=9606 GN=PSCA PE=1 SV=2	3	2
1135	Q5TBA9	FRY	Protein furry homolog OS=Homo sapiens OX=9606 GN=FRY PE=1 SV=1	10	10
1136	Q96FQ6	S100A16	Protein S100-A16 OS=Homo sapiens OX=9606 GN=S100A16 PE=1 SV=1	3	2
1137	P62491	RAB11A	Ras-related protein Rab-11A OS=Homo sapiens OX=9606 GN=RAB11A PE=1 SV=3	5	7
1138	Q9Y5S9	RBM8A	RNA-binding protein 8A OS=Homo sapiens OX=9606 GN=RBM8A PE=1 SV=1	0	0
1139	Q9BRL6	SRSF8	Serine/arginine-rich splicing factor 8 OS=Homo sapiens OX=9606 GN=SRSF8 PE=1 SV=1	7	4
1140	P63151	PPP2R2A	Serine/threonine-protein phosphatase 2A 55 kDa regulatory subunit B alpha isoform OS=Homo sapiens OX=9606 GN=PPP2R2A PE=1 SV=1	0	0
1141	Q15257	PPP2R4	Serine/threonine-protein phosphatase 2A activator OS=Homo sapiens OX=9606 GN=PTPA PE=1 SV=3	0	0
1142	P62136	PPP1CA	Serine/threonine-protein phosphatase PP1-alpha catalytic subunit OS=Homo sapiens OX=9606 GN=PPP1CA PE=1 SV=1	0	6
1143	P48594	SERPINB4	Serpin B4 OS=Homo sapiens OX=9606 GN=SERPINB4 PE=1 SV=2	1	0
1144	Q6UWP8	SBSN	Suprabasin OS=Homo sapiens OX=9606 GN=SBSN PE=1 SV=2	0	0
1145	P18827	SDC1	Syndecan-1 OS=Homo sapiens OX=9606 GN=SDC1 PE=1 SV=3	0	0
1146	P34741	SDC2	Syndecan-2 OS=Homo sapiens OX=9606 GN=SDC2 PE=1 SV=2	1	1
1147	P01730	CD4	T-cell surface glycoprotein CD4 OS=Homo sapiens OX=9606 GN=CD4 PE=1 SV=1	7	10
1148	Q86V81	ALYREF	THO complex subunit 4 OS=Homo sapiens OX=9606 GN=ALYREF PE=1 SV=3	0	1
1149	Q969E4	TCEAL3	Transcription elongation factor A protein-like 3 OS=Homo sapiens OX=9606 GN=TCEAL3 PE=1 SV=1	1	0
1150	Q13263	TRIM28	Transcription intermediary factor 1-beta OS=Homo sapiens OX=9606 GN=TRIM28 PE=1 SV=5	0	0
1151	O94876	TMCC1	Transmembrane and coiled-coil domains protein 1 OS=Homo sapiens OX=9606 GN=TMCC1 PE=1 SV=3	6	7
1152	Q8NE00	TMEM104	Transmembrane protein 104 OS=Homo sapiens OX=9606 GN=TMEM104 PE=1 SV=2	0	1
1153	Q3LXA3	TKFC	Triokinase/FMN cyclase OS=Homo sapiens OX=9606 GN=TKFC PE=1 SV=2	0	0
1154	O95777	LSM8	U6 snRNA-associated Sm-like protein LSm8 OS=Homo sapiens OX=9606 GN=LSM8 PE=1 SV=3	0	0
1155	P45974	USP5	Ubiquitin carboxyl-terminal hydrolase 5 OS=Homo sapiens OX=9606 GN=USP5 PE=1 SV=2	0	0
1156	P61077	UBE2D3	Ubiquitin-conjugating enzyme E2 D3 OS=Homo sapiens OX=9606 GN=UBE2D3 PE=1 SV=1	4	9
1157	P61960	UFM1	Ubiquitin-fold modifier 1 OS=Homo sapiens OX=9606 GN=UFM1 PE=1 SV=1	0	0
1158	P54725	RAD23A	UV excision repair protein RAD23 homolog A OS=Homo sapiens OX=9606 GN=RAD23A PE=1 SV=1	3	6
1159	Q8TEU8	WFIKKN2	WAP, Kazal, immunoglobulin, Kunitz and NTR domain-containing protein 2 OS=Homo sapiens OX=9606 GN=WFIKKN2 PE=1 SV=1	0	0
1160	P52758	HRSP12	2-iminobutanoate/2-iminopropanoate deaminase OS=Homo sapiens OX=9606 GN=RIDA PE=1 SV=1	0	0
1161	P60866	RPS20	40S ribosomal protein S20 OS=Homo sapiens OX=9606 GN=RPS20 PE=1 SV=1	1	0
1162	P62854	RPS26	40S ribosomal protein S26 OS=Homo sapiens OX=9606 GN=RPS26 PE=1 SV=3	1	0
1163	Q9BRK5	SDF4	45 kDa calcium-binding protein OS=Homo sapiens OX=9606 GN=SDF4 PE=1 SV=1	0	0
1164	P10809	HSPD1	60 kDa heat shock protein, mitochondrial OS=Homo sapiens OX=9606 GN=HSPD1 PE=1 SV=2	2	0
1165	P84098	RPL19	60S ribosomal protein L19 OS=Homo sapiens OX=9606 GN=RPL19 PE=1 SV=1	2	0
1166	P61254	RPL26	60S ribosomal protein L26 OS=Homo sapiens OX=9606 GN=RPL26 PE=1 SV=1	2	4
1167	P47914	RPL29	60S ribosomal protein L29 OS=Homo sapiens OX=9606 GN=RPL29 PE=1 SV=2	0	0
1168	O95433	AHSA1	Activator of 90 kDa heat shock protein ATPase homolog 1 OS=Homo sapiens OX=9606 GN=AHSA1 PE=1 SV=1	6	5
1169	Q6DHV7	ADAL	Adenosine deaminase-like protein OS=Homo sapiens OX=9606 GN=ADAL PE=1 SV=2	5	2
1170	P24298	GPT	Alanine aminotransferase 1 OS=Homo sapiens OX=9606 GN=GPT PE=1 SV=3	0	0
1171	Q6FI81	CIAPIN1	Anamorsin OS=Homo sapiens OX=9606 GN=CIAPIN1 PE=1 SV=2	0	0
1172	Q9H672	ASB7	Ankyrin repeat and SOCS box protein 7 OS=Homo sapiens OX=9606 GN=ASB7 PE=1 SV=2	7	4
1173	Q6Q788	APOA5	Apolipoprotein A-V OS=Homo sapiens OX=9606 GN=APOA5 PE=1 SV=1	0	1
1174	Q9UII2	ATPIF1	ATPase inhibitor, mitochondrial OS=Homo sapiens OX=9606 GN=ATP5IF1 PE=1 SV=1	0	0
1175	O76031	CLPX	ATP-dependent Clp protease ATP-binding subunit clpX-like, mitochondrial OS=Homo sapiens OX=9606 GN=CLPX PE=1 SV=2	1	2
1176	Q9UIF9	BAZ2A	Bromodomain adjacent to zinc finger domain protein 2A OS=Homo sapiens OX=9606 GN=BAZ2A PE=1 SV=4	3	7
1177	P17612	PRKACA	cAMP-dependent protein kinase catalytic subunit alpha OS=Homo sapiens OX=9606 GN=PRKACA PE=1 SV=2	2	0
1178	Q96DG6	CMBL	Carboxymethylenebutenolidase homolog OS=Homo sapiens OX=9606 GN=CMBL PE=1 SV=1	2	2
1179	Q14002	CEACAM7	Carcinoembryonic antigen-related cell adhesion molecule 7 OS=Homo sapiens OX=9606 GN=CEACAM7 PE=1 SV=1	1	1
1180	P07711	CTSL	Cathepsin L1 OS=Homo sapiens OX=9606 GN=CTSL PE=1 SV=2	0	0
1181	Q9NNX6	CD209	CD209 antigen OS=Homo sapiens OX=9606 GN=CD209 PE=1 SV=1	0	0
1182	P13987	CD59	CD59 glycoprotein OS=Homo sapiens OX=9606 GN=CD59 PE=1 SV=1	7	9
1183	Q9BY67	CADM1	Cell adhesion molecule 1 OS=Homo sapiens OX=9606 GN=CADM1 PE=1 SV=2	0	0
1184	Q9NTU7	CBLN4	Cerebellin-4 OS=Homo sapiens OX=9606 GN=CBLN4 PE=1 SV=1	0	0
1185	P36222	CHI3L1	Chitinase-3-like protein 1 OS=Homo sapiens OX=9606 GN=CHI3L1 PE=1 SV=2	0	0
1186	Q6UVK1	CSPG4	Chondroitin sulfate proteoglycan 4 OS=Homo sapiens OX=9606 GN=CSPG4 PE=1 SV=2	0	0
1187	Q13112	CHAF1B	Chromatin assembly factor 1 subunit B OS=Homo sapiens OX=9606 GN=CHAF1B PE=1 SV=1	7	7
1188	P26992	CNTFR	Ciliary neurotrophic factor receptor subunit alpha OS=Homo sapiens OX=9606 GN=CNTFR PE=1 SV=2	3	3
1189	P48444	ARCN1	Coatomer subunit delta OS=Homo sapiens OX=9606 GN=ARCN1 PE=1 SV=1	1	0
1190	Q8IYE1	CCDC13	Coiled-coil domain-containing protein 13 OS=Homo sapiens OX=9606 GN=CCDC13 PE=1 SV=2	9	10
1191	Q5TID7	CCDC181	Coiled-coil domain-containing protein 181 OS=Homo sapiens OX=9606 GN=CCDC181 PE=2 SV=1	4	3
1192	Q14011	CIRBP	Cold-inducible RNA-binding protein OS=Homo sapiens OX=9606 GN=CIRBP PE=1 SV=1	5	6
1193	Q9BT78	COPS4	COP9 signalosome complex subunit 4 OS=Homo sapiens OX=9606 GN=COPS4 PE=1 SV=1	0	0
1194	Q92905	COPS5	COP9 signalosome complex subunit 5 OS=Homo sapiens OX=9606 GN=COPS5 PE=1 SV=4	0	0
1195	P18850	ATF6	Cyclic AMP-dependent transcription factor ATF-6 alpha OS=Homo sapiens OX=9606 GN=ATF6 PE=1 SV=3	0	0
1196	Q15828	CST6	Cystatin-M OS=Homo sapiens OX=9606 GN=CST6 PE=1 SV=1	0	0
1197	Q14574	DSC3	Desmocollin-3 OS=Homo sapiens OX=9606 GN=DSC3 PE=1 SV=3	0	0
1198	P15924	DSP	Desmoplakin OS=Homo sapiens OX=9606 GN=DSP PE=1 SV=3	1	2
1199	P53634	CTSC	Dipeptidyl peptidase 1 OS=Homo sapiens OX=9606 GN=CTSC PE=1 SV=2	0	0
1200	P28340	POLD1	DNA polymerase delta catalytic subunit OS=Homo sapiens OX=9606 GN=POLD1 PE=1 SV=2	2	6
1201	P36954	POLR2I	DNA-directed RNA polymerase II subunit RPB9 OS=Homo sapiens OX=9606 GN=POLR2I PE=1 SV=1	6	7
1202	Q9HCE0	EPG5	Ectopic P granules protein 5 homolog OS=Homo sapiens OX=9606 GN=EPG5 PE=1 SV=2	0	1
1203	Q9UHY7	ENOPH1	Enolase-phosphatase E1 OS=Homo sapiens OX=9606 GN=ENOPH1 PE=1 SV=1	1	0
1204	P23588	EIF4B	Eukaryotic translation initiation factor 4B OS=Homo sapiens OX=9606 GN=EIF4B PE=1 SV=2	2	1
1205	Q15056	EIF4H	Eukaryotic translation initiation factor 4H OS=Homo sapiens OX=9606 GN=EIF4H PE=1 SV=5	1	6
1206	P22455	FGFR4	Fibroblast growth factor receptor 4 OS=Homo sapiens OX=9606 GN=FGFR4 PE=1 SV=2	0	0
1207	P41250	GARS1	Glycine--tRNA ligase OS=Homo sapiens OX=9606 GN=GARS1 PE=1 SV=3	0	0
1208	Q8NCC3	PLA2G15	Group XV phospholipase A2 OS=Homo sapiens OX=9606 GN=PLA2G15 PE=1 SV=2	0	0
1209	Q9HAV0	GNB4	Guanine nucleotide-binding protein subunit beta-4 OS=Homo sapiens OX=9606 GN=GNB4 PE=1 SV=3	1	3
1210	P00492	HPRT1	Hypoxanthine-guanine phosphoribosyltransferase OS=Homo sapiens OX=9606 GN=HPRT1 PE=1 SV=2	0	1
1211	A0A075B6J6	IGLV3-22	Immunoglobulin lambda variable 3-22 OS=Homo sapiens OX=9606 GN=IGLV3-22 PE=3 SV=1	8	6
1212	P08833	IGFBP1	Insulin-like growth factor-binding protein 1 OS=Homo sapiens OX=9606 GN=IGFBP1 PE=1 SV=1	0	2
1213	Q99665	IL12RB2	Interleukin-12 receptor subunit beta-2 OS=Homo sapiens OX=9606 GN=IL12RB2 PE=1 SV=1	1	1
1214	Q9Y547	HSPB11	Intraflagellar transport protein 25 homolog OS=Homo sapiens OX=9606 GN=HSPB11 PE=1 SV=1	0	0
1215	Q9BX63-2	BRIP1	Isoform 2 of Fanconi anemia group J protein OS=Homo sapiens OX=9606 GN=BRIP1	0	0
1216	P14923	JUP	Junction plakoglobin OS=Homo sapiens OX=9606 GN=JUP PE=1 SV=3	0	0
1217	P24043	LAMA2	Laminin subunit alpha-2 OS=Homo sapiens OX=9606 GN=LAMA2 PE=1 SV=4	0	0
1218	Q16363	LAMA4	Laminin subunit alpha-4 OS=Homo sapiens OX=9606 GN=LAMA4 PE=1 SV=4	0	0
1219	P31025	LCN1	Lipocalin-1 OS=Homo sapiens OX=9606 GN=LCN1 PE=1 SV=1	5	7
1220	P19256	CD58	Lymphocyte function-associated antigen 3 OS=Homo sapiens OX=9606 GN=CD58 PE=1 SV=1	0	0
1221	P14174	MIF	Macrophage migration inhibitory factor OS=Homo sapiens OX=9606 GN=MIF PE=1 SV=4	2	3
1222	Q9H492	MAP1LC3A	Microtubule-associated proteins 1A/1B light chain 3A OS=Homo sapiens OX=9606 GN=MAP1LC3A PE=1 SV=2	0	0
1223	Q8TE76	MORC4	MORC family CW-type zinc finger protein 4 OS=Homo sapiens OX=9606 GN=MORC4 PE=1 SV=2	2	2
1224	O14950	MYL12B	Myosin regulatory light chain 12B OS=Homo sapiens OX=9606 GN=MYL12B PE=1 SV=2	6	2
1225	P58546	MTPN	Myotrophin OS=Homo sapiens OX=9606 GN=MTPN PE=1 SV=2	3	1
1226	Q09666	AHNAK	Neuroblast differentiation-associated protein AHNAK OS=Homo sapiens OX=9606 GN=AHNAK PE=1 SV=2	6	7
1227	Q99733	NAP1L4	Nucleosome assembly protein 1-like 4 OS=Homo sapiens OX=9606 GN=NAP1L4 PE=1 SV=1	2	3
1228	Q96DL1	NXPE2	NXPE family member 2 OS=Homo sapiens OX=9606 GN=NXPE2 PE=1 SV=2	5	7
1229	Q68BL8	OLFML2B	Olfactomedin-like protein 2B OS=Homo sapiens OX=9606 GN=OLFML2B PE=2 SV=2	0	0
1230	Q99650	OSMR	Oncostatin-M-specific receptor subunit beta OS=Homo sapiens OX=9606 GN=OSMR PE=1 SV=1	2	4
1231	P10451	SPP1	Osteopontin OS=Homo sapiens OX=9606 GN=SPP1 PE=1 SV=1	2	1
1232	O75475	PSIP1	PC4 and SFRS1-interacting protein OS=Homo sapiens OX=9606 GN=PSIP1 PE=1 SV=1	0	0
1233	P05121	SERPINE1	Plasminogen activator inhibitor 1 OS=Homo sapiens OX=9606 GN=SERPINE1 PE=1 SV=1	0	0
1234	Q15102	PAFAH1B3	Platelet-activating factor acetylhydrolase IB subunit gamma OS=Homo sapiens OX=9606 GN=PAFAH1B3 PE=1 SV=1	1	0
1235	P54277	PMS1	PMS1 protein homolog 1 OS=Homo sapiens OX=9606 GN=PMS1 PE=1 SV=1	10	10
1236	Q9H361	PABPC3	Polyadenylate-binding protein 3 OS=Homo sapiens OX=9606 GN=PABPC3 PE=1 SV=2	0	0
1237	Q9UHV9	PFDN2	Prefoldin subunit 2 OS=Homo sapiens OX=9606 GN=PFDN2 PE=1 SV=1	0	0
1238	Q8NB25	FAM184A	Protein FAM184A OS=Homo sapiens OX=9606 GN=FAM184A PE=2 SV=3	2	5
1239	Q53FT3	C11orf73	Protein Hikeshi OS=Homo sapiens OX=9606 GN=HIKESHI PE=1 SV=2	0	0
1240	Q6ZMI0	PPP1R21	Protein phosphatase 1 regulatory subunit 21 OS=Homo sapiens OX=9606 GN=PPP1R21 PE=1 SV=1	4	4
1241	P61457	PCBD1	Pterin-4-alpha-carbinolamine dehydratase OS=Homo sapiens OX=9606 GN=PCBD1 PE=1 SV=2	0	0
1242	Q7L7V1	DHX32	Putative pre-mRNA-splicing factor ATP-dependent RNA helicase DHX32 OS=Homo sapiens OX=9606 GN=DHX32 PE=1 SV=1	0	0
1243	O00764	PDXK	Pyridoxal kinase OS=Homo sapiens OX=9606 GN=PDXK PE=1 SV=1	1	4
1244	Q08257	CRYZ	Quinone oxidoreductase OS=Homo sapiens OX=9606 GN=CRYZ PE=1 SV=1	0	0
1245	P59190	RAB15	Ras-related protein Rab-15 OS=Homo sapiens OX=9606 GN=RAB15 PE=1 SV=1	2	0
1246	P62820	RAB1A	Ras-related protein Rab-1A OS=Homo sapiens OX=9606 GN=RAB1A PE=1 SV=3	1	0
1247	P15927	RPA2	Replication protein A 32 kDa subunit OS=Homo sapiens OX=9606 GN=RPA2 PE=1 SV=1	0	0
1248	O95980	RECK	Reversion-inducing cysteine-rich protein with Kazal motifs OS=Homo sapiens OX=9606 GN=RECK PE=1 SV=1	0	0
1249	P52566	ARHGDIB	Rho GDP-dissociation inhibitor 2 OS=Homo sapiens OX=9606 GN=ARHGDIB PE=1 SV=3	0	0
1250	P16083	NQO2	Ribosyldihydronicotinamide dehydrogenase [quinone] OS=Homo sapiens OX=9606 GN=NQO2 PE=1 SV=5	0	0
1251	Q01844	EWSR1	RNA-binding protein EWS OS=Homo sapiens OX=9606 GN=EWSR1 PE=1 SV=1	1	2
1252	P49903	SEPHS1	Selenide, water dikinase 1 OS=Homo sapiens OX=9606 GN=SEPHS1 PE=1 SV=2	0	0
1253	Q9UHD8	SEPTIN9	Septin-9 OS=Homo sapiens OX=9606 GN=SEPTIN9 PE=1 SV=2	10	10
1254	P30153	PPP2R1A	Serine/threonine-protein phosphatase 2A 65 kDa regulatory subunit A alpha isoform OS=Homo sapiens OX=9606 GN=PPP2R1A PE=1 SV=4	1	0
1255	P49591	SARS1	Serine--tRNA ligase, cytoplasmic OS=Homo sapiens OX=9606 GN=SARS1 PE=1 SV=3	1	0
1256	O00241	SIRPB1	Signal-regulatory protein beta-1 OS=Homo sapiens OX=9606 GN=SIRPB1 PE=1 SV=5	0	0
1257	P62318	SNRPD3	Small nuclear ribonucleoprotein Sm D3 OS=Homo sapiens OX=9606 GN=SNRPD3 PE=1 SV=1	0	0
1258	O76061	STC2	Stanniocalcin-2 OS=Homo sapiens OX=9606 GN=STC2 PE=1 SV=1	0	0
1259	Q7KZF4	SND1	Staphylococcal nuclease domain-containing protein 1 OS=Homo sapiens OX=9606 GN=SND1 PE=1 SV=1	2	1
1260	Q8TAQ9	SUN3	SUN domain-containing protein 3 OS=Homo sapiens OX=9606 GN=SUN3 PE=1 SV=4	9	10
1261	Q8TER0	SNED1	Sushi, nidogen and EGF-like domain-containing protein 1 OS=Homo sapiens OX=9606 GN=SNED1 PE=2 SV=2	5	1
1262	P17987	TCP1	T-complex protein 1 subunit alpha OS=Homo sapiens OX=9606 GN=TCP1 PE=1 SV=1	1	1
1263	P49368	CCT3	T-complex protein 1 subunit gamma OS=Homo sapiens OX=9606 GN=CCT3 PE=1 SV=4	1	1
1264	P52888	THOP1	Thimet oligopeptidase OS=Homo sapiens OX=9606 GN=THOP1 PE=1 SV=2	0	0
1265	Q6NT04	TIGD7	Tigger transposable element-derived protein 7 OS=Homo sapiens OX=9606 GN=TIGD7 PE=1 SV=1	0	2
1266	Q8WUA8	TSKU	Tsukushin OS=Homo sapiens OX=9606 GN=TSKU PE=2 SV=3	0	0
1267	P09936	UCHL1	Ubiquitin carboxyl-terminal hydrolase isozyme L1 OS=Homo sapiens OX=9606 GN=UCHL1 PE=1 SV=2	8	3
1268	P07911	UMOD	Uromodulin OS=Homo sapiens OX=9606 GN=UMOD PE=1 SV=1	0	0
1269	Q9P2Y5	UVRAG	UV radiation resistance-associated gene protein OS=Homo sapiens OX=9606 GN=UVRAG PE=1 SV=1	2	2
1270	Q86Y38	XYLT1	Xylosyltransferase 1 OS=Homo sapiens OX=9606 GN=XYLT1 PE=1 SV=1	1	0
1271	Q7Z340	ZNF551	Zinc finger protein 551 OS=Homo sapiens OX=9606 GN=ZNF551 PE=1 SV=3	5	3
1272	P46783	RPS10	40S ribosomal protein S10 OS=Homo sapiens OX=9606 GN=RPS10 PE=1 SV=1	8	5
1273	P62266	RPS23	40S ribosomal protein S23 OS=Homo sapiens OX=9606 GN=RPS23 PE=1 SV=3	1	0
1274	P62851	RPS25	40S ribosomal protein S25 OS=Homo sapiens OX=9606 GN=RPS25 PE=1 SV=1	0	0
1275	P46782	RPS5	40S ribosomal protein S5 OS=Homo sapiens OX=9606 GN=RPS5 PE=1 SV=4	6	6
1276	P62081	RPS7	40S ribosomal protein S7 OS=Homo sapiens OX=9606 GN=RPS7 PE=1 SV=1	0	0
1277	P62241	RPS8	40S ribosomal protein S8 OS=Homo sapiens OX=9606 GN=RPS8 PE=1 SV=2	1	1
1278	Q9H6S1	AZI2	5-azacytidine-induced protein 2 OS=Homo sapiens OX=9606 GN=AZI2 PE=1 SV=1	10	10
1279	P27635	RPL10	60S ribosomal protein L10 OS=Homo sapiens OX=9606 GN=RPL10 PE=1 SV=4	0	0
1280	P62913	RPL11	60S ribosomal protein L11 OS=Homo sapiens OX=9606 GN=RPL11 PE=1 SV=2	1	1
1281	Q02543	RPL18A	60S ribosomal protein L18a OS=Homo sapiens OX=9606 GN=RPL18A PE=1 SV=2	0	0
1282	P62750	RPL23A	60S ribosomal protein L23a OS=Homo sapiens OX=9606 GN=RPL23A PE=1 SV=1	0	0
1283	P83731	RPL24	60S ribosomal protein L24 OS=Homo sapiens OX=9606 GN=RPL24 PE=1 SV=1	0	0
1284	P61353	RPL27	60S ribosomal protein L27 OS=Homo sapiens OX=9606 GN=RPL27 PE=1 SV=2	2	3
1285	P18077	RPL35A	60S ribosomal protein L35a OS=Homo sapiens OX=9606 GN=RPL35A PE=1 SV=2	1	3
1286	P63173	RPL38	60S ribosomal protein L38 OS=Homo sapiens OX=9606 GN=RPL38 PE=1 SV=2	6	4
1287	Q02878	RPL6	60S ribosomal protein L6 OS=Homo sapiens OX=9606 GN=RPL6 PE=1 SV=3	1	0
1288	Q86TH1	ADAMTSL2	ADAMTS-like protein 2 OS=Homo sapiens OX=9606 GN=ADAMTSL2 PE=1 SV=1	0	0
1289	Q6UY14	ADAMTSL4	ADAMTS-like protein 4 OS=Homo sapiens OX=9606 GN=ADAMTSL4 PE=1 SV=2	0	0
1290	O95996	APC2	Adenomatous polyposis coli protein 2 OS=Homo sapiens OX=9606 GN=APC2 PE=1 SV=1	0	1
1291	Q9HBW9	ADGRL4	Adhesion G protein-coupled receptor L4 OS=Homo sapiens OX=9606 GN=ADGRL4 PE=1 SV=3	0	0
1292	P10109	FDX1	Adrenodoxin, mitochondrial OS=Homo sapiens OX=9606 GN=FDX1 PE=1 SV=1	2	0
1293	O43488	AKR7A2	Aflatoxin B1 aldehyde reductase member 2 OS=Homo sapiens OX=9606 GN=AKR7A2 PE=1 SV=3	0	0
1294	P49588	AARS1	Alanine--tRNA ligase, cytoplasmic OS=Homo sapiens OX=9606 GN=AARS1 PE=1 SV=2	0	0
1295	Q96C23	GALM	Aldose 1-epimerase OS=Homo sapiens OX=9606 GN=GALM PE=1 SV=1	0	0
1296	Q10469	MGAT2	Alpha-1,6-mannosyl-glycoprotein 2-beta-N-acetylglucosaminyltransferase OS=Homo sapiens OX=9606 GN=MGAT2 PE=1 SV=1	0	0
1297	P51693	APLP1	Amyloid-like protein 1 OS=Homo sapiens OX=9606 GN=APLP1 PE=1 SV=3	0	0
1298	Q06481	APLP2	Amyloid-like protein 2 OS=Homo sapiens OX=9606 GN=APLP2 PE=1 SV=2	0	0
1299	Q9H6X2	ANTXR1	Anthrax toxin receptor 1 OS=Homo sapiens OX=9606 GN=ANTXR1 PE=1 SV=2	0	0
1300	Q9BZZ5	API5	Apoptosis inhibitor 5 OS=Homo sapiens OX=9606 GN=API5 PE=1 SV=3	3	2
1301	Q9ULZ3	PYCARD	Apoptosis-associated speck-like protein containing a CARD OS=Homo sapiens OX=9606 GN=PYCARD PE=1 SV=2	0	0
1302	P04424	ASL	Argininosuccinate lyase OS=Homo sapiens OX=9606 GN=ASL PE=1 SV=4	6	7
1303	P14868	DARS1	Aspartate--tRNA ligase, cytoplasmic OS=Homo sapiens OX=9606 GN=DARS1 PE=1 SV=2	2	0
1304	Q9ULA0	DNPEP	Aspartyl aminopeptidase OS=Homo sapiens OX=9606 GN=DNPEP PE=1 SV=1	0	0
1305	O43491	EPB41L2	Band 4.1-like protein 2 OS=Homo sapiens OX=9606 GN=EPB41L2 PE=1 SV=1	3	3
1306	O75531	BANF1	Barrier-to-autointegration factor OS=Homo sapiens OX=9606 GN=BANF1 PE=1 SV=1	0	0
1307	P52848	NDST1	Bifunctional heparan sulfate N-deacetylase/N-sulfotransferase 1 OS=Homo sapiens OX=9606 GN=NDST1 PE=1 SV=1	0	0
1308	P17655	CAPN2	Calpain-2 catalytic subunit OS=Homo sapiens OX=9606 GN=CAPN2 PE=1 SV=6	0	0
1309	Q9H4D0	CLSTN2	Calsyntenin-2 OS=Homo sapiens OX=9606 GN=CLSTN2 PE=1 SV=2	7	9
1310	Q92887	ABCC2	Canalicular multispecific organic anion transporter 1 OS=Homo sapiens OX=9606 GN=ABCC2 PE=1 SV=3	0	0
1311	Q14444	CAPRIN1	Caprin-1 OS=Homo sapiens OX=9606 GN=CAPRIN1 PE=1 SV=2	0	0
1312	Q8NCH0	CHST14	Carbohydrate sulfotransferase 14 OS=Homo sapiens OX=9606 GN=CHST14 PE=1 SV=2	3	1
1313	Q7LGC8	CHST3	Carbohydrate sulfotransferase 3 OS=Homo sapiens OX=9606 GN=CHST3 PE=1 SV=3	0	0
1314	P15086	CPB1	Carboxypeptidase B OS=Homo sapiens OX=9606 GN=CPB1 PE=1 SV=4	1	2
1315	O15467	CCL16	C-C motif chemokine 16 OS=Homo sapiens OX=9606 GN=CCL16 PE=1 SV=1	0	0
1316	P55774	CCL18	C-C motif chemokine 18 OS=Homo sapiens OX=9606 GN=CCL18 PE=1 SV=1	1	1
1317	P62633	CNBP	Cellular nucleic acid-binding protein OS=Homo sapiens OX=9606 GN=CNBP PE=1 SV=1	1	0
1318	Q00610	CLTC	Clathrin heavy chain 1 OS=Homo sapiens OX=9606 GN=CLTC PE=1 SV=5	1	0
1319	Q11206	ST3GAL4	CMP-N-acetylneuraminate-beta-galactosamide-alpha-2,3-sialyltransferase 4 OS=Homo sapiens OX=9606 GN=ST3GAL4 PE=2 SV=1	0	0
1320	P53621	COPA	Coatomer subunit alpha OS=Homo sapiens OX=9606 GN=COPA PE=1 SV=2	0	0
1321	P35606	COPB2	Coatomer subunit beta' OS=Homo sapiens OX=9606 GN=COPB2 PE=1 SV=2	4	6
1322	Q07021	C1QBP	Complement component 1 Q subcomponent-binding protein, mitochondrial OS=Homo sapiens OX=9606 GN=C1QBP PE=1 SV=1	0	1
1323	O00244	ATOX1	Copper transport protein ATOX1 OS=Homo sapiens OX=9606 GN=ATOX1 PE=1 SV=1	0	0
1324	O75367	H2AFY	Core histone macro-H2A.1 OS=Homo sapiens OX=9606 GN=MACROH2A1 PE=1 SV=4	0	0
1325	Q9BR76	CORO1B	Coronin-1B OS=Homo sapiens OX=9606 GN=CORO1B PE=1 SV=1	0	0
1326	O43175	PHGDH	D-3-phosphoglycerate dehydrogenase OS=Homo sapiens OX=9606 GN=PHGDH PE=1 SV=4	1	0
1327	Q8TEA8	DTD1	D-aminoacyl-tRNA deacylase 1 OS=Homo sapiens OX=9606 GN=DTD1 PE=1 SV=2	2	0
1328	Q02413	DSG1	Desmoglein-1 OS=Homo sapiens OX=9606 GN=DSG1 PE=1 SV=2	1	3
1329	P52434	POLR2H	DNA-directed RNA polymerases I, II, and III subunit RPABC3 OS=Homo sapiens OX=9606 GN=POLR2H PE=1 SV=4	0	0
1330	Q16643	DBN1	Drebrin OS=Homo sapiens OX=9606 GN=DBN1 PE=1 SV=4	0	3
1331	Q13508	ART3	Ecto-ADP-ribosyltransferase 3 OS=Homo sapiens OX=9606 GN=ART3 PE=1 SV=2	1	3
1332	O75354	ENTPD6	Ectonucleoside triphosphate diphosphohydrolase 6 OS=Homo sapiens OX=9606 GN=ENTPD6 PE=1 SV=3	3	1
1333	P30040	ERP29	Endoplasmic reticulum resident protein 29 OS=Homo sapiens OX=9606 GN=ERP29 PE=1 SV=4	8	9
1334	O60869	EDF1	Endothelial differentiation-related factor 1 OS=Homo sapiens OX=9606 GN=EDF1 PE=1 SV=1	0	0
1335	P15170	GSPT1	Eukaryotic peptide chain release factor GTP-binding subunit ERF3A OS=Homo sapiens OX=9606 GN=GSPT1 PE=1 SV=1	0	0
1336	P55884	EIF3B	Eukaryotic translation initiation factor 3 subunit B OS=Homo sapiens OX=9606 GN=EIF3B PE=1 SV=3	0	0
1337	Q13347	EIF3I	Eukaryotic translation initiation factor 3 subunit I OS=Homo sapiens OX=9606 GN=EIF3I PE=1 SV=1	0	0
1338	Q9Y262	EIF3L	Eukaryotic translation initiation factor 3 subunit L OS=Homo sapiens OX=9606 GN=EIF3L PE=1 SV=1	2	3
1339	Q04637	EIF4G1	Eukaryotic translation initiation factor 4 gamma 1 OS=Homo sapiens OX=9606 GN=EIF4G1 PE=1 SV=4	0	0
1340	P56537	EIF6	Eukaryotic translation initiation factor 6 OS=Homo sapiens OX=9606 GN=EIF6 PE=1 SV=1	0	0
1341	P39748	FEN1	Flap endonuclease 1 OS=Homo sapiens OX=9606 GN=FEN1 PE=1 SV=1	5	7
1342	Q13630	TSTA3	GDP-L-fucose synthase OS=Homo sapiens OX=9606 GN=TSTA3 PE=1 SV=1	0	0
1343	O60763	USO1	General vesicular transport factor p115 OS=Homo sapiens OX=9606 GN=USO1 PE=1 SV=2	0	0
1344	O60234	GMFG	Glia maturation factor gamma OS=Homo sapiens OX=9606 GN=GMFG PE=1 SV=1	1	0
1345	P15104	GLUL	Glutamine synthetase OS=Homo sapiens OX=9606 GN=GLUL PE=1 SV=4	0	0
1346	Q16769	QPCT	Glutaminyl-peptide cyclotransferase OS=Homo sapiens OX=9606 GN=QPCT PE=1 SV=1	0	1
1347	O76003	GLRX3	Glutaredoxin-3 OS=Homo sapiens OX=9606 GN=GLRX3 PE=1 SV=2	0	0
1348	P78333	GPC5	Glypican-5 OS=Homo sapiens OX=9606 GN=GPC5 PE=2 SV=1	0	0
1349	P10912	GHR	Growth hormone receptor OS=Homo sapiens OX=9606 GN=GHR PE=1 SV=1	0	0
1350	Q9H0R4	HDHD2	Haloacid dehalogenase-like hydrolase domain-containing protein 2 OS=Homo sapiens OX=9606 GN=HDHD2 PE=1 SV=1	0	0
1351	P09601	HMOX1	Heme oxygenase 1 OS=Homo sapiens OX=9606 GN=HMOX1 PE=1 SV=1	3	3
1352	P19367	HK1	Hexokinase-1 OS=Homo sapiens OX=9606 GN=HK1 PE=1 SV=3	0	0
1353	P49773	HINT1	Histidine triad nucleotide-binding protein 1 OS=Homo sapiens OX=9606 GN=HINT1 PE=1 SV=2	1	1
1354	Q01581	HMGCS1	Hydroxymethylglutaryl-CoA synthase, cytoplasmic OS=Homo sapiens OX=9606 GN=HMGCS1 PE=1 SV=2	1	0
1355	Q14974	KPNB1	Importin subunit beta-1 OS=Homo sapiens OX=9606 GN=KPNB1 PE=1 SV=2	1	0
1356	Q14623	IHH	Indian hedgehog protein OS=Homo sapiens OX=9606 GN=IHH PE=1 SV=4	0	0
1357	Q9H2U2	PPA2	Inorganic pyrophosphatase 2, mitochondrial OS=Homo sapiens OX=9606 GN=PPA2 PE=1 SV=2	1	1
1358	Q9NVH2	INTS7	Integrator complex subunit 7 OS=Homo sapiens OX=9606 GN=INTS7 PE=1 SV=1	0	1
1359	P32942	ICAM3	Intercellular adhesion molecule 3 OS=Homo sapiens OX=9606 GN=ICAM3 PE=1 SV=2	0	0
1360	P09913	IFIT2	Interferon-induced protein with tetratricopeptide repeats 2 OS=Homo sapiens OX=9606 GN=IFIT2 PE=1 SV=1	0	0
1361	Q9Y3B8-3	REXO2	Isoform 3 of Oligoribonuclease, mitochondrial OS=Homo sapiens OX=9606 GN=REXO2	2	1
1362	Q9P266	KIAA1462	Junctional protein associated with coronary artery disease OS=Homo sapiens OX=9606 GN=JCAD PE=1 SV=3	0	0
1363	Q14767	LTBP2	Latent-transforming growth factor beta-binding protein 2 OS=Homo sapiens OX=9606 GN=LTBP2 PE=1 SV=3	0	0
1364	P05455	SSB	Lupus La protein OS=Homo sapiens OX=9606 GN=SSB PE=1 SV=2	0	0
1365	Q9UM22	EPDR1	Mammalian ependymin-related protein 1 OS=Homo sapiens OX=9606 GN=EPDR1 PE=1 SV=2	0	0
1366	P08493	MGP	Matrix Gla protein OS=Homo sapiens OX=9606 GN=MGP PE=1 SV=2	0	0
1367	P55145	MANF	Mesencephalic astrocyte-derived neurotrophic factor OS=Homo sapiens OX=9606 GN=MANF PE=1 SV=3	1	5
1368	P56192	MARS1	Methionine--tRNA ligase, cytoplasmic OS=Homo sapiens OX=9606 GN=MARS1 PE=1 SV=2	7	5
1369	P55083	MFAP4	Microfibril-associated glycoprotein 4 OS=Homo sapiens OX=9606 GN=MFAP4 PE=1 SV=2	5	2
1370	Q969H8	MYDGF	Myeloid-derived growth factor OS=Homo sapiens OX=9606 GN=MYDGF PE=1 SV=1	2	3
1371	Q99972	MYOC	Myocilin OS=Homo sapiens OX=9606 GN=MYOC PE=1 SV=2	6	2
1372	P02144	MB	Myoglobin OS=Homo sapiens OX=9606 GN=MB PE=1 SV=2	1	0
1373	Q15843	NEDD8	NEDD8 OS=Homo sapiens OX=9606 GN=NEDD8 PE=1 SV=1	0	0
1374	P10153	RNASE2	Non-secretory ribonuclease OS=Homo sapiens OX=9606 GN=RNASE2 PE=1 SV=2	4	5
1375	Q96RS6	NUDCD1	NudC domain-containing protein 1 OS=Homo sapiens OX=9606 GN=NUDCD1 PE=1 SV=2	0	0
1376	Q8NGP0	OR4C13	Olfactory receptor 4C13 OS=Homo sapiens OX=9606 GN=OR4C13 PE=2 SV=2	4	5
1377	Q8NHB8	OR5K2	Olfactory receptor 5K2 OS=Homo sapiens OX=9606 GN=OR5K2 PE=2 SV=3	0	1
1378	Q96HC4	PDLIM5	PDZ and LIM domain protein 5 OS=Homo sapiens OX=9606 GN=PDLIM5 PE=1 SV=5	0	0
1379	P42336	PIK3CA	Phosphatidylinositol 4,5-bisphosphate 3-kinase catalytic subunit alpha isoform OS=Homo sapiens OX=9606 GN=PIK3CA PE=1 SV=2	2	0
1380	Q01814	ATP2B2	Plasma membrane calcium-transporting ATPase 2 OS=Homo sapiens OX=9606 GN=ATP2B2 PE=1 SV=2	1	3
1381	P40197	GP5	Platelet glycoprotein V OS=Homo sapiens OX=9606 GN=GP5 PE=1 SV=1	0	0
1382	P68402	PAFAH1B2	Platelet-activating factor acetylhydrolase IB subunit beta OS=Homo sapiens OX=9606 GN=PAFAH1B2 PE=1 SV=1	0	0
1383	P09619	PDGFRB	Platelet-derived growth factor receptor beta OS=Homo sapiens OX=9606 GN=PDGFRB PE=1 SV=1	0	0
1384	O15031	PLXNB2	Plexin-B2 OS=Homo sapiens OX=9606 GN=PLXNB2 PE=1 SV=3	0	0
1385	P61758	VBP1	Prefoldin subunit 3 OS=Homo sapiens OX=9606 GN=VBP1 PE=1 SV=4	0	0
1386	Q99471	PFDN5	Prefoldin subunit 5 OS=Homo sapiens OX=9606 GN=PFDN5 PE=1 SV=2	0	0
1387	A0A0C4DH30	IGHV3-16	Probable non-functional immunoglobulin heavy variable 3-16 OS=Homo sapiens OX=9606 GN=IGHV3-16 PE=5 SV=1	1	2
1388	Q15185	PTGES3	Prostaglandin E synthase 3 OS=Homo sapiens OX=9606 GN=PTGES3 PE=1 SV=1	3	4
1389	Q9P2B2	PTGFRN	Prostaglandin F2 receptor negative regulator OS=Homo sapiens OX=9606 GN=PTGFRN PE=1 SV=2	0	0
1390	Q9UL46	PSME2	Proteasome activator complex subunit 2 OS=Homo sapiens OX=9606 GN=PSME2 PE=1 SV=4	0	0
1391	Q92530	PSMF1	Proteasome inhibitor PI31 subunit OS=Homo sapiens OX=9606 GN=PSMF1 PE=1 SV=2	4	3
1392	P28065	PSMB9	Proteasome subunit beta type-9 OS=Homo sapiens OX=9606 GN=PSMB9 PE=1 SV=2	0	0
1393	P35659	DEK	Protein DEK OS=Homo sapiens OX=9606 GN=DEK PE=1 SV=1	1	4
1394	Q8WZA1	POMGNT1	Protein O-linked-mannose beta-1,2-N-acetylglucosaminyltransferase 1 OS=Homo sapiens OX=9606 GN=POMGNT1 PE=1 SV=2	0	3
1395	Q96A00	PPP1R14A	Protein phosphatase 1 regulatory subunit 14A OS=Homo sapiens OX=9606 GN=PPP1R14A PE=1 SV=1	0	0
1396	Q96C90	PPP1R14B	Protein phosphatase 1 regulatory subunit 14B OS=Homo sapiens OX=9606 GN=PPP1R14B PE=1 SV=3	0	0
1397	Q9UN70	PCDHGC3	Protocadherin gamma-C3 OS=Homo sapiens OX=9606 GN=PCDHGC3 PE=1 SV=1	3	0
1398	Q9HBR0	SLC38A10	Putative sodium-coupled neutral amino acid transporter 10 OS=Homo sapiens OX=9606 GN=SLC38A10 PE=1 SV=2	0	0
1399	Q15404	RSU1	Ras suppressor protein 1 OS=Homo sapiens OX=9606 GN=RSU1 PE=1 SV=3	0	0
1400	P60763	RAC3	Ras-related C3 botulinum toxin substrate 3 OS=Homo sapiens OX=9606 GN=RAC3 PE=1 SV=1	2	1
1401	P11233	RALA	Ras-related protein Ral-A OS=Homo sapiens OX=9606 GN=RALA PE=1 SV=1	0	0
1402	Q96HR9	REEP6	Receptor expression-enhancing protein 6 OS=Homo sapiens OX=9606 GN=REEP6 PE=1 SV=2	4	1
1403	P17081	RHOQ	Rho-related GTP-binding protein RhoQ OS=Homo sapiens OX=9606 GN=RHOQ PE=1 SV=2	0	0
1404	O00584	RNASET2	Ribonuclease T2 OS=Homo sapiens OX=9606 GN=RNASET2 PE=1 SV=2	0	0
1405	O76021	RSL1D1	Ribosomal L1 domain-containing protein 1 OS=Homo sapiens OX=9606 GN=RSL1D1 PE=1 SV=3	1	0
1406	Q9P2E9	RRBP1	Ribosome-binding protein 1 OS=Homo sapiens OX=9606 GN=RRBP1 PE=1 SV=5	0	0
1407	Q96MK2	FAM65C	RIPOR family member 3 OS=Homo sapiens OX=9606 GN=RIPOR3 PE=1 SV=4	0	3
1408	Q12765	SCRN1	Secernin-1 OS=Homo sapiens OX=9606 GN=SCRN1 PE=1 SV=2	0	0
1409	O95084	PRSS23	Serine protease 23 OS=Homo sapiens OX=9606 GN=PRSS23 PE=1 SV=1	4	6
1410	P83110	HTRA3	Serine protease HTRA3 OS=Homo sapiens OX=9606 GN=HTRA3 PE=1 SV=2	2	0
1411	Q96P63	SERPINB12	Serpin B12 OS=Homo sapiens OX=9606 GN=SERPINB12 PE=1 SV=1	4	5
1412	P49458	SRP9	Signal recognition particle 9 kDa protein OS=Homo sapiens OX=9606 GN=SRP9 PE=1 SV=2	0	0
1413	P62314	SNRPD1	Small nuclear ribonucleoprotein Sm D1 OS=Homo sapiens OX=9606 GN=SNRPD1 PE=1 SV=1	0	0
1414	P62316	SNRPD2	Small nuclear ribonucleoprotein Sm D2 OS=Homo sapiens OX=9606 GN=SNRPD2 PE=1 SV=1	0	1
1415	Q13126	MTAP	S-methyl-5'-thioadenosine phosphorylase OS=Homo sapiens OX=9606 GN=MTAP PE=1 SV=2	0	0
1416	P63208	SKP1	S-phase kinase-associated protein 1 OS=Homo sapiens OX=9606 GN=SKP1 PE=1 SV=2	0	0
1417	P26368	U2AF2	Splicing factor U2AF 65 kDa subunit OS=Homo sapiens OX=9606 GN=U2AF2 PE=1 SV=4	0	0
1418	Q0VAF6	SYCN	Syncollin OS=Homo sapiens OX=9606 GN=SYCN PE=2 SV=1	5	7
1419	P48643	CCT5	T-complex protein 1 subunit epsilon OS=Homo sapiens OX=9606 GN=CCT5 PE=1 SV=1	0	0
1420	Q99832	CCT7	T-complex protein 1 subunit eta OS=Homo sapiens OX=9606 GN=CCT7 PE=1 SV=2	0	0
1421	Q9UGI8	TES	Testin OS=Homo sapiens OX=9606 GN=TES PE=1 SV=1	0	0
1422	O43657	TSPAN6	Tetraspanin-6 OS=Homo sapiens OX=9606 GN=TSPAN6 PE=1 SV=1	1	0
1423	P26639	TARS1	Threonine--tRNA ligase 1, cytoplasmic OS=Homo sapiens OX=9606 GN=TARS1 PE=1 SV=3	1	1
1424	Q9P016	THYN1	Thymocyte nuclear protein 1 OS=Homo sapiens OX=9606 GN=THYN1 PE=1 SV=1	0	0
1425	Q9UKU6	TRHDE	Thyrotropin-releasing hormone-degrading ectoenzyme OS=Homo sapiens OX=9606 GN=TRHDE PE=2 SV=1	0	0
1426	Q07157	TJP1	Tight junction protein ZO-1 OS=Homo sapiens OX=9606 GN=TJP1 PE=1 SV=3	0	0
1427	Q9Y4K3	TRAF6	TNF receptor-associated factor 6 OS=Homo sapiens OX=9606 GN=TRAF6 PE=1 SV=1	0	0
1428	O60602	TLR5	Toll-like receptor 5 OS=Homo sapiens OX=9606 GN=TLR5 PE=1 SV=4	1	0
1429	P20062	TCN2	Transcobalamin-2 OS=Homo sapiens OX=9606 GN=TCN2 PE=1 SV=3	0	0
1430	Q99598	TSNAX	Translin-associated protein X OS=Homo sapiens OX=9606 GN=TSNAX PE=1 SV=1	0	0
1431	Q9Y333	LSM2	U6 snRNA-associated Sm-like protein LSm2 OS=Homo sapiens OX=9606 GN=LSM2 PE=1 SV=1	2	1
1432	Q9Y3C8	UFC1	Ubiquitin-fold modifier-conjugating enzyme 1 OS=Homo sapiens OX=9606 GN=UFC1 PE=1 SV=3	5	8
1433	Q9GZZ9	UBA5	Ubiquitin-like modifier-activating enzyme 5 OS=Homo sapiens OX=9606 GN=UBA5 PE=1 SV=1	8	3
1434	P05161	ISG15	Ubiquitin-like protein ISG15 OS=Homo sapiens OX=9606 GN=ISG15 PE=1 SV=5	2	3
1435	Q9H5V9	CXorf56	UPF0428 protein CXorf56 OS=Homo sapiens OX=9606 GN=CXorf56 PE=1 SV=1	2	2
1436	Q15326	ZMYND11	Zinc finger MYND domain-containing protein 11 OS=Homo sapiens OX=9606 GN=ZMYND11 PE=1 SV=2	0	4

## Sheet: Table S2
Table S2. Dysregulated proteins.
				Valid values		Log2.Fold change (PCOS/non-PCO)	sPLS-DA (PCOS vs non-PCOS)		T-test	Secreted
No.	Accession	Gene Symbol	Description	non-PCO	PCOS		coef	component	p-value
1	P11279	LAMP1	Lysosome-associated membrane glycoprotein 1 (LAMP-1) (Lysosome-associated membrane protein 1) (CD107 antigen-like family member A) (CD antigen CD107a)	9	9	2.37197	0.00852424	comp1	0.0492326
2	P29376-3	LTK	Leukocyte tyrosine kinase receptor (EC 2.7.10.1) (Protein tyrosine kinase 1)	5	7	1.92101	0.0251696	comp1	0.00192505
3	A0A0B4J1Y8	IGLV9-49	Immunoglobulin lambda variable 9-49	10	10	1.85643	0.172038	comp1	0.0012913
4	P07305	H1F0	Histone H1.0 (Histone H1') (Histone H1(0)) [Cleaved into: Histone H1.0, N-terminally processed]	7	7	-1.65498	-0.041817273; -0.018333349	comp1; comp2	0.0152249
5	Q96DL1	NXPE2	NXPE family member 2 (Protein FAM55B)	5	7	1.61609	0.0617051	comp1	0.000182187
6	P20618	PSMB1	Proteasome subunit beta type-1 (Macropain subunit C5) (Multicatalytic endopeptidase complex subunit C5) (Proteasome component C5) (Proteasome gamma chain)	9	10	1.51452	0.160771189; 0.083408145	comp1; comp2	0.00121094
7	P01871	IGHM	Immunoglobulin heavy constant mu (Ig mu chain C region) (Ig mu chain C region BOT) (Ig mu chain C region GAL) (Ig mu chain C region OU)	10	10	-1.27248	-0.180173	comp1	0.000927899	+
8	P55287	CDH11	Cadherin-11 (OSF-4) (Osteoblast cadherin) (OB-cadherin)	10	10	1.20298	0.00869287	comp1	0.0729656
9	Q68DL7	C18orf63	Uncharacterized protein C18orf63	10	10	1.20139	0.220071	comp1	0.00018134
10	P22676	CALB2	Calretinin (CR) (29 kDa calbindin)	10	8	1.19204	0.045677315; 0.098007685	comp1; comp2	0.0245184
11	P47972	NPTX2	Neuronal pentraxin-2 (NP2) (Neuronal pentraxin II) (NP-II)	10	10	1.18221	0.0473814	comp1	0.0323703	+
12	P08779	KRT16	Keratin, type I cytoskeletal 16 (Cytokeratin-16) (CK-16) (Keratin-16) (K16)	10	10	1.17222	0.0732667	comp1	0.0186373
13	P07686	HEXB	Beta-hexosaminidase subunit beta (EC 3.2.1.52) (Beta-N-acetylhexosaminidase subunit beta) (Hexosaminidase subunit B) (Cervical cancer proto-oncogene 7 protein) (HCC-7) (N-acetyl-beta-glucosaminidase subunit beta) [Cleaved into: Beta-hexosaminidase subunit beta chain B; Beta-hexosaminidase subunit beta chain A]	6	7	1.10637	0.0824419	comp1	0.000331894
14	P02538	KRT6A	Keratin, type II cytoskeletal 6A (Cytokeratin-6A) (CK-6A) (Cytokeratin-6D) (CK-6D) (Keratin-6A) (K6A) (Type-II keratin Kb6) (allergen Hom s 5)	10	10	1.05516	0.0513738	comp1	0.0325218
15	Q14118	DAG1	Dystroglycan (Dystrophin-associated glycoprotein 1) [Cleaved into: Alpha-dystroglycan (Alpha-DG); Beta-dystroglycan (Beta-DG)]	10	10	-1.05173	-0.0164349	comp1	0.0566152	+
16	P32119	PRDX2	Peroxiredoxin-2 (EC 1.11.1.24) (Natural killer cell-enhancing factor B) (NKEF-B) (PRP) (Thiol-specific antioxidant protein) (TSA) (Thioredoxin peroxidase 1) (Thioredoxin-dependent peroxide reductase 1) (Thioredoxin-dependent peroxiredoxin 2)	10	10	-1.04573	-0.0421442	comp1	0.0358836
17	P01699	IGLV1-44	Immunoglobulin lambda variable 1-44 (Ig lambda chain V-I region MEM) (Ig lambda chain V-I region VOR)	10	10	1.03168	0.107767	comp1	0.0120559
18	Q9NP58	ABCB6	ATP-binding cassette sub-family B member 6 (ABC-type heme transporter ABCB6) (EC 7.6.2.5) (Mitochondrial ABC transporter 3) (Mt-ABC transporter 3) (P-glycoprotein-related protein) (Ubiquitously-expressed mammalian ABC half transporter)	8	8	-0.96225	-0.0106529	comp1	0.0323063
19	Q13867	BLMH	Bleomycin hydrolase (BH) (BLM hydrolase) (BMH) (EC 3.4.22.40)	6	10	0.93915	0.008412593; 0.118212564	comp1; comp2	0.0255282
20	Q8N474	SFRP1	Secreted frizzled-related protein 1 (FRP-1) (sFRP-1) (Secreted apoptosis-related protein 2) (SARP-2)	10	10	-0.93452	-0.0299173	comp1	0.0436618	+
21	A0A075B6J9	IGLV2-18	Immunoglobulin lambda variable 2-18	10	9	0.933104	0.0158313	comp1	0.045548
22	P06702	S100A9	Protein S100-A9 (Calgranulin-B) (Calprotectin L1H subunit) (Leukocyte L1 complex heavy chain) (Migration inhibitory factor-related protein 14) (MRP-14) (p14) (S100 calcium-binding protein A9)	10	10	0.915622	0.0406494	comp1	0.0398416	+
23	P0DOX6	IGM	Immunoglobulin mu heavy chain (Immunoglobulin mu heavy chain OU)	10	10	-0.890452	-0.142211	comp1	0.00330254
24	A0A075B6K4	IGLV3-10	Immunoglobulin lambda variable 3-10	10	10	0.871962	0.239103	comp1	0.000129769
25	Q7Z6Z7	HUWE1	E3 ubiquitin-protein ligase HUWE1 (EC 2.3.2.26) (ARF-binding protein 1) (ARF-BP1) (HECT, UBA and WWE domain-containing protein 1) (HECT-type E3 ubiquitin transferase HUWE1) (Homologous to E6AP carboxyl terminus homologous protein 9) (HectH9) (Large structure of UREB1) (LASU1) (Mcl-1 ubiquitin ligase E3) (Mule) (Upstream regulatory element-binding protein 1) (URE-B1) (URE-binding protein 1)	10	10	0.842194	0.0437432	comp1	0.0370359
26	A0A0J9YXX1	IGHV5-10-1	Immunoglobulin heavy variable 5-10-1	10	10	0.828384	0.0531478	comp1	0.0280299
27	P00338	LDHA	L-lactate dehydrogenase A chain (LDH-A) (EC 1.1.1.27) (Cell proliferation-inducing gene 19 protein) (LDH muscle subunit) (LDH-M) (Renal carcinoma antigen NY-REN-59)	10	10	-0.817109	-0.00261244	comp1	0.0692469
28	P28070	PSMB4	Proteasome subunit beta type-4 (26 kDa prosomal protein) (HsBPROS26) (PROS-26) (Macropain beta chain) (Multicatalytic endopeptidase complex beta chain) (Proteasome beta chain) (Proteasome chain 3) (HsN3)	9	10	-0.80564	-0.0118803	comp1	0.0576399
29	P01704	IGLV2-14	Immunoglobulin lambda variable 2-14 (Ig lambda chain V-II region NIG-84) (Ig lambda chain V-II region TOG) (Ig lambda chain V-II region VIL)	10	10	0.766775	0.113348	comp1	0.00755961
30	P01717	IGLV3-25	Immunoglobulin lambda variable 3-25 (Ig lambda chain V-IV region Hil)	10	10	0.731087	0.229863	comp1	0.000123635
31	Q92496	CFHR4	Complement factor H-related protein 4 (FHR-4)	10	10	-0.704218	-0.0712062	comp1	0.0207189	+
32	P13645	KRT10	Keratin, type I cytoskeletal 10 (Cytokeratin-10) (CK-10) (Keratin-10) (K10)	10	10	0.689396	0.082749	comp1	0.0159815
33	O43866	CD5L	CD5 antigen-like (Apoptosis inhibitor expressed by macrophages) (hAIM) (CT-2) (IgM-associated peptide) (SP-alpha)	10	10	-0.686437	-0.094888	comp1	0.0137509	+
34	Q14019	COTL1	Coactosin-like protein	9	8	-0.671127	-0.0110516	comp2	0.332875
35	P01591	IGJ	Immunoglobulin J chain (Joining chain of multimeric IgA and IgM)	10	10	-0.654562	-0.109476015; -0.043206448	comp1; comp2	0.0081043	+
36	A0A087WSX0	IGLV5-45	Immunoglobulin lambda variable 5-45	10	10	-0.643213	-0.00312704	comp1	0.0692292
37	P35908	KRT2	Keratin, type II cytoskeletal 2 epidermal (Cytokeratin-2e) (CK-2e) (Epithelial keratin-2e) (Keratin-2 epidermis) (Keratin-2e) (K2e) (Type-II keratin Kb2)	10	10	0.63224	0.0169584	comp1	0.0546537
38	Q13387	MAPK8IP2	C-Jun-amino-terminal kinase-interacting protein 2 (JIP-2) (JNK-interacting protein 2) (Islet-brain-2) (IB-2) (JNK MAP kinase scaffold protein 2) (Mitogen-activated protein kinase 8-interacting protein 2)	10	10	0.611879	0.244318	comp1	0.000102121
39	P01599	IGKV1-17	Immunoglobulin kappa variable 1-17 (Ig kappa chain V-I region Gal) (Ig kappa chain V-I region WEA)	10	10	0.566049	0.0823408	comp1	0.0155602
40	P06312	IGKV4-1	Immunoglobulin kappa variable 4-1 (Ig kappa chain V-IV region B17) (Ig kappa chain V-IV region JI) (Ig kappa chain V-IV region Len) (Ig kappa chain V-IV region STH)	10	10	0.5628	0.189269	comp1	0.000665111
41	P35443	THBS4	Thrombospondin-4	10	10	-0.547683	-0.0368819	comp1	0.0388656	+
42	Q99459	CDC5L	Cell division cycle 5-like protein (Cdc5-like protein) (Pombe cdc5-related protein)	10	10	0.547291	0.102393	comp1	0.00952074
43	P07585	DCN	Decorin (Bone proteoglycan II) (PG-S2) (PG40)	10	10	0.529649	0.165111	comp1	0.00210336	+
44	Q9UJ70	NAGK	N-acetyl-D-glucosamine kinase (N-acetylglucosamine kinase) (EC 2.7.1.59) (GlcNAc kinase)	5	7	-0.528004	-0.0846836	comp2	0.148551
45	A0A0C4DH31	IGHV1-18	Immunoglobulin heavy variable 1-18	10	10	0.508783	0.0667693	comp1	0.0256305
46	P23083	IGHV1-2	Immunoglobulin heavy variable 1-2 (Ig heavy chain V-I region ND) (Ig heavy chain V-I region V35)	10	10	0.499075	0.0558554	comp1	0.0314065
47	A0A075B6R2	IGHV4-4	Immunoglobulin heavy variable 4-4	10	10	0.495629	0.046062	comp1	0.032242
48	P01714	IGLV3-19	Immunoglobulin lambda variable 3-19 (Ig lambda chain V-III region SH)	10	10	0.4943	0.101064	comp1	0.0139833
49	A0A075B6K5	IGLV3-9	Immunoglobulin lambda variable 3-9	10	10	0.491193	0.171199	comp1	0.00191084
50	Q9UGM5	FETUB	Fetuin-B (16G2) (Fetuin-like protein IRL685) (Gugu)	10	10	0.486323	0.113495	comp1	0.00716612	+
51	P15311	EZR	Ezrin (Cytovillin) (Villin-2) (p81)	10	10	-0.484736	-0.0632631	comp1	0.02377
52	P80748	IGLV3-21	Immunoglobulin lambda variable 3-21 (Ig lambda chain V-III region LOI) (Ig lambda chain V-V region DEL) (Ig lambda chain V-VII region MOT)	10	10	0.484363	0.160681	comp1	0.00269311
53	Q6VAB6	KSR2	Kinase suppressor of Ras 2 (hKSR2) (EC 2.7.11.1)	10	10	-0.48402	-0.0550135	comp1	0.0271957
54	P01706	IGLV2-11	Immunoglobulin lambda variable 2-11 (Ig gamma lambda chain V-II region DOT) (Ig lambda chain V-II region BOH) (Ig lambda chain V-II region BUR) (Ig lambda chain V-II region NIG-58) (Ig lambda chain V-II region TRO) (Ig lambda chain V-II region WIN)	10	10	0.481775	0.140791	comp1	0.00359175
55	Q01973	ROR1	Inactive tyrosine-protein kinase transmembrane receptor ROR1 (Neurotrophic tyrosine kinase, receptor-related 1)	10	10	0.478378	0.0369364	comp1	0.0394672
56	P00748	F12	Coagulation factor XII (EC 3.4.21.38) (Hageman factor) (HAF) [Cleaved into: Coagulation factor XIIa heavy chain; Beta-factor XIIa part 1; Coagulation factor XIIa light chain (Beta-factor XIIa part 2)]	10	10	0.47511	0.070255	comp1	0.0199553	+
57	P0DSN7	IGKV1D-37	Probable non-functional immunoglobulinn kappa variable 1D-37	10	10	0.471853	0.0408138	comp1	0.0357836
58	P01718	IGLV3-27	Immunoglobulin lambda variable 3-27 (Ig lambda chain V-IV region Kern)	10	10	0.470252	0.17331	comp1	0.00118643
59	Q9Y5Z4	HEBP2	Heme-binding protein 2 (Placental protein 23) (PP23) (Protein SOUL)	10	9	0.459817	0.0636187	comp1	0.0173405
60	P02745	C1QA	Complement C1q subcomponent subunit A	10	10	-0.458989	-0.0856943	comp1	0.0140783	+
61	P08238	HSP90AB1	Heat shock protein HSP 90-beta (HSP 90) (Heat shock 84 kDa) (HSP 84) (HSP84)	10	10	-0.458093	-0.0593889	comp1	0.0313679
62	A0A075B6K0	IGLV3-16	Immunoglobulin lambda variable 3-16	10	10	0.456694	0.173024	comp1	0.0012233
63	P33908	MAN1A1	Mannosyl-oligosaccharide 1,2-alpha-mannosidase IA (EC 3.2.1.113) (Man(9)-alpha-mannosidase) (Man9-mannosidase) (Mannosidase alpha class 1A member 1) (Processing alpha-1,2-mannosidase IA) (Alpha-1,2-mannosidase IA)	10	10	0.451799	0.117132	comp1	0.00786998
64	P10643	C7	Complement component C7	10	10	0.451311	0.149831	comp1	0.00407929	+
65	A0A087WSY6	IGKV3D-15	Immunoglobulin kappa variable 3D-15	10	10	0.450534	0.127901	comp1	0.00785466
66	A0A0A0MT36	IGKV6D-21	Immunoglobulin kappa variable 6D-21	10	10	-0.43049	-0.024923989; -0.02385735	comp1; comp2	0.0535836
67	Q9NPH3	IL1RAP	Interleukin-1 receptor accessory protein (IL-1 receptor accessory protein) (IL-1RAcP) (EC 3.2.2.6) (Interleukin-1 receptor 3) (IL-1R-3) (IL-1R3)	10	10	-0.429218	-0.063845482; -0.026344194	comp1; comp2	0.022624	+
68	A0A075B6K2	IGLV3-12	Immunoglobulin lambda variable 3-12	10	10	0.429067	0.121233	comp1	0.00827989
69	P01715	IGLV3-1	Immunoglobulin lambda variable 3-1 (Ig lambda chain V-IV region Bau) (Ig lambda chain V-IV region MOL) (Ig lambda chain V-IV region X)	10	10	0.425674	0.125828	comp1	0.0076303
70	P01764	IGHV3-23	Immunoglobulin heavy variable 3-23 (Ig heavy chain V-III region LAY) (Ig heavy chain V-III region POM) (Ig heavy chain V-III region TEI) (Ig heavy chain V-III region TIL) (Ig heavy chain V-III region TUR) (Ig heavy chain V-III region VH26) (Ig heavy chain V-III region WAS) (Ig heavy chain V-III region ZAP)	10	10	0.424613	0.200767	comp1	0.000419502
71	P54277	PMS1	PMS1 protein homolog 1 (DNA mismatch repair protein PMS1)	10	10	0.422057	0.0333713	comp1	0.0433231
72	P01701	IGLV1-51	Immunoglobulin lambda variable 1-51 (Ig lambda chain V-I region BL2) (Ig lambda chain V-I region EPS) (Ig lambda chain V-I region NEW) (Ig lambda chain V-I region NIG-64)	10	10	0.421504	0.132281	comp1	0.0049116
73	Q12884	FAP	Prolyl endopeptidase FAP (EC 3.4.21.26) (170 kDa melanoma membrane-bound gelatinase) (Dipeptidyl peptidase FAP) (EC 3.4.14.5) (Fibroblast activation protein alpha) (FAPalpha) (Gelatine degradation protease FAP) (EC 3.4.21.-) (Integral membrane serine protease) (Post-proline cleaving enzyme) (Serine integral membrane protease) (SIMP) (Surface-expressed protease) (Seprase) [Cleaved into: Antiplasmi…	10	10	0.421056	0.0990238	comp1	0.014249	+
74	P55103	INHBC	Inhibin beta C chain (Activin beta-C chain)	10	10	-0.399263	-0.0217216	comp1	0.0505429	+
75	P0DOX2	IGA2	Immunoglobulin alpha-2 heavy chain (Immunoglobulin alpha-2 heavy chain BUT)	10	10	0.394243	0.138397	comp1	0.00361235
76	Q9Y3F4	STRAP	Serine-threonine kinase receptor-associated protein (MAP activator with WD repeats) (UNR-interacting protein) (WD-40 repeat protein PT-WD)	8	9	-0.391696	-0.0215579	comp2	0.428003
77	A0A075B6J1	IGLV5-37	Immunoglobulin lambda variable 5-37	8	10	0.382569	0.0102562	comp2	0.467753
78	P01703	IGLV1-40	Immunoglobulin lambda variable 1-40 (Ig lambda chain V-I region NEWM)	10	10	0.370014	0.0345067	comp1	0.043182
79	P01876	IGHA1	Immunoglobulin heavy constant alpha 1 (Ig alpha-1 chain C region) (Ig alpha-1 chain C region BUR) (Ig alpha-1 chain C region TRO)	10	10	0.343151	0.0743973	comp1	0.0184804
80	P07237	P4HB	Protein disulfide-isomerase (PDI) (EC 5.3.4.1) (Cellular thyroid hormone-binding protein) (Prolyl 4-hydroxylase subunit beta) (p55)	10	10	-0.335483	-0.0195044	comp1	0.0609101	+
81	P02747	C1QC	Complement C1q subcomponent subunit C	10	10	-0.33098	-0.0428347	comp1	0.0343956	+
82	Q01082	SPTBN1	Spectrin beta chain, non-erythrocytic 1 (Beta-II spectrin) (Fodrin beta chain) (Spectrin, non-erythroid beta chain 1)	9	10	0.323307	0.00675779	comp2	0.411062
83	P04066	FUCA1	Tissue alpha-L-fucosidase (EC 3.2.1.51) (Alpha-L-fucosidase I) (Alpha-L-fucoside fucohydrolase 1) (Alpha-L-fucosidase 1)	10	10	-0.319861	-0.102257	comp2	0.0811211
84	P0DOY2	IGLC2	Immunoglobulin lambda constant 2 (Ig lambda chain C region Kern) (Ig lambda chain C region NIG-64) (Ig lambda chain C region SH) (Ig lambda chain C region X) (Ig lambda-2 chain C region)	10	10	0.319008	0.184762	comp1	0.000921704
85	P43652	AFM	Afamin (Alpha-albumin) (Alpha-Alb)	10	10	-0.311823	-0.069331205; -0.182668309	comp1; comp2	0.0231359	+
86	A0A075B6H9	IGLV4-69	Immunoglobulin lambda variable 4-69	10	10	0.306003	0.026591965; 0.06027541	comp1; comp2	0.0472363
87	P0DOX8	IGL1	Immunoglobulin lambda-1 light chain (Immunoglobulin lambda-1 light chain MCG)	10	10	0.302895	0.160149	comp1	0.00195478
88	A0M8Q6	IGLC7	Immunoglobulin lambda constant 7 (Ig lambda-7 chain C region)	10	10	0.2974	0.161321	comp1	0.00180326
89	Q9UHD8	SEPTIN9	Septin-9 (MLL septin-like fusion protein MSF-A) (MLL septin-like fusion protein) (Ovarian/Breast septin) (Ov/Br septin) (Septin D1)	10	10	-0.297397	0.0158373	comp2	0.35407
90	P11766	ADH5	Alcohol dehydrogenase class-3 (EC 1.1.1.1) (Alcohol dehydrogenase 5) (Alcohol dehydrogenase class chi chain) (Alcohol dehydrogenase class-III) (Glutathione-dependent formaldehyde dehydrogenase) (FALDH) (FDH) (GSH-FDH) (EC 1.1.1.-) (S-(hydroxymethyl)glutathione dehydrogenase) (EC 1.1.1.284)	10	10	-0.283209	-0.075588	comp2	0.634135
91	Q9BXR6	CFHR5	Complement factor H-related protein 5 (FHR-5)	10	10	0.27866	0.00555745	comp1	0.0677202	+
92	P05154	SERPINA5	Plasma serine protease inhibitor (Acrosomal serine protease inhibitor) (Plasminogen activator inhibitor 3) (PAI-3) (PAI3) (Protein C inhibitor) (PCI) (Serpin A5)	10	10	-0.272217	-0.0105998	comp1	0.0606865	+
93	P01782	IGHV3-9	Immunoglobulin heavy variable 3-9 (Ig heavy chain V-III region DOB)	10	10	0.267906	0.0370005	comp1	0.0390855
94	P01619	IGKV3-20	Immunoglobulin kappa variable 3-20 (Ig kappa chain V-III region B6) (Ig kappa chain V-III region GOL) (Ig kappa chain V-III region HAH) (Ig kappa chain V-III region HIC) (Ig kappa chain V-III region IARC/BL41) (Ig kappa chain V-III region NG9) (Ig kappa chain V-III region SIE) (Ig kappa chain V-III region Ti) (Ig kappa chain V-III region WOL)	10	10	0.25905	0.00406315	comp1	0.071799
95	A0A0C4DH73	IGKV1-12	Immunoglobulin kappa variable 1-12	10	10	0.256541	0.0505021	comp1	0.0300231
96	A4UGR9	XIRP2	Xin actin-binding repeat-containing protein 2 (Beta-xin) (Cardiomyopathy-associated protein 3) (Xeplin)	10	10	0.242805	0.0768403	comp2	0.540929
97	P62714	PPP2CB	Serine/threonine-protein phosphatase 2A catalytic subunit beta isoform (PP2A-beta) (EC 3.1.3.16)	10	10	-0.239816	-0.086938413; -0.048498125	comp1; comp2	0.0139217
98	P00450	CP	Ceruloplasmin (EC 1.16.3.1) (Ferroxidase)	10	10	0.232603	0.00854445	comp1	0.0692793	+
99	Q16586	SGCA	Alpha-sarcoglycan (Alpha-SG) (50 kDa dystrophin-associated glycoprotein) (50DAG) (Adhalin) (Dystroglycan-2)	10	10	0.225469	0.120977	comp2	0.38703
100	Q969T7	NT5C3B	7-methylguanosine phosphate-specific 5'-nucleotidase (7-methylguanosine nucleotidase) (EC 3.1.3.91) (Cytosolic 5'-nucleotidase 3B) (Cytosolic 5'-nucleotidase III-like protein) (cN-III-like protein) (EC 3.1.3.5) (N(7)-methylguanylate 5'-phosphatase)	10	10	-0.224979	-0.008488249; -0.111635124	comp1; comp2	0.0675419
101	P0DOX5	IGG1	Immunoglobulin gamma-1 heavy chain (Immunoglobulin gamma-1 heavy chain NIE)	10	10	0.224571	0.097934028; -0.054974884	comp1; comp2	0.0121597
102	Q5XPI4	RNF123	E3 ubiquitin-protein ligase RNF123 (EC 2.3.2.27) (Kip1 ubiquitination-promoting complex protein 1) (RING finger protein 123) (RING-type E3 ubiquitin transferase RNF123)	10	10	-0.222971	-0.0418986	comp2	0.309922
103	P01860	IGHG3	Immunoglobulin heavy constant gamma 3 (HDC) (Heavy chain disease protein) (Ig gamma-3 chain C region)	10	10	0.211089	0.058463305; -0.025227474	comp1; comp2	0.0253367
104	O75882	ATRN	Attractin (DPPT-L) (Mahogany homolog)	10	10	-0.196382	-0.0136003	comp1	0.057734
105	Q07666	KHDRBS1	KH domain-containing, RNA-binding, signal transduction-associated protein 1 (GAP-associated tyrosine phosphoprotein p62) (Src-associated in mitosis 68 kDa protein) (Sam68) (p21 Ras GTPase-activating protein-associated p62) (p68)	7	7	0.180064	0.0496307	comp2	0.50727
106	P16401	HIST1H1B	Histone H1.5 (Histone H1a) (Histone H1b) (Histone H1s-3)	7	9	0.172453	0.0871562	comp2	0.743067
107	P05997	COL5A2	Collagen alpha-2(V) chain	10	10	-0.169681	-0.0126083	comp2	0.419315	+
108	P01834	IGKC	Immunoglobulin kappa constant (Ig kappa chain C region) (Ig kappa chain C region AG) (Ig kappa chain C region CUM) (Ig kappa chain C region EU) (Ig kappa chain C region OU) (Ig kappa chain C region ROY) (Ig kappa chain C region TI)	10	10	0.158435	0.0000977; -0.056223565	comp1; comp2	0.0723269
109	P22223	CDH3	Cadherin-3 (Placental cadherin) (P-cadherin)	7	5	-0.108417	-0.00821392	comp2	0.839661
110	P09874	PARP1	Poly [ADP-ribose] polymerase 1 (PARP-1) (EC 2.4.2.30) (ADP-ribosyltransferase diphtheria toxin-like 1) (ARTD1) (DNA ADP-ribosyltransferase PARP1) (EC 2.4.2.-) (NAD(+) ADP-ribosyltransferase 1) (ADPRT 1) (Poly[ADP-ribose] synthase 1) (Protein poly-ADP-ribosyltransferase PARP1) (EC 2.4.2.-)	8	10	-0.0949297	0.00279242	comp2	0.696101
111	P35080	PFN2	Profilin-2 (Profilin II)	4	7	-0.0947416	-0.0193801	comp2	0.868307
112	Q9Y5F6-2	PCDHGC5	Protocadherin gamma-C5 (PCDH-gamma-C5)	10	10	0.052814	0.0366145	comp2	0.878981
113	Q9H6S1	AZI2	5-azacytidine-induced protein 2 (NF-kappa-B-activating kinase-associated protein 1) (Nak-associated protein 1) (TILP)	10	10	0.0454368	0.127874	comp2	0.892872
114	P13987	CD59	CD59 glycoprotein (1F5 antigen) (20 kDa homologous restriction factor) (HRF-20) (HRF20) (MAC-inhibitory protein) (MAC-IP) (MEM43 antigen) (Membrane attack complex inhibition factor) (MACIF) (Membrane inhibitor of reactive lysis) (MIRL) (Protectin) (CD antigen CD59)	7	9	-0.0198806	-0.0267744	comp2	0.941804	+
115	Q9Y2X9	ZNF281	Zinc finger protein 281 (GC-box-binding zinc finger protein 1) (Transcription factor ZBP-99) (Zinc finger DNA-binding protein 99)	9	10	0.0188259	0.0375854	comp2	0.947333

## Sheet: Table S3
Table S3. GO overrepresentation analysis performed with 115 dysrefulated proteins
			down-pco					up-pco
GO category	Term	Total annotated genes in this class	No of genes	Percentage of genes	Fold value	P-value (BH method)		No of genes	Percentage of genes	Fold value	P-value (BH method)
Cellular component	extracellular vesicular exosome	2091	21	53.8462	4.85158	1.20354e-07		30	42.8571	3.86135	4.14649e-09
Cellular component	extracellular region	1860	17	43.5897	4.41572	2.64252e-05		33	47.1429	4.77484	1.13402e-12
Cellular component	extracellular space	1548	16	41.0256	4.99379	2.11172e-05		35	50	6.08481	8.17391e-17
Cellular component	plasma membrane	4522	13	33.3333	1.38918	1		37	52.8571	2.202	4.38824e-05
Cellular component	collagen-containing extracellular matrix	328	7	17.9487	10.3191	0.00149978		2	2.85714	1.64869	1
Cellular component	blood microparticle	141	5	12.8205	17.1554	0.00295757		11	15.7143	21.0071	1.7865e-09
Cellular component	external side of plasma membrane	369	4	10.2564	5.2471	0.374803		12	17.1429	8.75656	2.94905e-06
Cellular component	hexameric IgM immunoglobulin complex	2	2	5.12821	482.851	0.00149978		0	0	0.01	1
Cellular component	pentameric IgM immunoglobulin complex	3	2	5.12821	322.435	0.00308952		1	1.42857	90.2784	1
Cellular component	immunoglobulin complex, circulating	85	1	2.5641	5.73673	1		11	15.7143	34.8455	8.12332e-12
Cellular component	secretory IgA immunoglobulin complex	4	1	2.5641	121.616	0.407659		2	2.85714	134.859	0.0156082
Cellular component	monomeric IgA immunoglobulin complex	4	1	2.5641	121.616	0.407659		2	2.85714	134.859	0.0156082
Molecular function	antigen binding	176	4	10.2564	10.3431	0.661305		34	49.2754	49.5879	4.93688e-47
Molecular function	serine-type endopeptidase activity	255	2	5.12821	3.57834	1		22	31.8841	22.1498	8.26373e-21
Molecular function	immunoglobulin receptor binding	90	2	5.12821	10.1379	1		11	15.942	31.3909	6.24192e-11
Biological process	immune response	446	5	12.8205	5.12494	1		28	40.5797	16.1968	1.00981e-23
Biological process	complement activation, classical pathway	154	3	7.69231	8.91688	1		26	37.6812	43.5563	1.59194e-32
Biological process	proteolysis	527	3	7.69231	2.60581	1		23	33.3333	11.2605	1.62043e-15
Biological process	immunoglobulin production	103	2	5.12821	8.9025	1		23	33.3333	57.6098	1.46175e-31
Biological process	regulation of complement activation	109	4	10.2564	16.7832	0.915643		22	31.8841	52.0731	3.31835e-29
Biological process	complement activation	90	2	5.12821	10.1883	1		21	30.4348	60.1998	3.31835e-29
Biological process	receptor-mediated endocytosis	199	2	5.12821	4.60804	1		20	28.9855	25.9317	3.40752e-20
Biological process	leukocyte migration	190	2	5.12821	4.82631	1		20	28.9855	27.16	1.48217e-20
Biological process	Fc-gamma receptor signaling pathway involved in phagocytosis	133	1	2.5641	3.46444	1		20	28.9855	38.7992	1.14839e-23
Biological process	regulation of immune response	210	0	0	0.01	1		19	27.5362	23.3454	3.3919e-18
Biological process	Fc-epsilon receptor signaling pathway	119	0	0	0.01	1		19	27.5362	41.1963	6.46167e-23
Biological process	innate immune response	471	5	12.8205	4.85292	1		14	20.2899	7.67127	1.98574e-06
Biological process	defense response to bacterium	200	1	2.5641	2.30391	1		12	17.3913	15.4864	1.1098e-08
Biological process	phagocytosis, recognition	92	1	2.5641	5.0082	1		11	15.942	30.8611	5.05641e-11
Biological process	positive regulation of B cell activation	90	1	2.5641	5.11948	1		11	15.942	31.5468	4.26537e-11
Biological process	phagocytosis, engulfment	108	1	2.5641	4.26631	1		11	15.942	26.2895	2.87213e-10
Biological process	B cell receptor signaling pathway	117	1	2.5641	3.93816	1		11	15.942	24.2674	6.56207e-10
Biological process	adaptive immune response	289	4	10.2564	6.33034	1		9	13.0435	8.04028	0.00112681

## Sheet: Table S4
Table S4. Biological pathways and processes enriched by dysregulated proteins. 1D annotation enrichment analysis
Term	Size(number of proteins)	Score	-Log10 p-value	GO/Pathway/Keyword (KW)	Proteins
response to endogenous stimulus	5	-0.63636	1.78533	GOBP	DAG1; PPP2CB; SFRP1; COL5A2; PARP1
regulation of signaling	12	-0.42395	1.78164	GOBP	PSMB1; SFRP1; DAG1; PSMB4; MAPK8IP2; HSP90AB1; INHBC; STRAP; PPP2CB; CDH3; PARP1; PFN2
response to hormone stimulus	3	-0.75595	1.58749	GOBP	DAG1; PARP1; SFRP1
vesicle-mediated transport	21	0.306991	1.54861	GOBP	LAMP1; IGLV2-14; IGLV1-44; IGLV3-25; IGKV1-17; IGKV4-1; IGLV3-19; EZR; IGLV3-21; IGLV2-11; IGLV3-27; IGLV3-1; IGHV3-23; IGLV1-51; IGLV1-40; IGHA1; SPTBN1; IGLC7; IGHV3-9; IGKV3-20; IGKC; PFN2
regulation of transmembrane receptor protein serine/threonine kinase signaling pathway	4	-0.63514	1.50336	GOBP	SFRP1; STRAP; INHBC; PARP1
response to oxidative stress	5	-0.56727	1.48948	GOBP	PRDX2; PPP2CB; P4HB; ATRN; PARP1
regulation of cell communication	11	-0.39161	1.47932	GOBP	PSMB1; SFRP1; DAG1; PSMB4; MAPK8IP2; INHBC; STRAP; PPP2CB; CDH3; PARP1; PFN2
ECM-receptor interaction	3	-0.71429	1.45296	KEGG	DAG1; COL5A2; THBS4
Secreted	26	-0.38375	2.5242	KW	IGHM; DAG1; NPTX2; SFRP1; S100A9; CFHR4; CD5L; IGJ; THBS4; DCN; FETUB; F12; C1QA; C7; IL1RAP; FAP; INHBC; C1QC; AFM; CFHR5; SERPINA5; CP; IGHG3; ATRN; COL5A2; CD59
Acetylation	23	-0.35728	2.08525	KW	H1F0; KRT6A; PSMB1; PRDX2; BLMH; HUWE1; LDHA; PSMB4; COTL1; NAGK; EZR; HEBP2; HSP90AB1; P4HB; SPTBN1; SEPTIN9; ADH5; NT5C3B; RNF123; KHDRBS1; HIST1H1B; PARP1; PFN2
Immunoglobulin V region	16	0.411616	2.0744	KW	IGLV1-44; IGLV3-25; IGLV2-14; IGKV1-17; IGKV4-1; IGHV1-2; IGLV3-19; IGLV3-21; IGLV2-11; IGLV3-27; IGLV3-1; IGHV3-23; IGLV1-51; IGLV1-40; IGHV3-9; IGKV3-20
oxidoreductase activity	5	-0.63063	1.48678	KW	PRDX2; ADH5; LDHA, P4HB; CP
Phosphoprotein	32	-0.25452	1.45708	KW	H1F0; PRDX2; DAG1; LDHA; PSMB4; NAGK; EZR; KSR2; HSP90AB1; IL1RAP; STRAP; FUCA1; SEPTIN9; ADH5; PPP2CB; PARP1
Cytoplasm	26	-0.27053	1.43928	KW	DAG1; LDHA; PRDX2; PSMB4; COTL1; EZR; KSR2; HSP90AB1; STRAP; SEPTIN9; ADH5; PPP2CB; NT5C3B; RNF123; PFN2
Immunoregulatory interactions between a Lymphoid and a non-Lymphoid cell (REACT_11152),	17	0.338535	1.58049	Reactome	IGLV1-44; IGLV3-25; IGLV2-14; IGKV1-17; IGKV4-1; IGLV3-19; IGLV3-21; IGLV2-11; IGLV3-27; IGLV3-1; IGHV3-23; IGLV1-51; IGLV1-40; IGLC7; IGHV3-9; IGKV3-20; IGKC
FCERI mediated MAPK activation (REACT_163701)	17	0.338535	1.58049	Reactome	IGLV1-44; IGLV3-25; IGLV2-14; IGKV1-17; IGKV4-1; IGLV3-19; IGLV3-21; IGLV2-11; IGLV3-27; IGLV3-1; IGHV3-23; IGLV1-51; IGLV1-40; IGLC7; IGHV3-9; IGKV3-20; IGKC
Role of LAT2/NTAL/LAB on calcium mobilization (REACT_163769)	17	0.338535	1.58049	Reactome	IGLV1-44; IGLV3-25; IGLV2-14; IGKV1-17; IGKV4-1; IGLV3-19; IGLV3-21; IGLV2-11; IGLV3-27; IGLV3-1; IGHV3-23; IGLV1-51; IGLV1-40; IGLC7; IGHV3-9; IGKV3-20; IGKC
FCERI mediated Ca+2 mobilization (REACT_163834)	17	0.338535	1.58049	Reactome	IGLV1-44; IGLV3-25; IGLV2-14; IGKV1-17; IGKV4-1; IGLV3-19; IGLV3-21; IGLV2-11; IGLV3-27; IGLV3-1; IGHV3-23; IGLV1-51; IGLV1-40; IGLC7; IGHV3-9; IGKV3-20; IGKC
Fc epsilon receptor (FCERI) signaling (REACT_163936)	17	0.338535	1.58049	Reactome	IGLV1-44; IGLV3-25; IGLV2-14; IGKV1-17; IGKV4-1; IGLV3-19; IGLV3-21; IGLV2-11; IGLV3-27; IGLV3-1; IGHV3-23; IGLV1-51; IGLV1-40; IGLC7; IGHV3-9; IGKV3-20; IGKC
FCERI mediated NF-kB activation (REACT_163994)	17	0.338535	1.58049	Reactome	IGLV1-44; IGLV3-25; IGLV2-14; IGKV1-17; IGKV4-1; IGLV3-19; IGLV3-21; IGLV2-11; IGLV3-27; IGLV3-1; IGHV3-23; IGLV1-51; IGLV1-40; IGLC7; IGHV3-9; IGKV3-20; IGKC
Scavenging of heme from plasma (REACT_160163)	18	0.32646	1.54891	Reactome	IGLV1-44; IGLV3-25; IGLV2-14; IGKV1-17; IGKV4-1; IGLV3-19; IGLV3-21; IGLV2-11; IGLV3-27; IGLV3-1; IGHV3-23; IGLV1-51; IGLV1-40; IGHA1; IGLC7; IGHV3-9; IGKV3-20; IGKC
Role of phospholipids in phagocytosis (REACT_160158)	18	0.310424	1.43202	Reactome	IGLV1-44; IGLV3-25; IGLV2-14; IGKV1-17; IGKV4-1; IGLV3-19; IGLV3-21; IGLV2-11; IGLV3-27; IGLV3-1; IGHV3-23; IGLV1-51; IGLV1-40; IGLC7; IGHV3-9; IGKV3-20; IGHG3; IGKC
FCGR activation (REACT_160274)	18	0.310424	1.43202	Reactome	IGLV1-44; IGLV3-25; IGLV2-14; IGKV1-17; IGKV4-1; IGLV3-19; IGLV3-21; IGLV2-11; IGLV3-27; IGLV3-1; IGHV3-23; IGLV1-51; IGLV1-40; IGLC7; IGHV3-9; IGKV3-20; IGHG3; IGKC

## Sheet: Table S5
Table S5. Functional annotation clustering of dysregulated secreted proteins and well-known proteins involved in follicular development. Clusters shown in Figure 4a are highlighted in yellow.
Category	Term	Cluster	Enrichment score	Count	%	PValue	Genes	List Total	Pop Hits	Pop Total	Fold Enrichment	Bonferroni	Benjamini	FDR
GOTERM_BP_DIRECT	GO:0006958~complement activation, classical pathway	1	18.7288	24	19.6721	1.24e-30	C1QA, IGHM, IGLC7, IGHV3-23, IGLV3-1, IGHG3, IGLV2-11, IGLV3-25, IGLV1-51, IGLV3-27, IGLV1-40, IGKC, C7, IGKV1-17, IGLV2-14, IGLV3-21, IGLV1-44, IGKV4-1, IGLC2, IGHA1, IGHV3-9, IGKV3-20, IGLV3-19, C1QC	104	99	16792	39.1422	9.74e-28	9.74e-28	9.59e-28
GOTERM_BP_DIRECT	GO:0006956~complement activation	1	18.7288	22	18.0328	2.17e-28	C1QA, IGLC7, IGHV3-23, IGLV3-1, IGHG3, IGLV2-11, IGLV3-25, IGLV1-51, IGLV3-27, IGLV1-40, IGKC, C7, IGKV1-17, IGLV2-14, IGLV3-21, IGLV1-44, IGKV4-1, IGLC2, IGHV3-9, IGKV3-20, IGLV3-19, C1QC	104	87	16792	40.8294	1.7e-25	8.49e-26	8.36e-26
REACTOME_PATHWAY	R-HSA-173623:R-HSA-173623	1	18.7288	21	17.2131	1.13e-27	C1QA, IGLC7, IGHV3-23, IGLV3-1, IGHG3, IGLV2-11, IGLV3-25, IGLV1-51, IGLV3-27, IGLV1-40, IGKC, IGKV1-17, IGLV2-14, IGLV3-21, IGLV1-44, IGKV4-1, IGLC2, IGHV3-9, IGKV3-20, IGLV3-19, C1QC	74	64	9075	40.2397	2.01e-25	2.01e-25	1.97e-25
REACTOME_PATHWAY	R-HSA-166663:R-HSA-166663	1	18.7288	21	17.2131	4.32e-26	C1QA, IGLC7, IGHV3-23, IGLV3-1, IGHG3, IGLV2-11, IGLV3-25, IGLV1-51, IGLV3-27, IGLV1-40, IGKC, IGKV1-17, IGLV2-14, IGLV3-21, IGLV1-44, IGKV4-1, IGLC2, IGHV3-9, IGKV3-20, IGLV3-19, C1QC	74	75	9075	34.3378	7.69e-24	3.85e-24	3.78e-24
GOTERM_MF_DIRECT	GO:0003823~antigen binding	1	18.7288	21	17.2131	2.59e-25	IGHM, IGLC7, IGHV3-23, IGLV3-1, IGHG3, IGLV2-11, IGLV3-25, IGLV1-51, IGLV3-27, IGLV1-40, IGKC, IGKV1-17, IGLV2-14, IGLV3-21, IGLV1-44, IGKV4-1, IGLC2, IGHA1, IGHV3-9, IGKV3-20, IGLV3-19	101	103	16881	34.0768	6.07e-23	6.07e-23	6.07e-23
REACTOME_PATHWAY	R-HSA-5690714:R-HSA-5690714	1	18.7288	19	15.5738	2.07e-24	IGHM, IGLC7, IGHV3-23, IGLV3-1, IGLV2-11, IGLV3-25, IGLV1-51, IGLV3-27, IGLV1-40, IGKC, IGKV1-17, IGLV2-14, IGLV3-21, IGLV1-44, IGKV4-1, IGLC2, IGHV3-9, IGKV3-20, IGLV3-19	74	61	9075	38.1978	3.69e-22	1.23e-22	1.21e-22
REACTOME_PATHWAY	R-HSA-2168880:R-HSA-2168880	1	18.7288	19	15.5738	2.59e-23	IGLC7, IGHV3-23, IGLV3-1, IGLV2-11, IGLV3-25, IGLV1-51, IGLV3-27, IGLV1-40, IGKC, IGKV1-17, IGLV2-14, IGLV3-21, IGLV1-44, IGKV4-1, IGLC2, IGHA1, IGHV3-9, IGKV3-20, IGLV3-19	74	69	9075	33.7691	4.62e-21	1.15e-21	1.13e-21
REACTOME_PATHWAY	R-HSA-2029481:R-HSA-2029481	1	18.7288	19	15.5738	3.47e-23	IGLC7, IGHV3-23, IGLV3-1, IGHG3, IGLV2-11, IGLV3-25, IGLV1-51, IGLV3-27, IGLV1-40, IGKC, IGKV1-17, IGLV2-14, IGLV3-21, IGLV1-44, IGKV4-1, IGLC2, IGHV3-9, IGKV3-20, IGLV3-19	74	70	9075	33.2867	6.17e-21	1.23e-21	1.21e-21
UP_KEYWORDS	Immunoglobulin V region	1	18.7288	16	13.1148	9.99e-23	IGHV3-23, IGLV3-1, IGLV2-11, IGLV3-25, IGLV1-51, IGLV3-27, IGLV1-40, IGKC, IGKV1-17, IGLV2-14, IGLV3-21, IGLV1-44, IGKV4-1, IGHV3-9, IGKV3-20, IGLV3-19	120	48	20581	57.1694	2.02e-20	2.02e-20	1.88e-20
REACTOME_PATHWAY	R-HSA-2454202:R-HSA-2454202	1	18.7288	18	14.7541	1.36e-22	IGLC7, IGHV3-23, IGLV3-1, IGLV2-11, IGLV3-25, IGLV1-51, IGLV3-27, IGLV1-40, IGKC, IGKV1-17, IGLV2-14, IGLV3-21, IGLV1-44, IGKV4-1, IGLC2, IGHV3-9, IGKV3-20, IGLV3-19	74	61	9075	36.1874	2.42e-20	4.03e-21	3.96e-21
GOTERM_CC_DIRECT	GO:0005576~extracellular region	1	18.7288	47	38.5246	7.91e-22	C1QA, IGHV3-23, CD5L, AFM, IGLV3-1, IL1RAP, THBS4, SERPINA5, IGLV2-11, IGHG3, IGLV3-25, IGLV1-40, IGLV3-27, C7, IGKC, IGKV1-17, IGLV2-14, IGLV3-21, IGLV1-44, DAG1, IGKV1-12, IGLC2, AMH, NPTX2, IGHA1, IGHV3-9, IGLC7, FST, F12, INHBB, INHBA, CP, INHBC, DCN, GDF9, SFRP1, IGLV1-51, CFHR4, COL5A2, IGKV4-1, CFHR5, FETUB, P4HB, S100A9, IGKV3-20, IGLV3-19, C1QC	105	1610	18224	5.06671	1.46e-19	7.28e-20	7.08e-20
REACTOME_PATHWAY	R-HSA-2029485:R-HSA-2029485	1	18.7288	19	15.5738	1.03e-21	IGLC7, IGHV3-23, IGLV3-1, IGHG3, IGLV2-11, IGLV3-25, IGLV1-51, IGLV3-27, IGLV1-40, IGKC, IGKV1-17, IGLV2-14, IGLV3-21, IGLV1-44, IGKV4-1, IGLC2, IGHV3-9, IGKV3-20, IGLV3-19	74	83	9075	28.0731	1.84e-19	2.62e-20	2.58e-20
GOTERM_BP_DIRECT	GO:0038096~Fc-gamma receptor signaling pathway involved in phagocytosis	1	18.7288	20	16.3934	1.73e-21	HSP90AB1, IGLC7, IGHV3-23, IGLV3-1, IGHG3, IGLV2-11, IGLV3-25, IGLV1-51, IGLV3-27, IGLV1-40, IGKC, IGKV1-17, IGLV2-14, IGLV3-21, IGLV1-44, IGKV4-1, IGLC2, IGHV3-9, IGKV3-20, IGLV3-19	104	127	16792	25.427	1.36e-18	4.52e-19	4.46e-19
REACTOME_PATHWAY	R-HSA-2730905:R-HSA-2730905	1	18.7288	18	14.7541	2.46e-21	IGLC7, IGHV3-23, IGLV3-1, IGLV2-11, IGLV3-25, IGLV1-51, IGLV3-27, IGLV1-40, IGKC, IGKV1-17, IGLV2-14, IGLV3-21, IGLV1-44, IGKV4-1, IGLC2, IGHV3-9, IGKV3-20, IGLV3-19	74	71	9075	31.0906	4.38e-19	5.47e-20	5.38e-20
REACTOME_PATHWAY	R-HSA-983695:R-HSA-983695	1	18.7288	19	15.5738	9.46e-21	IGHM, IGLC7, IGHV3-23, IGLV3-1, IGLV2-11, IGLV3-25, IGLV1-51, IGLV3-27, IGLV1-40, IGKC, IGKV1-17, IGLV2-14, IGLV3-21, IGLV1-44, IGKV4-1, IGLC2, IGHV3-9, IGKV3-20, IGLV3-19	74	93	9075	25.0545	1.68e-18	1.87e-19	1.84e-19
REACTOME_PATHWAY	R-HSA-2029482:R-HSA-2029482	1	18.7288	20	16.3934	2.84e-20	HSP90AB1, IGLC7, IGHV3-23, IGLV3-1, IGHG3, IGLV2-11, IGLV3-25, IGLV1-51, IGLV3-27, IGLV1-40, IGKC, IGKV1-17, IGLV2-14, IGLV3-21, IGLV1-44, IGKV4-1, IGLC2, IGHV3-9, IGKV3-20, IGLV3-19	74	118	9075	20.7856	5.05e-18	5.05e-19	4.97e-19
GOTERM_MF_DIRECT	GO:0004252~serine-type endopeptidase activity	1	18.7288	23	18.8525	8.61e-20	C1QA, IGLC7, F12, IGHV3-23, IGLV3-1, IGHG3, IGLV2-11, IGLV3-25, IGLV1-51, IGLV3-27, IGLV1-40, FAP, IGKC, IGKV1-17, IGLV2-14, IGLV3-21, IGLV1-44, IGKV4-1, IGLC2, IGHV3-9, IGKV3-20, IGLV3-19, C1QC	101	255	16881	15.0752	2.01e-17	1.01e-17	1.01e-17
REACTOME_PATHWAY	R-HSA-2871796:R-HSA-2871796	1	18.7288	18	14.7541	1.06e-19	IGLC7, IGHV3-23, IGLV3-1, IGLV2-11, IGLV3-25, IGLV1-51, IGLV3-27, IGLV1-40, IGKC, IGKV1-17, IGLV2-14, IGLV3-21, IGLV1-44, IGKV4-1, IGLC2, IGHV3-9, IGKV3-20, IGLV3-19	74	87	9075	25.3728	1.89e-17	1.72e-18	1.69e-18
REACTOME_PATHWAY	R-HSA-2871809:R-HSA-2871809	1	18.7288	18	14.7541	1.31e-19	IGLC7, IGHV3-23, IGLV3-1, IGLV2-11, IGLV3-25, IGLV1-51, IGLV3-27, IGLV1-40, IGKC, IGKV1-17, IGLV2-14, IGLV3-21, IGLV1-44, IGKV4-1, IGLC2, IGHV3-9, IGKV3-20, IGLV3-19	74	88	9075	25.0845	2.33e-17	1.94e-18	1.91e-18
REACTOME_PATHWAY	R-HSA-2871837:R-HSA-2871837	1	18.7288	20	16.3934	5.39e-19	IGLC7, IGHV3-23, IGLV3-1, IGLV2-11, IGLV3-25, PSMB4, IGLV1-51, IGLV3-27, IGLV1-40, IGKC, IGKV1-17, IGLV2-14, IGLV3-21, IGLV1-44, PSMB1, IGKV4-1, IGLC2, IGHV3-9, IGKV3-20, IGLV3-19	74	137	9075	17.9029	9.6e-17	7.39e-18	7.26e-18
GOTERM_BP_DIRECT	GO:0038095~Fc-epsilon receptor signaling pathway	1	18.7288	20	16.3934	1.24e-18	IGLC7, IGHV3-23, IGLV3-1, IGLV2-11, IGLV3-25, PSMB4, IGLV1-51, IGLV3-27, IGLV1-40, IGKC, IGKV1-17, IGLV2-14, IGLV3-21, IGLV1-44, PSMB1, IGKV4-1, IGLC2, IGHV3-9, IGKV3-20, IGLV3-19	104	178	16792	18.1417	9.76e-16	2.44e-16	2.4e-16
GOTERM_BP_DIRECT	GO:0006898~receptor-mediated endocytosis	1	18.7288	20	16.3934	2.88e-18	IGLC7, IGHV3-23, CD5L, IGLV3-1, IGLV2-11, IGLV3-25, IGLV1-51, IGLV3-27, IGLV1-40, IGKC, IGKV1-17, IGLV2-14, IGLV3-21, IGLV1-44, IGKV4-1, IGLC2, IGHA1, IGHV3-9, IGKV3-20, IGLV3-19	104	186	16792	17.3615	2.26e-15	4.52e-16	4.45e-16
GOTERM_BP_DIRECT	GO:0050776~regulation of immune response	1	18.7288	18	14.7541	6.17e-16	IGLC7, IGHV3-23, IGLV3-1, IGLV2-11, IGLV3-25, IGLV1-51, IGLV3-27, IGLV1-40, IGKC, IGKV1-17, IGLV2-14, IGLV3-21, IGLV1-44, IGKV4-1, IGLC2, IGHV3-9, IGKV3-20, IGLV3-19	104	178	16792	16.3276	5.22e-13	8.07e-14	7.94e-14
GOTERM_CC_DIRECT	GO:0072562~blood microparticle	1	18.7288	16	13.1148	8.21e-15	IGHM, IGLC7, IGHV3-23, CD5L, AFM, CP, IGHG3, IGLV3-25, IGKC, IGKV1-17, IGLV3-21, IGKV4-1, IGLC2, IGHA1, IGKV3-20, C1QC	105	152	18224	18.2697	1.51e-12	5.04e-13	4.9e-13
GOTERM_BP_DIRECT	GO:0006508~proteolysis	1	18.7288	24	19.6721	2.82e-14	C1QA, IGLC7, IGHV3-23, IGLV3-1, IGHG3, IGLV2-11, IGLV3-25, SFRP1, IGLV1-51, IGLV3-27, IGLV1-40, FAP, IGKC, IGKV1-17, IGLV2-14, IGLV3-21, IGLV1-44, IGKV4-1, BLMH, IGLC2, IGHV3-9, IGKV3-20, IGLV3-19, C1QC	104	500	16792	7.75015	2.21e-11	3.16e-12	3.11e-12
REACTOME_PATHWAY	R-HSA-198933:R-HSA-198933	1	18.7288	18	14.7541	6.19e-14	IGLC7, IGHV3-23, IGLV3-1, IGLV2-11, IGLV3-25, IGLV1-51, IGLV3-27, IGLV1-40, IGKC, IGKV1-17, IGLV2-14, IGLV3-21, IGLV1-44, IGKV4-1, IGLC2, IGHV3-9, IGKV3-20, IGLV3-19	74	186	9075	11.8679	1.1e-11	7.87e-13	7.74e-13
UP_KEYWORDS	Adaptive immunity	1	18.7288	16	13.1148	8.45e-14	IGHV3-23, IGLV3-1, IGLV2-11, IGLV3-25, IGLV3-27, IGLV1-40, IGKC, IGKV1-17, IGLV2-14, IGLV3-21, IGLV1-44, IGKV1-12, IGKV4-1, IGHV3-9, IGKV3-20, IGLV3-19	120	174	20581	15.7709	1.71e-11	3.42e-12	3.18e-12
UP_KEYWORDS	Immunoglobulin domain	1	18.7288	23	18.8525	6.51e-13	IGHM, IGLC7, IGHV3-23, IGLV3-1, IL1RAP, IGHG3, IGLV2-11, IGLV3-25, IGLV1-51, IGLV3-27, IGLV1-40, IGKC, IGKV1-17, IGLV2-14, IGLV3-21, IGLV1-44, IGKV4-1, ROR1, IGLC2, IGHA1, IGHV3-9, IGKV3-20, IGLV3-19	120	546	20581	7.22471	1.31e-10	2.19e-11	2.04e-11
UP_KEYWORDS	Immunity	1	18.7288	22	18.0328	1.05e-12	C1QA, IGHV3-23, CD5L, IGLV3-1, IL1RAP, IGLV2-11, IGLV3-25, IGLV3-27, IGLV1-40, IGKC, C7, IGKV1-17, IGLV2-14, IGLV3-21, IGLV1-44, IGKV1-12, IGKV4-1, S100A9, IGHV3-9, IGKV3-20, IGLV3-19, C1QC	120	500	20581	7.54637	2.12e-10	3.03e-11	2.82e-11
GOTERM_BP_DIRECT	GO:0006955~immune response	1	18.7288	20	16.3934	9.12e-12	IGHV3-23, IGLV3-1, IL1RAP, IGLV2-11, IGLV3-25, IGLV1-51, IGLV3-27, IGLV1-40, IGKC, C7, IGKV1-17, IGLV2-14, IGLV3-21, IGLV1-44, IGKV4-1, IGHA1, IGHV3-9, IGKV3-20, IGLV3-19, C1QC	104	421	16792	7.67038	7.15e-09	8.94e-10	8.8e-10
UP_KEYWORDS	Cell membrane	1	18.7288	36	29.5082	7.93e-05	IGHM, ABCB6, IGHV3-23, IGLV3-1, IL1RAP, IGLV2-11, IGLV3-25, IGLV1-40, CDH3, IGLV3-27, LAMP1, SGCA, IGKC, IGKV1-17, IGLV2-14, IGLV3-21, IGLV1-44, DAG1, IGKV1-12, CD59, IGHV3-9, SPTBN1, LHCGR, PCDHGC5, INSR, ATRN, IGLV1-51, FAP, FSHR, CDH11, IGKV4-1, P4HB, EZR, S100A9, IGKV3-20, IGLV3-19	120	3175	20581	1.94466	0.01589	0.0016017	0.00149069
GOTERM_CC_DIRECT	GO:0005886~plasma membrane	1	18.7288	40	32.7869	0.000418	IGHM, LTK, ABCB6, IGHV3-23, IGLV3-1, IL1RAP, IGLV2-11, IGLV3-25, IGLV1-40, CDH3, IGLV3-27, LAMP1, IGKC, IGKV1-17, IGLV2-14, IGLV3-21, IGLV1-44, DAG1, IGKV1-12, CD59, IGLC2, IGHV3-9, LHCGR, IGLC7, PCDHGC5, F12, INSR, ATRN, AR, SFRP1, IGLV1-51, FAP, FSHR, CDH11, IGKV4-1, ROR1, EZR, S100A9, IGKV3-20, IGLV3-19	105	4121	18224	1.68466	0.0741179	0.0109989	0.0107
GOTERM_CC_DIRECT	GO:0005576~extracellular region	2	13.3903	47	38.5246	7.91e-22	C1QA, IGHV3-23, CD5L, AFM, IGLV3-1, IL1RAP, THBS4, SERPINA5, IGLV2-11, IGHG3, IGLV3-25, IGLV1-40, IGLV3-27, C7, IGKC, IGKV1-17, IGLV2-14, IGLV3-21, IGLV1-44, DAG1, IGKV1-12, IGLC2, AMH, NPTX2, IGHA1, IGHV3-9, IGLC7, FST, F12, INHBB, INHBA, CP, INHBC, DCN, GDF9, SFRP1, IGLV1-51, CFHR4, COL5A2, IGKV4-1, CFHR5, FETUB, P4HB, S100A9, IGKV3-20, IGLV3-19, C1QC	105	1610	18224	5.06671	1.46e-19	7.28e-20	7.08e-20
UP_KEYWORDS	Signal	2	13.3903	71	58.1967	2.17e-20	AMHR2, HEXB, IGHV3-23, IL1RAP, IGKV3D-15, SERPINA5, CDH3, SGCA, LAMP1, IGKV1-17, IGKV1-12, DAG1, AMH, IGHV3-9, LHCGR, FST, IGKV1D-37, DCN, IGHV1-18, IGLV4-69, ATRN, IGLV5-37, SFRP1, IGLV3-16, IGLV3-10, FSHR, IGLV3-12, CDH11, IGKV4-1, FETUB, ROR1, IGLV3-19, C1QA, LTK, IGHV4-4, CD5L, AFM, IGLV3-1, THBS4, IGLV2-11, IGLV3-25, IGLV3-9, IGLV1-40, IGLV3-27, IGKC, C7, IGLV5-45, IGLV2-14, IGLV3-21, IGLV9-…	120	4160	20581	2.92719	4.38e-18	2.19e-18	2.04e-18
UP_KEYWORDS	Secreted	2	13.3903	47	38.5246	1.28e-17	C1QA, IGHM, IGHV3-23, CD5L, AFM, IGLV3-1, IL1RAP, THBS4, SERPINA5, IGLV2-11, IGHG3, IGLV3-25, IGLV1-40, IGLV3-27, C7, IGKC, IGKV1-17, IGLV2-14, IGLV3-21, IGLV1-44, DAG1, IGKV1-12, CD59, AMH, NPTX2, IGHV3-9, FST, F12, INHBB, INHBA, CP, INHBC, DCN, ATRN, GDF9, SFRP1, IGLV1-51, FAP, CFHR4, COL5A2, IGKV4-1, CFHR5, FETUB, S100A9, IGKV3-20, IGLV3-19, C1QC	120	1965	20581	4.10223	2.58e-15	8.59e-16	7.99e-16
UP_KEYWORDS	Disulfide bond	2	13.3903	58	47.541	2.53e-15	IGHM, AMHR2, HEXB, IGHV3-23, IL1RAP, IGHG3, LAMP1, IGKV1-17, IGKV1-12, DAG1, MAN1A1, IGLC2, AMH, IGHV3-9, LHCGR, FST, DCN, ATRN, SFRP1, FSHR, IGKV4-1, FETUB, ROR1, IGLV3-19, C1QA, CD5L, AFM, IGLV3-1, THBS4, IGLV2-11, PRDX2, IGLV3-25, IGLV1-40, IGLV3-27, IGKC, C7, IGLV2-14, IGLV3-21, IGLV1-44, CD59, NPTX2, IGHA1, IGLC7, INSR, F12, INHBB, INHBA, INHBC, CP, GDF9, IGLV1-51, FAP, CFHR4, COL5A2, CFHR5,…	120	3434	20581	2.89676	5.16e-13	1.28e-13	1.19e-13
UP_KEYWORDS	Glycoprotein	2	13.3903	47	38.5246	3.21e-05	C1QA, IGHM, LTK, HSP90AB1, AMHR2, HEXB, CD5L, AFM, IL1RAP, THBS4, SERPINA5, IGHG3, CDH3, LAMP1, C7, SGCA, PSMB1, DAG1, CD59, MAN1A1, AMH, NPTX2, IGHA1, SPTBN1, LHCGR, PCDHGC5, FUCA1, FST, F12, INSR, INHBB, INHBA, CP, INHBC, DCN, ATRN, GDF9, SFRP1, FAP, FSHR, CFHR4, COL5A2, CDH11, CFHR5, FETUB, ROR1, C1QC	120	4551	20581	1.77124	0.00646201	0.00072	0.00067
GOTERM_CC_DIRECT	GO:0072562~blood microparticle	3	6.14207	16	13.1148	8.21e-15	IGHM, IGLC7, IGHV3-23, CD5L, AFM, CP, IGHG3, IGLV3-25, IGKC, IGKV1-17, IGLV3-21, IGKV4-1, IGLC2, IGHA1, IGKV3-20, C1QC	105	152	18224	18.2697	1.51e-12	5.04e-13	4.9e-13
GOTERM_MF_DIRECT	GO:0034987~immunoglobulin receptor binding	3	6.14207	7	5.7377	7.77e-09	IGHG3, IGHM, IGLC7, IGKC, IGHV3-23, IGLC2, IGHA1	101	26	16881	44.9989	1.82e-06	6.06e-07	6.06e-07
GOTERM_BP_DIRECT	GO:0050871~positive regulation of B cell activation	3	6.14207	7	5.7377	9.58e-09	IGHG3, IGHM, IGLC7, IGKC, IGHV3-23, IGLC2, IGHA1	104	26	16792	43.4704	7.51e-06	8.35e-07	8.22e-07
GOTERM_BP_DIRECT	GO:0006910~phagocytosis, recognition	3	6.14207	7	5.7377	1.55e-08	IGHG3, IGHM, IGLC7, IGKC, IGHV3-23, IGLC2, IGHA1	104	28	16792	40.3654	1.22e-05	1.22e-06	1.2e-06
UP_KEYWORDS	Immunoglobulin C region	3	6.14207	6	4.91803	1.7e-08	IGHG3, IGHM, IGLC7, IGKC, IGLC2, IGHA1	120	15	20581	68.6033	3.44e-06	4.3e-07	4e-07
GOTERM_BP_DIRECT	GO:0006911~phagocytosis, engulfment	3	6.14207	7	5.7377	6.46e-08	IGHG3, IGHM, IGLC7, IGKC, IGHV3-23, IGLC2, IGHA1	104	35	16792	32.2923	5.06e-05	4.6e-06	4.53e-06
GOTERM_BP_DIRECT	GO:0050853~B cell receptor signaling pathway	3	6.14207	7	5.7377	9.36e-07	IGHG3, IGHM, IGLC7, IGKC, IGHV3-23, IGLC2, IGHA1	104	54	16792	20.9302	0.000733	6.11e-05	6.02e-05
GOTERM_CC_DIRECT	GO:0009897~external side of plasma membrane	3	6.14207	10	8.19672	3.62e-06	IGHG3, IGHM, IGLC7, IGKC, LAMP1, IGHV3-23, IGLC2, P4HB, IGHA1, SERPINA5	105	213	18224	8.14845	0.000665	0.000111	0.000108
GOTERM_CC_DIRECT	GO:0042571~immunoglobulin complex, circulating	3	6.14207	5	4.09836	3.63e-06	IGHG3, IGLC7, IGKC, IGHV3-23, IGLC2	105	19	18224	45.6742	0.000668	0.000111	0.000108
GOTERM_BP_DIRECT	GO:0045087~innate immune response	3	6.14207	13	10.6557	1.27e-05	C1QA, IGHM, IGLC7, F12, IGHV3-23, IL1RAP, IGHG3, IGKC, KRT16, IGLC2, IGHA1, S100A9, C1QC	104	430	16792	4.8814	0.00991341	0.000766	0.000755
GOTERM_BP_DIRECT	GO:0001895~retina homeostasis	3	6.14207	4	3.27869	0.00187791	IGHG3, CDH3, IGKC, IGHA1	104	40	16792	16.1462	0.770915	0.0878602	0.0865154
GOTERM_BP_DIRECT	GO:0042742~defense response to bacterium	3	6.14207	6	4.91803	0.00199076	IGHG3, IGLC7, IGKC, IGHV3-23, IGLC2, S100A9	104	145	16792	6.68117	0.790349	0.0878602	0.0865154
KEGG_PATHWAY	hsa04913:Ovarian steroidogenesis	4	3.50792	7	5.7377	1.35e-06	GDF9, LHCGR, STAR, HSD3B2, CYP11A1, INSR, FSHR	52	49	6879	18.8984	0.00014	0.000123	0.000123
GOTERM_BP_DIRECT	GO:0008584~male gonad development	4	3.50792	7	5.7377	2.42e-05	LHCGR, SFRP1, STAR, AMHR2, INSR, FSHR, INHBA	104	94	16792	12.0237	0.0187945	0.00135522	0.00133448
GOTERM_BP_DIRECT	GO:0007186~G-protein coupled receptor signaling pathway	4	3.50792	4	3.27869	0.918944	LHCGR, SFRP1, INSR, FSHR	104	899	16792	0.718405	1	1	0.985951
KEGG_PATHWAY	hsa04350:TGF-beta signaling pathway	6	2.60401	8	6.55738	2.36e-06	PPP2CB, AMHR2, FST, INHBB, INHBA, AMH, INHBC, DCN	52	84	6879	12.5989	0.000245	0.000123	0.000123
GOTERM_MF_DIRECT	GO:0005160~transforming growth factor beta receptor binding	6	2.60401	5	4.09836	0.000109	GDF9, INHBB, INHBA, AMH, INHBC	101	42	16881	19.8975	0.0252218	0.00638598	0.00638598
UP_KEYWORDS	Growth factor	6	2.60401	6	4.91803	0.00099	GDF9, INHBB, INHBA, AMH, INHBC, THBS4	120	131	20581	7.85534	0.181319	0.0153816	0.0143156
UP_KEYWORDS	Cleavage on pair of basic residues	6	2.60401	8	6.55738	0.00162188	GDF9, CDH3, FAP, INSR, CDH11, INHBB, INHBA, INHBC	120	294	20581	4.66689	0.279555	0.0234014	0.0217796
GOTERM_BP_DIRECT	GO:0048468~cell development	6	2.60401	4	3.27869	0.00187791	GDF9, INHBB, INHBA, INHBC	104	40	16792	16.1462	0.770915	0.0878602	0.0865154
GOTERM_BP_DIRECT	GO:0043408~regulation of MAPK cascade	6	2.60401	4	3.27869	0.0020172	GDF9, INHBB, INHBA, INHBC	104	41	16792	15.7523	0.794658	0.0878602	0.0865154
REACTOME_PATHWAY	R-HSA-209822:R-HSA-209822	6	2.60401	3	2.45902	0.00221533	INHBB, INHBA, INHBC	74	9	9075	40.8784	0.326163	0.0246456	0.0242302
GOTERM_MF_DIRECT	GO:0008083~growth factor activity	6	2.60401	6	4.91803	0.00276828	GDF9, INHBB, INHBA, AMH, INHBC, THBS4	101	162	16881	6.19032	0.477263	0.129556	0.129556
GOTERM_BP_DIRECT	GO:0010862~positive regulation of pathway-restricted SMAD protein phosphorylation	6	2.60401	4	3.27869	0.00317301	GDF9, INHBB, INHBA, INHBC	104	48	16792	13.4551	0.917222	0.124382	0.122478
GOTERM_BP_DIRECT	GO:0060395~SMAD protein signal transduction	6	2.60401	4	3.27869	0.00652216	GDF9, INHBB, INHBA, INHBC	104	62	16792	10.4169	0.994084	0.232426	0.228868
GOTERM_MF_DIRECT	GO:0005179~hormone activity	6	2.60401	4	3.27869	0.018332	INHBB, INHBA, AMH, INHBC	101	94	16881	7.11228	0.986826	0.710851	0.710851
KEGG_PATHWAY	hsa04060:Cytokine-cytokine receptor interaction	6	2.60401	6	4.91803	0.0331044	AMHR2, INHBB, IL1RAP, INHBA, AMH, INHBC	52	243	6879	3.26638	0.969837	0.688571	0.688571
GOTERM_MF_DIRECT	GO:0005125~cytokine activity	6	2.60401	4	3.27869	0.0867846	GDF9, INHBB, INHBA, INHBC	101	176	16881	3.7986	1	1	1
UP_KEYWORDS	Hormone	6	2.60401	3	2.45902	0.104751	INHBB, INHBA, INHBC	120	95	20581	5.41605	1	0.675161	0.628368
GOTERM_BP_DIRECT	GO:0042981~regulation of apoptotic process	6	2.60401	4	3.27869	0.142856	GDF9, PRDX2, INHBB, INHBC	104	213	16792	3.03214	1	1	0.985951
KEGG_PATHWAY	hsa04550:Signaling pathways regulating pluripotency of stem cells	6	2.60401	3	2.45902	0.27835	INHBB, INHBA, INHBC	52	140	6879	2.83475	1	1	1
KEGG_PATHWAY	hsa04913:Ovarian steroidogenesis	7	2.37855	7	5.7377	1.35e-06	GDF9, LHCGR, STAR, HSD3B2, CYP11A1, INSR, FSHR	52	49	6879	18.8984	0.00014	0.000123	0.000123
UP_KEYWORDS	Steroidogenesis	7	2.37855	3	2.45902	0.0021067	STAR, HSD3B2, CYP11A1	120	12	20581	42.8771	0.346884	0.026597	0.0247537
KEGG_PATHWAY	hsa04925:Aldosterone synthesis and secretion	7	2.37855	3	2.45902	0.120778	STAR, HSD3B2, CYP11A1	52	81	6879	4.89957	0.999998	1	1
UP_KEYWORDS	Mitochondrion	7	2.37855	5	4.09836	0.893435	HEBP2, STAR, HSD3B2, ABCB6, CYP11A1	120	1119	20581	0.766346	1	1	0.935323
UP_KEYWORDS	Intermediate filament	8	2.00465	4	3.27869	0.0101062	KRT16, KRT2, KRT10, KRT6A	120	77	20581	8.90952	0.871501	0.120085	0.111762
GOTERM_CC_DIRECT	GO:0005882~intermediate filament	8	2.00465	4	3.27869	0.0268989	KRT16, KRT2, KRT10, KRT6A	105	113	18224	6.14378	0.993377	0.419347	0.407952
GOTERM_MF_DIRECT	GO:0005200~structural constituent of cytoskeleton	8	2.00465	4	3.27869	0.0275933	KRT16, KRT2, SPTBN1, KRT6A	101	110	16881	6.07777	0.998566	0.717426	0.717426
UP_KEYWORDS	Keratin	8	2.00465	4	3.27869	0.0591558	KRT16, KRT2, KRT10, KRT6A	120	153	20581	4.48388	0.999996	0.497894	0.463387
KEGG_PATHWAY	hsa04610:Complement and coagulation cascades	9	1.86079	6	4.91803	0.000144	C1QA, C7, F12, CD59, SERPINA5, C1QC	52	69	6879	11.5033	0.0148721	0.00499423	0.00499423
UP_KEYWORDS	Complement pathway	9	1.86079	3	2.45902	0.0138178	C1QA, C7, C1QC	120	31	20581	16.5976	0.939835	0.155067	0.14432
KEGG_PATHWAY	hsa05020:Prion diseases	9	1.86079	3	2.45902	0.0259928	C1QA, C7, C1QC	52	34	6879	11.6725	0.935366	0.675814	0.675814
UP_KEYWORDS	Innate immunity	9	1.86079	5	4.09836	0.0650359	C1QA, C7, IL1RAP, S100A9, C1QC	120	261	20581	3.2856	0.999999	0.52549	0.48907
KEGG_PATHWAY	hsa05322:Systemic lupus erythematosus	9	1.86079	3	2.45902	0.261761	C1QA, C7, C1QC	52	134	6879	2.96168	1	1	1
UP_KEYWORDS	Sushi	10	1.42347	3	2.45902	0.0416904	C7, CFHR4, CFHR5	120	56	20581	9.18795	0.999816	0.382794	0.356264
GOTERM_CC_DIRECT	GO:0005581~collagen trimer	11	0.990491	3	2.45902	0.0970816	C1QA, COL5A2, C1QC	105	92	18224	5.65963	1	1	0.978142
UP_KEYWORDS	Hydroxylation	11	0.990491	3	2.45902	0.104751	C1QA, COL5A2, C1QC	120	95	20581	5.41605	1	0.675161	0.628368
UP_KEYWORDS	Collagen	11	0.990491	3	2.45902	0.110299	C1QA, COL5A2, C1QC	120	98	20581	5.25026	1	0.675161	0.628368
GOTERM_MF_DIRECT	GO:0005509~calcium ion binding	12	0.983353	10	8.19672	0.0262807	CALB2, CDH3, SGCA, PCDHGC5, F12, CDH11, DAG1, MAN1A1, S100A9, THBS4	101	717	16881	2.33108	0.998034	0.717426	0.717426
UP_KEYWORDS	Calcium	12	0.983353	9	7.37705	0.13571	CALB2, CDH3, PCDHGC5, CDH11, COL5A2, MAN1A1, NPTX2, S100A9, THBS4	120	877	20581	1.76006	1	0.761484	0.708708
GOTERM_BP_DIRECT	GO:0007156~homophilic cell adhesion via plasma membrane adhesion molecules	12	0.983353	3	2.45902	0.252791	CDH3, PCDHGC5, CDH11	104	158	16792	3.06573	1	1	0.985951
UP_KEYWORDS	Cell adhesion	12	0.983353	5	4.09836	0.300523	CDH3, FAP, PCDHGC5, CDH11, THBS4	120	479	20581	1.79027	1	1	0.935323
GOTERM_CC_DIRECT	GO:0005913~cell-cell adherens junction	13	0.778376	6	4.91803	0.0376922	LDHA, CDH3, HSP90AB1, DAG1, EZR, SPTBN1	105	323	18224	3.22406	0.999149	0.533489	0.518992
GOTERM_MF_DIRECT	GO:0098641~cadherin binding involved in cell-cell adhesion	13	0.778376	4	3.27869	0.246615	LDHA, HSP90AB1, EZR, SPTBN1	101	290	16881	2.30536	1	1	1
GOTERM_BP_DIRECT	GO:0098609~cell-cell adhesion	13	0.778376	3	2.45902	0.497281	LDHA, HSP90AB1, SPTBN1	104	271	16792	1.7874	1	1	0.985951
GOTERM_BP_DIRECT	GO:0000209~protein polyubiquitination	14	0.765206	4	3.27869	0.103863	PSMB4, PSMB1, HUWE1, BLMH	104	184	16792	3.51003	1	1	0.985951
UP_KEYWORDS	Protease	14	0.765206	6	4.91803	0.207249	PSMB4, FAP, F12, PSMB1, BLMH, SERPINA5	120	544	20581	1.89164	1	0.973132	0.905688
REACTOME_PATHWAY	R-HSA-983168:R-HSA-983168	14	0.765206	5	4.09836	0.235195	RNF123, PSMB4, PSMB1, HUWE1, BLMH	74	308	9075	1.99083	1	1	0.988701
UP_KEYWORDS	NAD	15	0.635846	4	3.27869	0.0811701	LDHA, HSD3B2, PARP1, ADH5	120	175	20581	3.92019	1	0.589377	0.548529
UP_KEYWORDS	Oxidoreductase	15	0.635846	7	5.7377	0.121558	PRDX2, LDHA, HSD3B2, CYP11A1, P4HB, CP, ADH5	120	582	20581	2.06282	1	0.722196	0.672143
KEGG_PATHWAY	hsa01100:Metabolic pathways	15	0.635846	7	5.7377	0.909655	NT5C3B, LDHA, HSD3B2, CYP11A1, HEXB, MAN1A1, ADH5	52	1219	6879	0.759655	1	1	1
REACTOME_PATHWAY	R-HSA-195253:R-HSA-195253	16	0.596988	3	2.45902	0.103641	PPP2CB, PSMB4, PSMB1	74	68	9075	5.41037	1	0.827984	0.81403
GOTERM_BP_DIRECT	GO:0043161~proteasome-mediated ubiquitin-dependent protein catabolic process	16	0.596988	3	2.45902	0.354427	PPP2CB, PSMB4, PSMB1	104	203	16792	2.38613	1	1	0.985951
REACTOME_PATHWAY	R-HSA-2467813:R-HSA-2467813	16	0.596988	3	2.45902	0.440532	PPP2CB, PSMB4, PSMB1	74	185	9075	1.98868	1	1	0.988701
GOTERM_MF_DIRECT	GO:0004714~transmembrane receptor protein tyrosine kinase activity	17	0.570667	3	2.45902	0.0212648	LTK, INSR, ROR1	101	38	16881	13.1952	0.993459	0.710851	0.710851
GOTERM_BP_DIRECT	GO:0007169~transmembrane receptor protein tyrosine kinase signaling pathway	17	0.570667	3	2.45902	0.117436	LTK, INSR, ROR1	104	96	16792	5.04567	1	1	0.985951
UP_KEYWORDS	Kinase	17	0.570667	8	6.55738	0.133938	LTK, NAGK, AMHR2, INSR, STRAP, ROR1, KSR2, MAPK8IP2	120	735	20581	1.86676	1	0.761484	0.708708
GOTERM_BP_DIRECT	GO:0018108~peptidyl-tyrosine phosphorylation	17	0.570667	3	2.45902	0.241437	LTK, INSR, ROR1	104	153	16792	3.16591	1	1	0.985951
GOTERM_CC_DIRECT	GO:0005887~integral component of plasma membrane	17	0.570667	9	7.37705	0.563919	ATRN, LHCGR, LTK, LAMP1, AMHR2, INSR, FSHR, ROR1, IL1RAP	105	1415	18224	1.10393	1	1	0.978142
GOTERM_MF_DIRECT	GO:0004672~protein kinase activity	17	0.570667	3	2.45902	0.631102	LTK, ROR1, KSR2	101	359	16881	1.3967	1	1	1
UP_KEYWORDS	Transferase	17	0.570667	10	8.19672	0.663067	LTK, NAGK, AMHR2, PARP1, INSR, HUWE1, STRAP, ROR1, KSR2, MAPK8IP2	120	1708	20581	1.00415	1	1	0.935323
GOTERM_MF_DIRECT	GO:0005524~ATP binding	17	0.570667	9	7.37705	0.670102	LTK, NAGK, HSP90AB1, ABCB6, AMHR2, INSR, ROR1, KSR2, PMS1	101	1495	16881	1.00619	1	1	1
UP_KEYWORDS	ATP-binding	17	0.570667	8	6.55738	0.701195	LTK, NAGK, HSP90AB1, ABCB6, AMHR2, INSR, ROR1, KSR2	120	1391	20581	0.986389	1	1	0.935323
UP_KEYWORDS	Nucleotide-binding	17	0.570667	9	7.37705	0.821692	NT5C3B, LTK, NAGK, HSP90AB1, ABCB6, AMHR2, INSR, ROR1, KSR2	120	1788	20581	0.863297	1	1	0.935323
UP_KEYWORDS	EGF-like domain	18	0.464414	4	3.27869	0.159446	ATRN, C7, F12, THBS4	120	238	20581	2.88249	1	0.827561	0.770205
UP_KEYWORDS	Leucine-rich repeat	19	0.450652	3	2.45902	0.539122	LHCGR, FSHR, DCN	120	311	20581	1.65442	1	1	0.935323
GOTERM_CC_DIRECT	GO:0005829~cytosol	20	0.337269	22	18.0328	0.335264	KHDRBS1, HSP90AB1, HUWE1, ADH5, CALB2, PPP2CB, AR, NT5C3B, PRDX2, LDHA, SFRP1, PSMB4, NAGK, LAMP1, STAR, PSMB1, DAG1, STRAP, BLMH, EZR, S100A9, SPTBN1	105	3315	18224	1.15184	1	1	0.978142
UP_KEYWORDS	Acetylation	20	0.337269	22	18.0328	0.420878	KHDRBS1, HSP90AB1, PARP1, HUWE1, ADH5, HEBP2, NT5C3B, RNF123, PRDX2, LDHA, PSMB4, H1F0, NAGK, PSMB1, COTL1, BLMH, P4HB, EZR, HIST1H1B, SPTBN1, PFN2, KRT6A	120	3424	20581	1.10198	1	1	0.935323
UP_KEYWORDS	Cytoplasm	20	0.337269	27	22.1311	0.689683	HSP90AB1, CD5L, ADH5, PPP2CB, PRDX2, HEBP2, LDHA, PSMB4, SGCA, PSMB1, DAG1, COTL1, AZI2, SPTBN1, HUWE1, CDC5L, KSR2, MAPK8IP2, NT5C3B, RNF123, AR, FAP, STRAP, BLMH, EZR, S100A9, PFN2	120	4816	20581	0.961529	1	1	0.935323
UP_KEYWORDS	Membrane	21	0.170567	49	40.1639	0.211969	IGHM, AMHR2, IGHV3-23, IL1RAP, CDH3, SGCA, LAMP1, IGKV1-17, IGKV1-12, DAG1, MAN1A1, IGHV3-9, LHCGR, NXPE2, KSR2, ATRN, AR, FSHR, CDH11, IGKV4-1, ROR1, EZR, S100A9, IGLV3-19, PFN2, KHDRBS1, LTK, ABCB6, IGLV3-1, IGLV2-11, IGLV3-25, LDHA, IGLV1-40, IGLV3-27, IGKC, IGLV2-14, CYP11A1, IGLV3-21, IGLV1-44, CD59, SPTBN1, HSD3B2, PCDHGC5, INSR, HUWE1, IGLV1-51, FAP, P4HB, IGKV3-20	120	7494	20581	1.12142	1	0.973132	0.905688
UP_KEYWORDS	Receptor	21	0.170567	12	9.83607	0.355465	ATRN, AR, LHCGR, LTK, LAMP1, AMHR2, INSR, FSHR, DAG1, STRAP, ROR1, IL1RAP	120	1648	20581	1.24885	1	1	0.935323
GOTERM_CC_DIRECT	GO:0005887~integral component of plasma membrane	21	0.170567	9	7.37705	0.563919	ATRN, LHCGR, LTK, LAMP1, AMHR2, INSR, FSHR, ROR1, IL1RAP	105	1415	18224	1.10393	1	1	0.978142
GOTERM_CC_DIRECT	GO:0016021~integral component of membrane	21	0.170567	24	19.6721	0.938705	IGHM, LHCGR, LTK, ABCB6, AMHR2, HSD3B2, PCDHGC5, NXPE2, HUWE1, IL1RAP, ATRN, AR, LDHA, SFRP1, CDH3, SGCA, LAMP1, FAP, FSHR, CDH11, DAG1, ROR1, MAN1A1, PFN2	105	5163	18224	0.806796	1	1	0.978142
UP_KEYWORDS	Transmembrane helix	21	0.170567	24	19.6721	0.983824	IGHM, LHCGR, LTK, ABCB6, AMHR2, HSD3B2, PCDHGC5, INSR, NXPE2, HUWE1, IL1RAP, ATRN, AR, LDHA, CDH3, SGCA, LAMP1, FAP, FSHR, CDH11, DAG1, ROR1, MAN1A1, PFN2	120	5634	20581	0.7306	1	1	0.983824
UP_KEYWORDS	Transmembrane	21	0.170567	24	19.6721	0.984598	IGHM, LHCGR, LTK, ABCB6, AMHR2, HSD3B2, PCDHGC5, INSR, NXPE2, HUWE1, IL1RAP, ATRN, AR, LDHA, CDH3, SGCA, LAMP1, FAP, FSHR, CDH11, DAG1, ROR1, MAN1A1, PFN2	120	5651	20581	0.728402	1	1	0.984598
UP_KEYWORDS	Alternative splicing	21	0.170567	43	35.2459	0.999867	KHDRBS1, IGHM, LTK, ABCB6, AMHR2, IL1RAP, PRDX2, HEBP2, LDHA, CDH3, LAMP1, SGCA, CYP11A1, XIRP2, MAN1A1, AZI2, PMS1, SPTBN1, LHCGR, HSD3B2, PCDHGC5, FST, ZNF281, INSR, NXPE2, HUWE1, KSR2, MAPK8IP2, DCN, ATRN, NT5C3B, RNF123, AR, H1F0, NAGK, FAP, FSHR, CFHR4, CDH11, STRAP, FETUB, ROR1, PFN2	120	10587	20581	0.696596	1	1	0.999867
UP_KEYWORDS	DNA repair	22	0.131056	4	3.27869	0.240396	PARP1, HUWE1, CDC5L, PMS1	120	293	20581	2.34141	1	1	0.935323
UP_KEYWORDS	DNA damage	22	0.131056	4	3.27869	0.33296	PARP1, HUWE1, CDC5L, PMS1	120	352	20581	1.94896	1	1	0.935323
GOTERM_MF_DIRECT	GO:0044212~transcription regulatory region DNA binding	22	0.131056	3	2.45902	0.360433	AR, ZNF281, CDC5L	101	213	16881	2.35406	1	1	1
UP_KEYWORDS	Ubl conjugation	22	0.131056	10	8.19672	0.660986	KHDRBS1, RNF123, PPP2CB, AR, LDHA, HSP90AB1, PARP1, ZNF281, CDC5L, HIST1H1B	120	1705	20581	1.00591	1	1	0.935323
UP_KEYWORDS	Isopeptide bond	22	0.131056	6	4.91803	0.790026	KHDRBS1, AR, PARP1, ZNF281, CDC5L, HIST1H1B	120	1132	20581	0.909055	1	1	0.935323
GOTERM_MF_DIRECT	GO:0043565~sequence-specific DNA binding	22	0.131056	3	2.45902	0.816296	AR, ZNF281, CDC5L	101	518	16881	0.967984	1	1	1
UP_KEYWORDS	DNA-binding	22	0.131056	8	6.55738	0.95867	AR, H1F0, PARP1, ZNF281, HUWE1, CDC5L, HIST1H1B, PMS1	120	2050	20581	0.669301	1	1	0.95867
GOTERM_CC_DIRECT	GO:0005654~nucleoplasm	22	0.131056	11	9.01639	0.96625	KHDRBS1, AR, PSMB4, H1F0, HSP90AB1, PARP1, ZNF281, PSMB1, DAG1, HUWE1, CDC5L	105	2784	18224	0.685769	1	1	0.978142
GOTERM_MF_DIRECT	GO:0003677~DNA binding	22	0.131056	6	4.91803	0.975143	KHDRBS1, AR, PARP1, HUWE1, CDC5L, PMS1	101	1674	16881	0.599063	1	1	1
GOTERM_CC_DIRECT	GO:0005634~nucleus	22	0.131056	23	18.8525	0.981155	KHDRBS1, HSP90AB1, PARP1, ZNF281, KRT2, HUWE1, CDC5L, KRT10, CALB2, PPP2CB, AR, LDHA, PSMB4, H1F0, KRT16, PSMB1, COTL1, STRAP, BLMH, S100A9, PMS1, SPTBN1, KRT6A	105	5415	18224	0.737197	1	1	0.981155
UP_KEYWORDS	Zinc-finger	22	0.131056	5	4.09836	0.993638	RNF123, AR, PARP1, ZNF281, KSR2	120	1781	20581	0.481494	1	1	0.993638
UP_KEYWORDS	Transcription regulation	22	0.131056	5	4.09836	0.999583	KHDRBS1, AR, PARP1, ZNF281, CDC5L	120	2332	20581	0.367728	1	1	0.999583
GOTERM_BP_DIRECT	GO:0006351~transcription, DNA-templated	22	0.131056	4	3.27869	0.999702	KHDRBS1, AR, ZNF281, CDC5L	104	1955	16792	0.330356	1	1	0.999702
UP_KEYWORDS	Transcription	22	0.131056	5	4.09836	0.999705	KHDRBS1, AR, PARP1, ZNF281, CDC5L	120	2398	20581	0.357607	1	1	0.999705
UP_KEYWORDS	Nucleus	22	0.131056	15	12.2951	0.999937	KHDRBS1, PARP1, ZNF281, HUWE1, CDC5L, PPP2CB, AR, PSMB4, H1F0, PSMB1, DAG1, COTL1, STRAP, HIST1H1B, PMS1	120	5244	20581	0.490584	1	1	0.999937
GOTERM_MF_DIRECT	GO:0008270~zinc ion binding	23	0.0133663	5	4.09836	0.9223	RNF123, AR, PARP1, S100A9, ADH5	101	1169	16881	0.714879	1	1	1
UP_KEYWORDS	Zinc-finger	23	0.0133663	5	4.09836	0.993638	RNF123, AR, PARP1, ZNF281, KSR2	120	1781	20581	0.481494	1	1	0.993638
UP_KEYWORDS	Zinc	23	0.0133663	7	5.7377	0.994949	RNF123, AR, PARP1, ZNF281, KSR2, S100A9, ADH5	120	2348	20581	0.511311	1	1	0.994949
