# Supplementary figures and images for: Proteomic Alterations in Follicular Fluid of Human Small Antral Follicles Collected from Polycystic Ovaries—A Pilot Study
Source: MDPI journal article supplement (doi:10.3390/life12030391), 2022-03-08

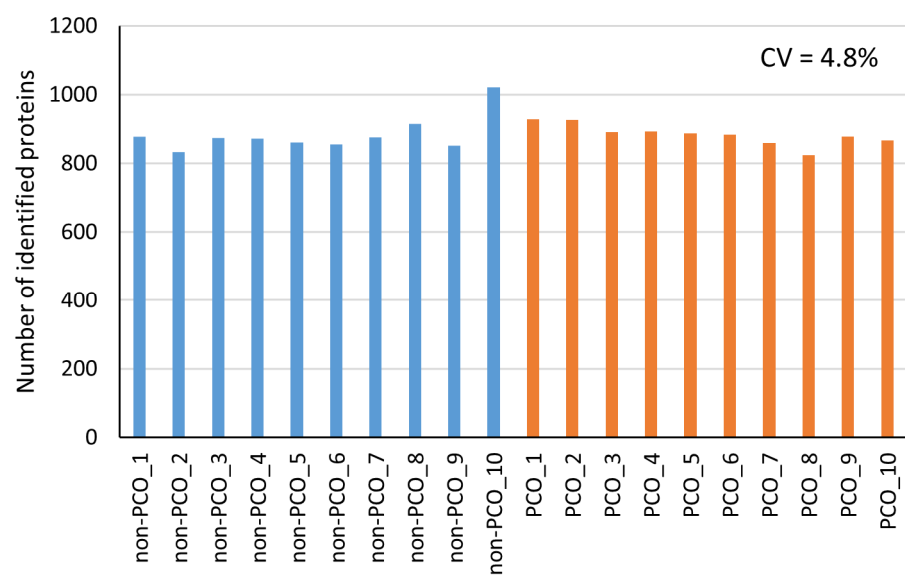

Figure S1: Number of proteins quantified per sample.

Supplement: s1 [file s1]
